# Supplementary material
Source: PubMed Central journal article supplement (PMC11228132)

# Table of Contents

|                                                                                                                                              |    |
|----------------------------------------------------------------------------------------------------------------------------------------------|----|
| Supplementary Fig. 1. FFF probe library and cell models for SLC15A4 inhibitor characterization.....                                          | 3  |
| Supplementary Fig. 2. Target engagement of HA-SLC15A4 in CAL-1 cells.....                                                                    | 4  |
| Supplementary Fig. 3. Characterization of SLC15A4 chemical probes and control compounds.....                                                 | 5  |
| Supplementary Fig. 4. Pharmacological inhibition of SLC15A4 suppresses multiple innate signaling pathways in human immune cells.....         | 7  |
| Supplementary Fig. 5. Pharmacological inhibition of SLC15A4 suppresses multiple innate signaling pathways in mouse immune cells.....         | 9  |
| Supplementary Fig. 6. Mechanistic characterization of SLC15A4 inhibition by AJ2-30.....                                                      | 11 |
| Supplementary Fig. 7. Mechanistic characterization of SLC15A4 inhibition by AJ2-30.....                                                      | 12 |
| Supplementary Fig. 8. Mechanistic characterization of SLC15A4 inhibition by AJ2-30.....                                                      | 13 |
| Supplementary Fig. 9. AJ2-30 down-regulates SLC15A4 in human B cells.....                                                                    | 14 |
| Supplementary Fig. 10. Pharmacological inhibition of SLC15A4 suppresses inflammatory cytokine production in lupus patient derived PBMCs..... | 15 |
| Supplementary Fig. 11: Uncropped western blots of supplementary figures.....                                                                 | 16 |
| Supplementary Fig. 12: Gating strategy for flow cytometry analysis.....                                                                      | 18 |
| Supplementary Table 1: Inhibition of IFN- $\alpha$ production and SLC15A4 transport activity by FFF-15...20                                  | 20 |
| Supplementary Table 2: SLE Patients information.....                                                                                         | 25 |
| Supplementary Table 3: reagents table.....                                                                                                   | 26 |
| NMR spectra .....                                                                                                                            | 33 |

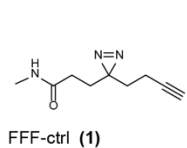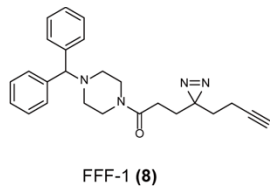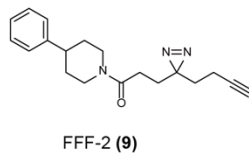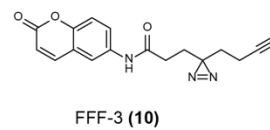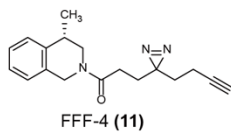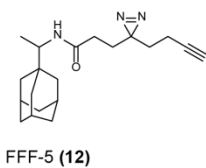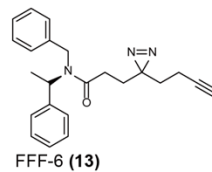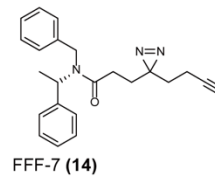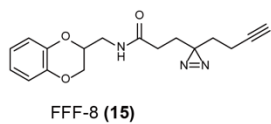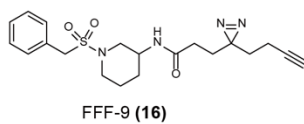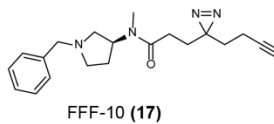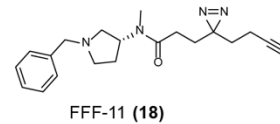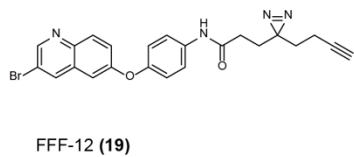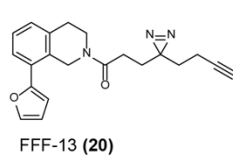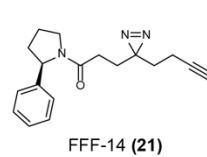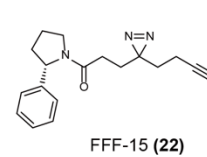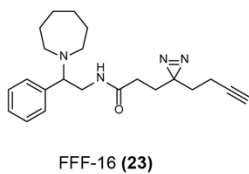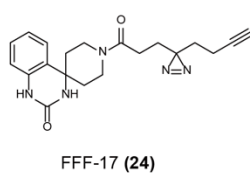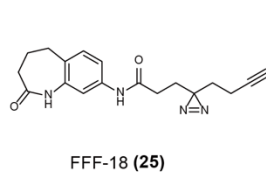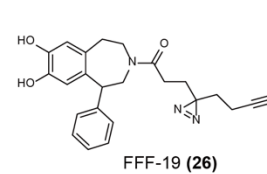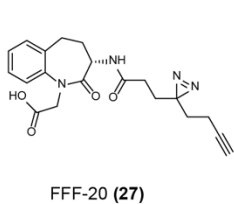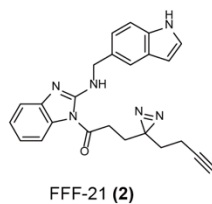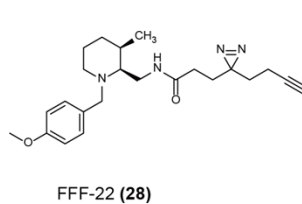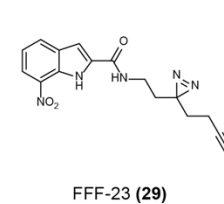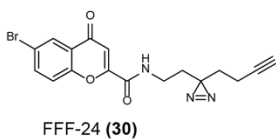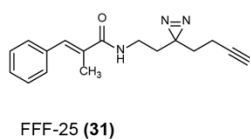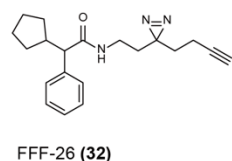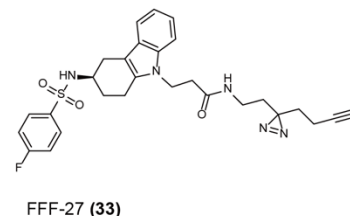

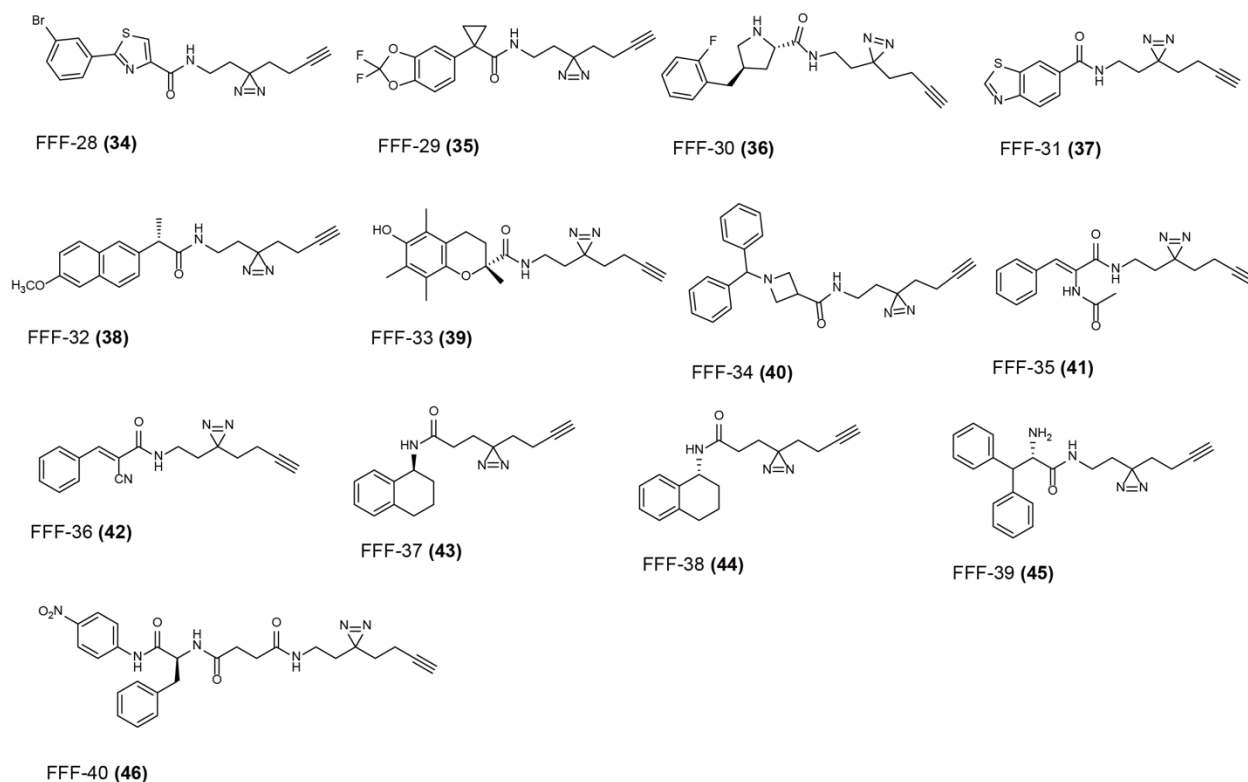

**Supplementary Fig. 1: Fully functionalized fragment (FFF) probe library and cell models for SLC15A4 inhibitor characterization.**

Chemical structures of FFF library. Each member of the FFF probe library possesses: 1) a 'variable' recognition element consisting of structurally diverse small-molecule fragments intended to promote interactions with distinct proteins in human cells; and (2) a structurally minimized 'constant' region bearing a photoactivatable diazirine group and alkyne handle, which together enabled UV-light-induced covalent modification and detection, enrichment, and identification of fragment-interacting protein targets.

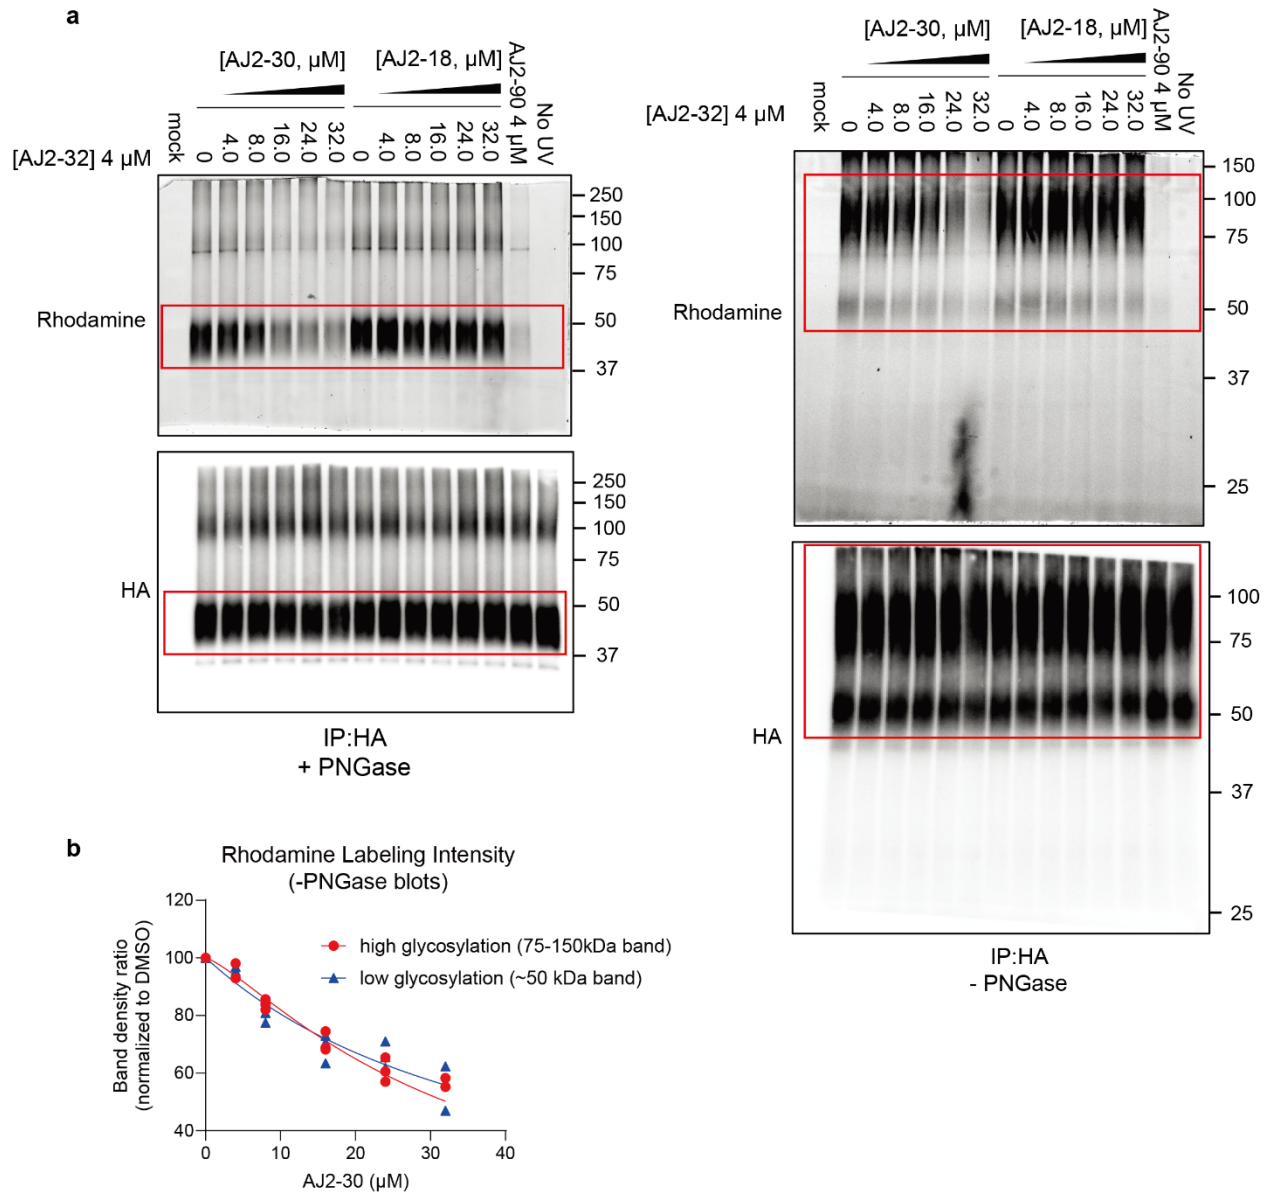

**Supplementary Fig. 2: Target engagement of HA-SLC15A4 in CAL-1 cells.**

**a**, Immunoblot of HA-SLC15A4 engagement with or without PNGase, related to Fig. 2f.

**b**, high and low glycosylation SLC15A4 bands of rhodamine labeling intensity from no PNGase treatment blots were quantified. Data is plotted as mean values for replicates ( $n = 3$  independent biological replicates).



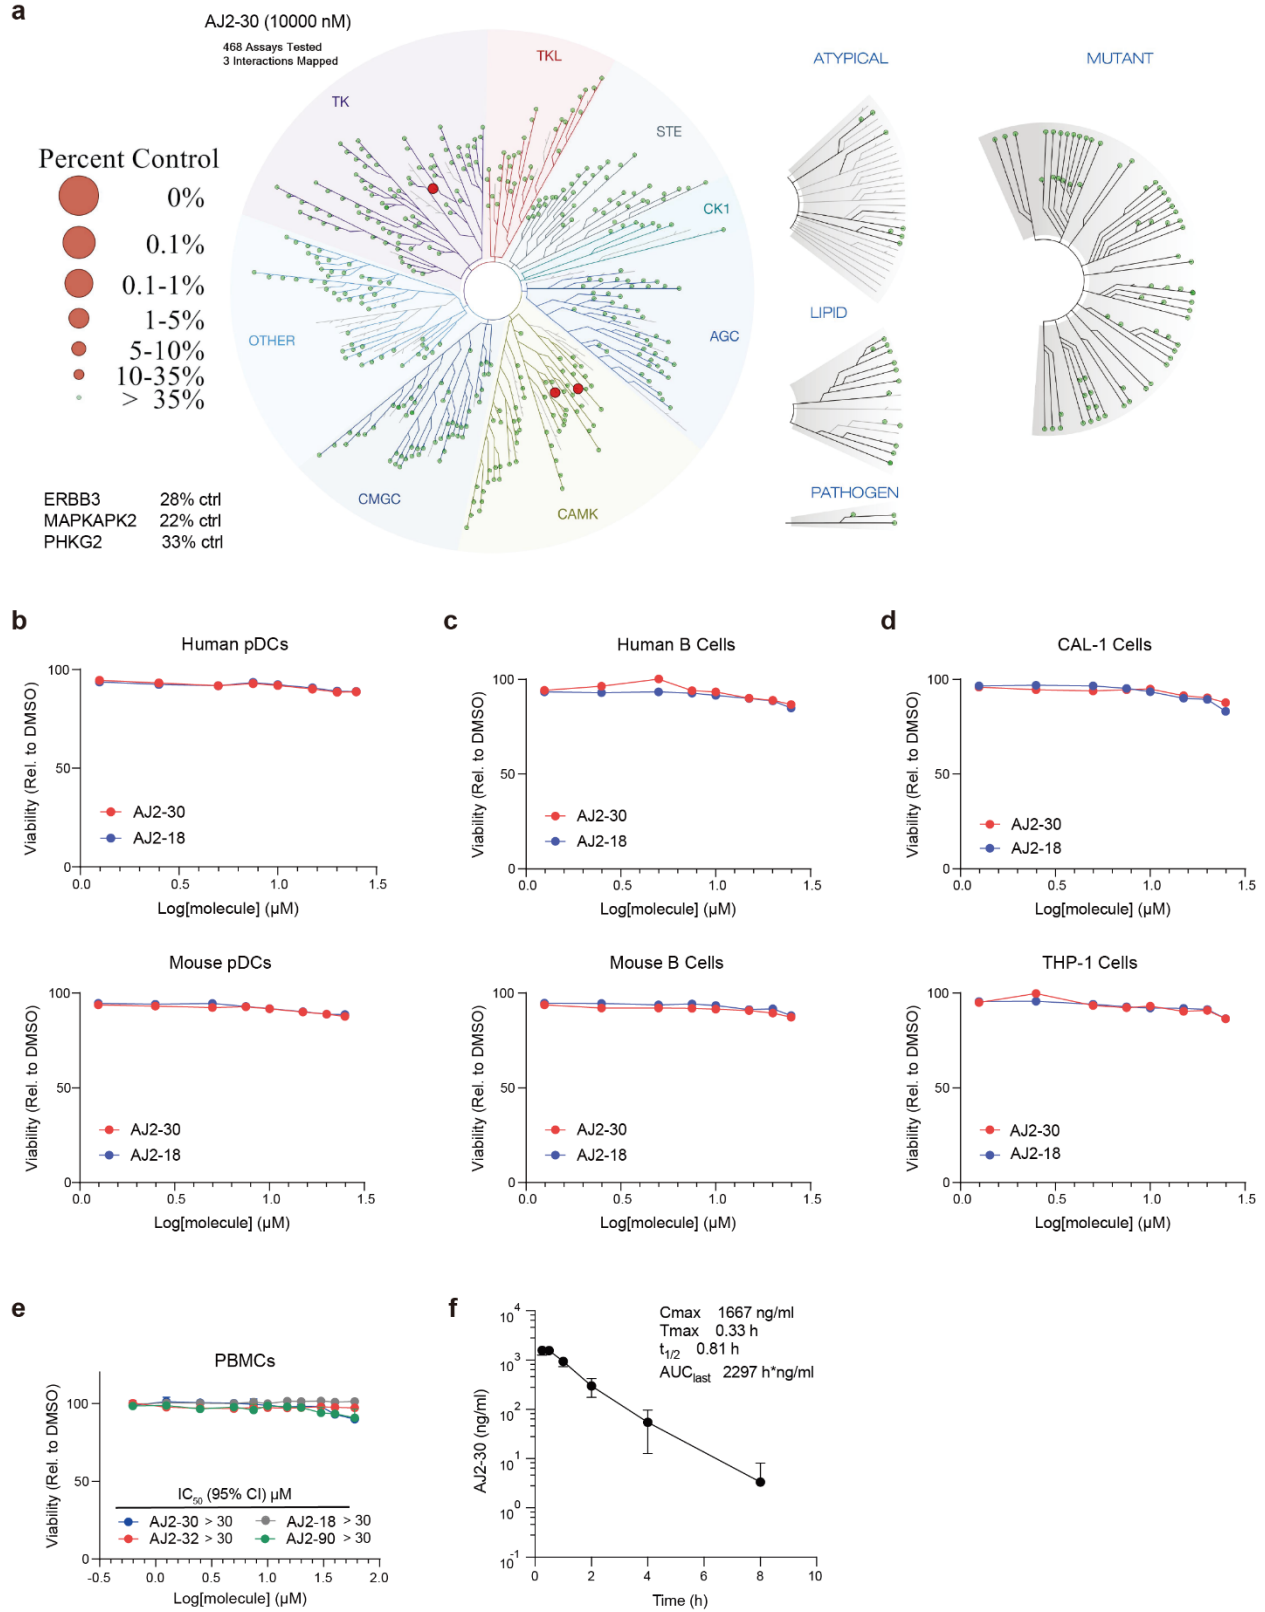

**Supplementary Fig.3: Characterization of SLC15A4 chemical probes and control compounds.**

**a**, AJ2-30 (10  $\mu$ M) was submitted for a KinomeScan (DiscoveryX) profiling to quantify interactions with 468 human kinases. Results are displayed as a TREESPOT interaction map.

**b-e**, Viability profiling of chemical probes in indicated primary immune cells (b, human and mouse pDCs; c, human and mouse B cells), cell lines (d, CAL-1 and THP-1), and human PBMCs (e) 24 h after compound treatment. Viabilities were normalized to DMSO treated group. Data is plotted as the mean  $\pm$  s.d. ( $n = 3$  independent biological replicates).

**f**, Pharmacokinetics of AJ2-30 following intraperitoneal administration (30 mg/kg) to male BALB/c mice. Plasma concentration of AJ2-30 was measured at different time points by LC-MS. Data is plotted as the mean  $\pm$  s.d. ( $n = 6$  independent mice per group).

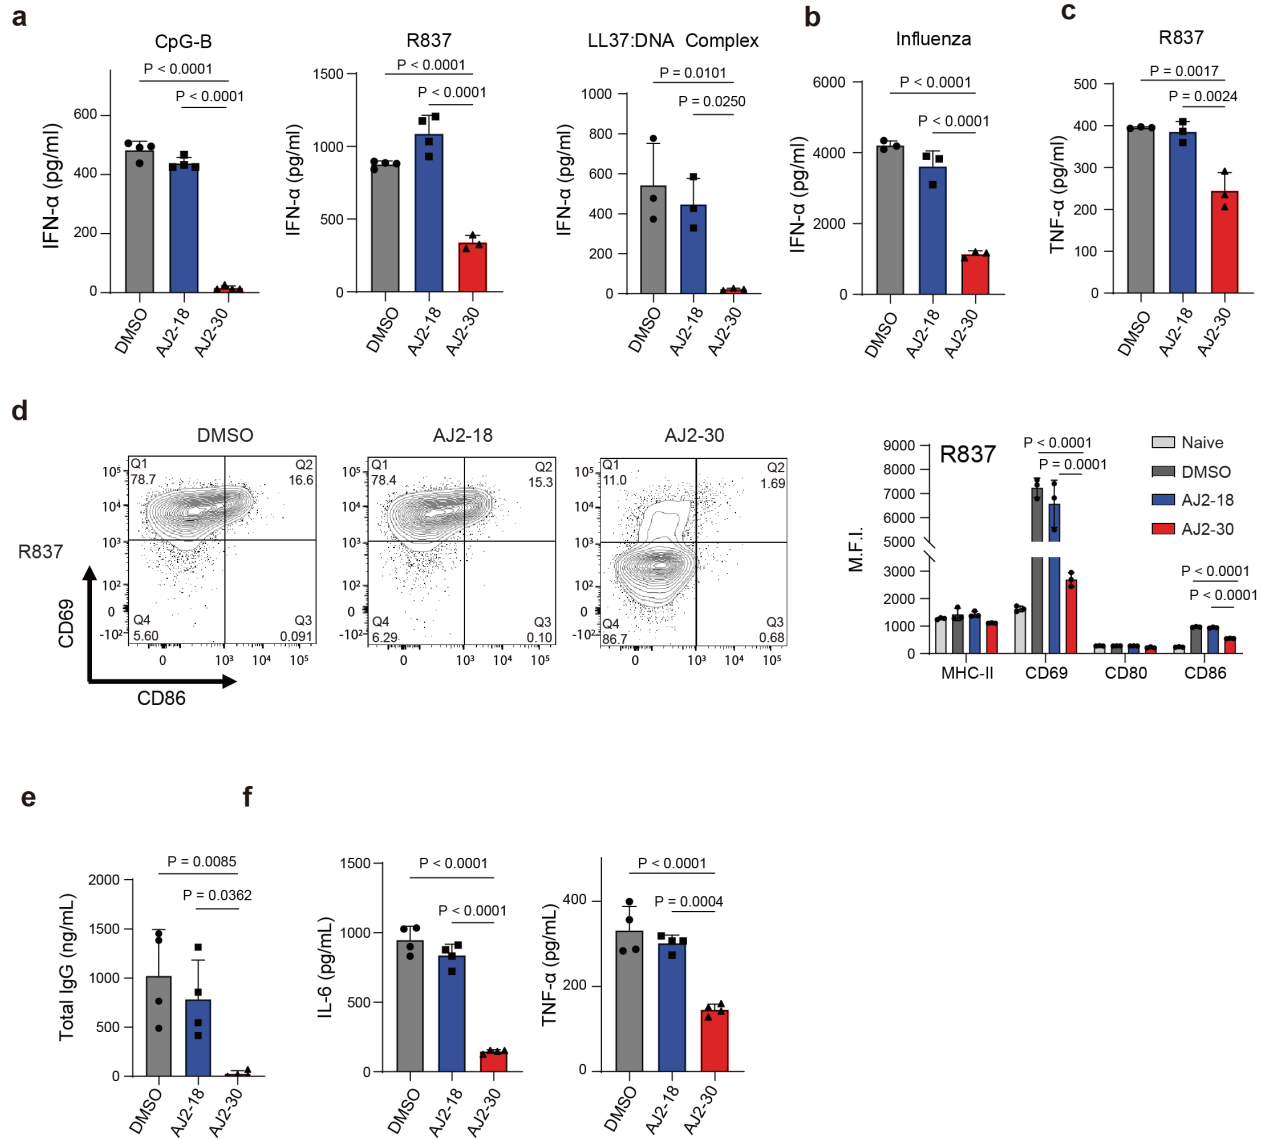

**Supplementary Fig. 4: Pharmacological inhibition of SLC15A4 suppresses multiple innate signaling pathways in human immune cells.**

**a**, AJ2-30 inhibits TLR7, TLR7/8, and TLR9-induced pDC IFN-α production. pDCs were isolated from human PBMCs and treated with AJ2-18 or AJ2-30 (5 μM, 24 h) along with CpG-B (1 μM), R848 (5 μg/mL), or LL37:DNA complex (10 μg/mL).

**b**, AJ2-30 inhibits influenza mediated IFN-α production in human pDCs. pDCs were isolated from human PBMCs and treated with AJ2-18 or AJ2-30 (5 μM, 24 h) along with influenza virus (TLR7 agonist; MOI = 1).

**c**, AJ2-30 inhibits TLR7/8 mediated production of TNF-α in primary human monocytes. Monocytes were isolated from PBMCs and treated with AJ2-18 or AJ2-30 (5 μM, 24 h) along with R837 (5 μg/mL).

**d**, Primary human B cells isolated from PBMCs were treated with AJ2-18 or AJ2-30 (5 μM, 24 h) while stimulated with either R837 (10 μg/mL). B cell activation was assessed by measuring

the surface expression of CD69, CD80, CD86, and MHC-II on live cells.

**e**, *In vitro* IgG secretion from primary human B cells stimulated with R837 for 6 days in the presence of either AJ2-18 and AJ2-30 (5  $\mu$ M). The compounds were not replenished during the treatment.

**F**, *In vitro* secretion of IL-6 and TNF- $\alpha$  from isolated primary human B cells in the presence of either AJ2-18 or AJ2-30 (5  $\mu$ M) when stimulated by R837 after 24 h.

Results are presented as mean  $\pm$  s.d. of at least  $n = 3$  independent biological replicates from at least 3 independent experiments. Statistical analysis was performed using ANOVA analysis followed by multiple comparisons test. *P*-values are shown.

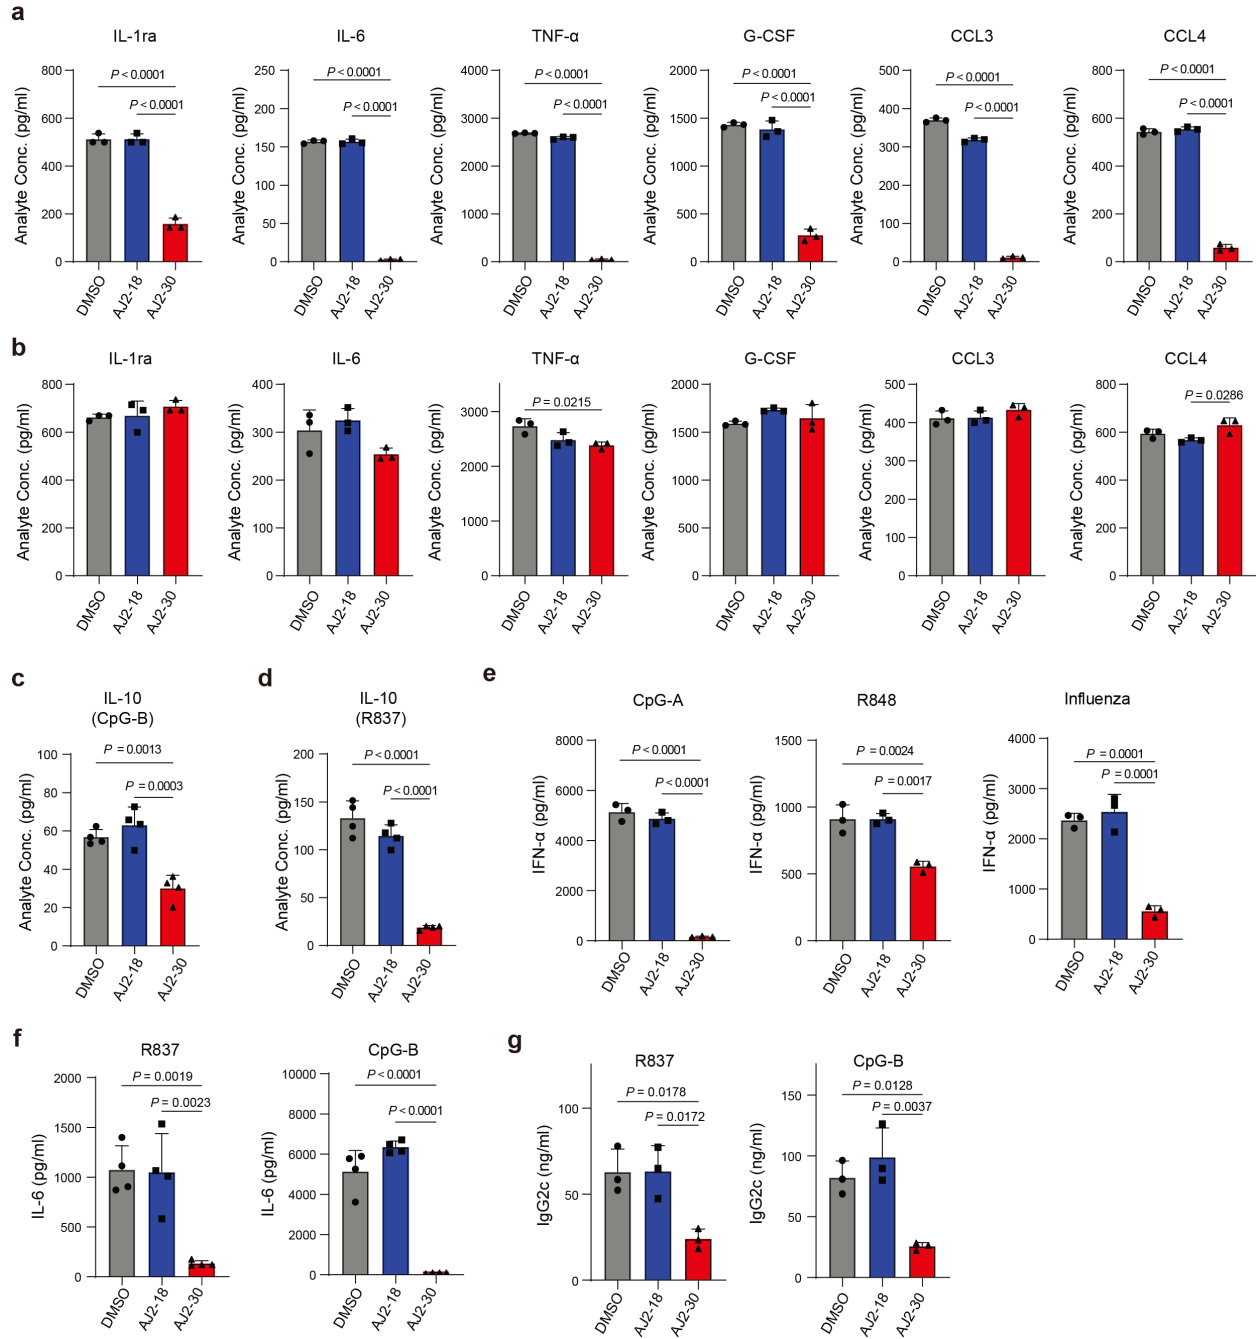

**Supplementary Fig. 5: Pharmacological inhibition of SLC15A4 suppresses multiple innate signaling pathways in mouse immune cells.**

**a, b,** Secretion of cytokines and chemokines by primary human pDCs in the presence of either AJ2-18 or AJ2-30 in response to stimulation with CpG-A (1  $\mu$ M) (a) or R848 (5  $\mu$ g/mL) (b) for 24 h.

**c, d**, Secretion of IL-10 from isolated primary human B cells in the presence of either AJ2-18 (5  $\mu$ M) or AJ2-30 (5  $\mu$ M) when stimulated by either R837 (10  $\mu$ g/mL) or CpG-B (1  $\mu$ M). Cytokine and chemokine levels in supernatants were assessed by Luminex 24 h post-stimulation.

**e**, AJ2-30 inhibits TLR7/8, TLR9, and influenza-induced IFN- $\alpha$  production in mouse pDCs. pDCs were derived from mouse bone marrow using Flt3 ligand and treated with 5  $\mu$ M AJ2-18 or AJ2-30 for 24 h along with 1  $\mu$ M CpG-A, 5  $\mu$ g/ml R848, or challenged with influenza (MOI=1).

**f**, AJ2-30 inhibits production of IL-6 induced by wild-type mouse B cells 24 h after TLR7 and TLR9 stimulation.

**g**, AJ2-30 inhibits production of IgG2c from mouse B cells. *In vitro* IgG2c secretion from mouse B cells was measured by ELISA following B cell stimulation with CpG-B or R837 for 6 days.

Results are presented as the mean  $\pm$  s.d. of at least  $n = 3$  independent biological replicates from 3 independent experiments. Statistical analysis was performed using ANOVA analysis followed by multiple comparisons test. *P*-values are shown.

**a**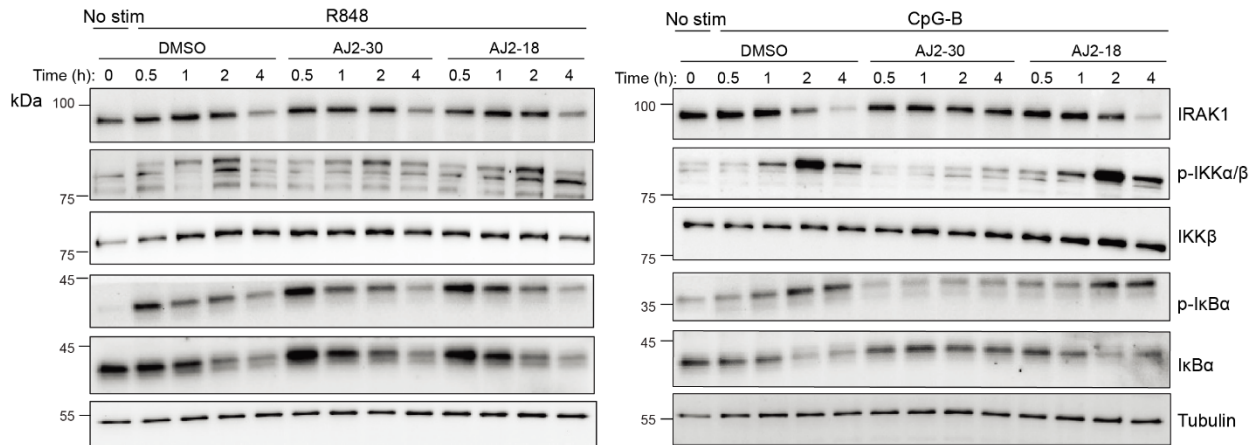**b**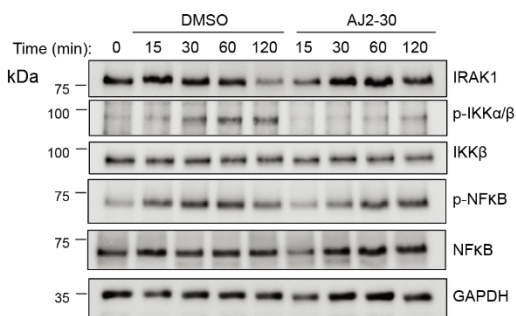**c**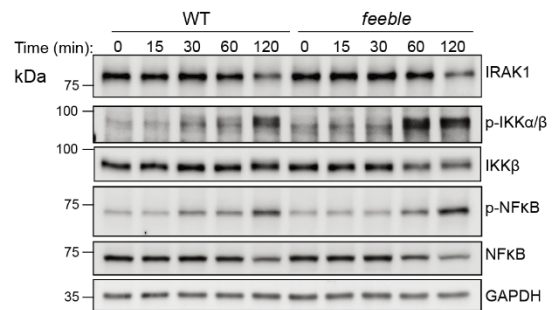

### Supplementary Fig. 6: Mechanistic characterization of SLC15A4 inhibition by AJ2-30.

**a**, Immunoblot analysis of TLR proximal signaling in human B cells isolated from PBMCs. Cells were co-treated with compounds (5  $\mu$ M) or DMSO and stimuli 5  $\mu$ g/ml R848 (left) or 1  $\mu$ M CpG-B (right) for indicated time points before lysis. Data are representative of three independent experiments.

**b**, Immunoblot analysis of TLR proximal signaling in WT mouse B cells. Cells were co-treated with AJ2-30 (5  $\mu$ M) /DMSO and stimuli 1  $\mu$ M CpG-B for indicated time points before lysis. Data are representative of two independent experiments.

**c**, immunoblot analysis of TLR proximal signaling in WT and *feebly* mouse B cells. Cells were stimulated with 1  $\mu$ M CpG-B for indicated time points before lysis. Data are representative of two independent experiments.

**a**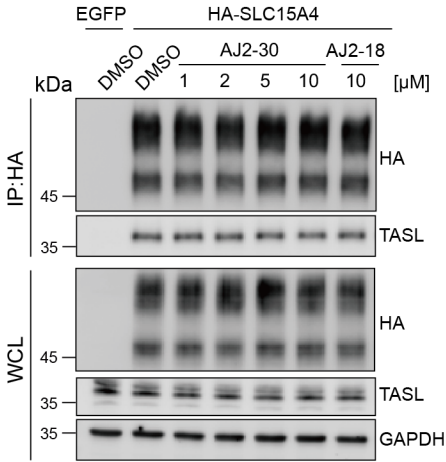**b**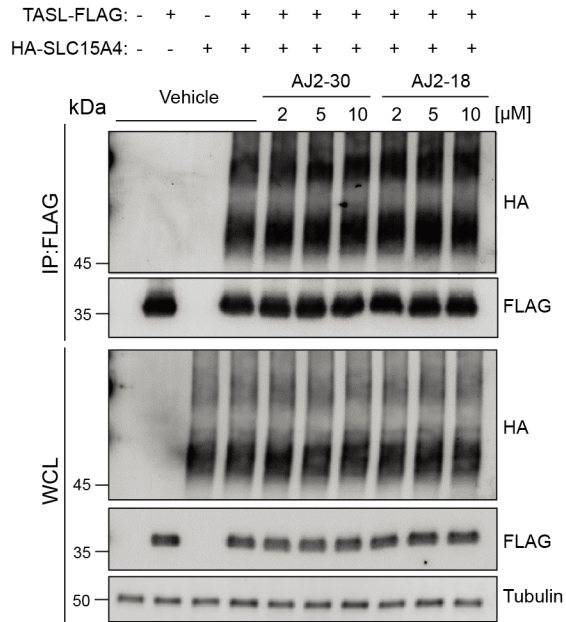

### Supplementary Fig. 7: Mechanistic characterization of SLC15A4 inhibition by AJ2-30.

**a**, CAL-1 cells expressing EGFP, HA-SLC15A4 cells were treated with compounds or DMSO for 1h. The whole cell lysates (WCL) from each condition were immunoprecipitated (IP) with anti-HA beads. WCL and immunoprecipitates were analyzed by immunoblot with indicated antibodies. Data are representative of three independent experiments.

**b**, SLC15A4/TASL interaction analysis by immunoprecipitation in HEK293T cells transiently overexpressing HA-SLC15A4 and FLAG-TASL. Data are representative of two independent experiments.



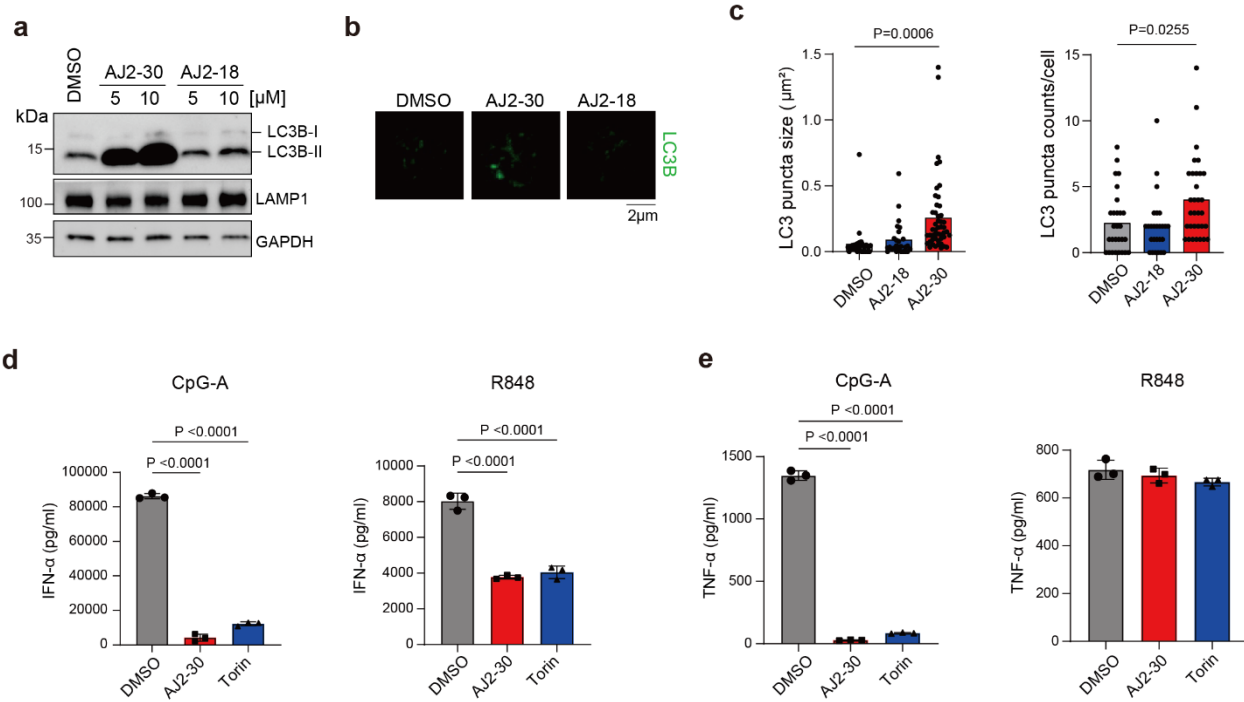

### Supplementary Fig. 8: Mechanistic characterization of SLC15A4 inhibition by AJ2-30.

**a**, Immunoblot analysis of LC3B in human B cells isolated from PBMCs. Cells were treated with indicated compounds or DMSO for 16h before lysis. Images are representative of two different donors.

**b**, Immunostaining of LC3B in human B cells isolated from PBMCs. Cells were co-treated with compounds (5 μM) or DMSO for 16h before fixation. Scale bar: 2 μm.

**c**, Quantitation of LC3B puncta size and numbers per cell ( $n = 28, 26, 48$  cells from left to right; mean  $\pm$  s.d.). Images are representative of two independent experiments (two healthy donors). Statistics were performed using ANOVA analysis.  $P$ -values are shown.

**d**, AJ2-30 and torin inhibit TLR9 and TLR7/8 mediated induction of IFN- $\alpha$  in primary pDCs. Data is plotted as the mean  $\pm$  s.d. ( $n = 3$  independent biological replicates). Statistics were performed using ANOVA analysis.  $P$ -values are shown.

**e**, AJ2-30 and torin inhibit TLR9 but not TLR7/8 mediated induction of TNF- $\alpha$  in primary pDCs. In Fig g and h, primary human pDCs were stimulated with CpG-A (1 μM) or R848 (5 μg/mL) and co-treated with DMSO, AJ2-30 (5 μM) or torin 1 (100nM) for 24 hrs. Cytokines were measured by ELISA. Data is plotted as the mean  $\pm$  s.d. ( $n = 3$  independent biological replicates). Statistics were performed using ANOVA analysis.  $P$ -values are shown.

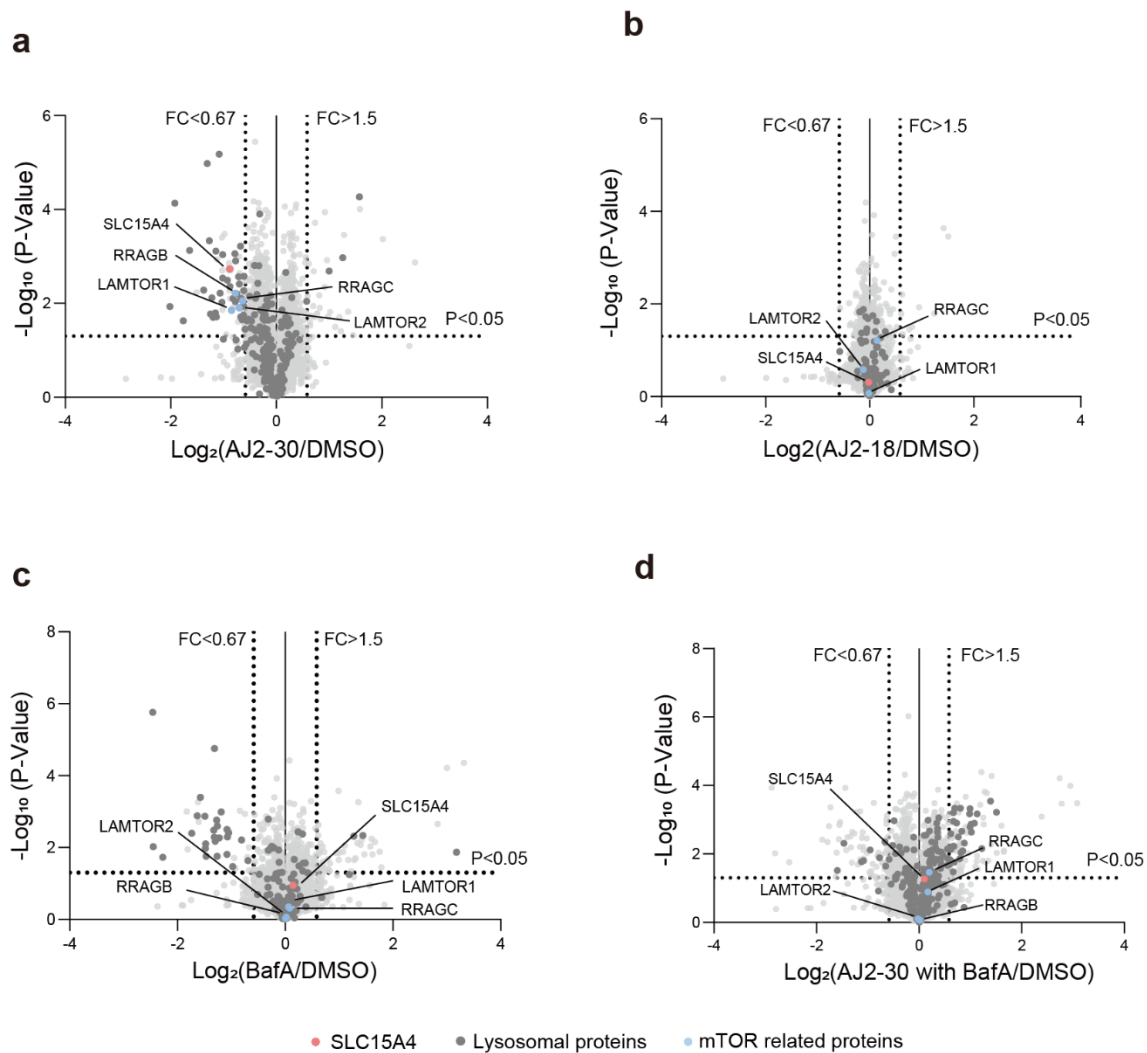

### Supplementary Fig. 9: AJ2-30 down-regulates SLC15A4 in human B cells.

**a**, Bafilomycin A blocks AJ2-30 degradation in CAL-1 cells. CAL-1 cells stably expressing HA-SLC15A4 were pre-treated with BafA for 1h and co-incubated with AJ2-30 (10  $\mu\text{M}$ ) or DMSO for 4h. HA-SLC15A4 abundance was determined by immunoblot. Images are representative of two independent experiments.

**b-d**, Bafilomycin A blocks AJ2-30 mediated degradation in human B cells, related to Figure 5c. Scatter plots depicting the relative fold change (FC) in protein abundance following treatment of human B cells with AJ2-30 (**i**, 10  $\mu\text{M}$ ), AJ2-18 (**j**, 10  $\mu\text{M}$ ), BafA (**k**, 500nM), or AJ2-30 (10  $\mu\text{M}$ ) and BafA (**l**, 500nM, pretreated 1 h) for 16 h. Lysosomal proteins are depicted by dark gray circles and SLC15A4 is displayed as a red circle. mTOR-related proteins that are down-regulated by AJ2-30 and can be rescued by BafA are shown as blue circles. Data presented as mean of  $n = 2$  biologically independent treatment samples. Associated data set provided in Supplementary Dataset.

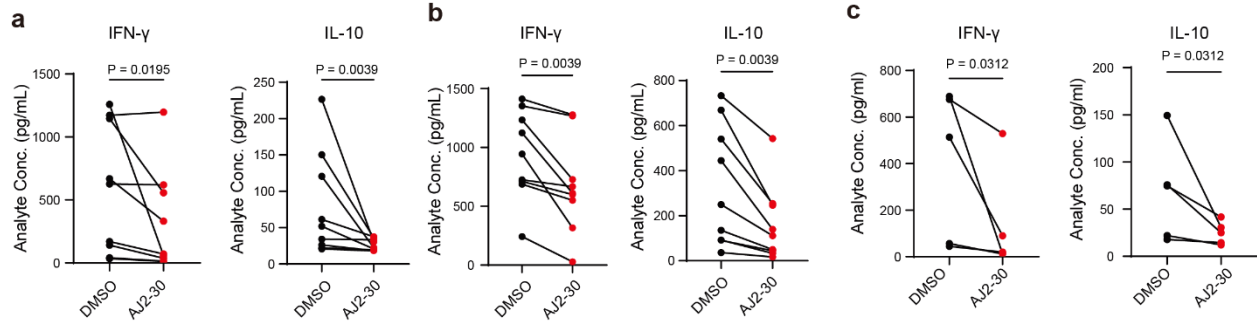

**Supplementary Fig. 10: Pharmacological inhibition of SLC15A4 suppresses inflammatory cytokine production in lupus patient derived PBMCs.**

**a**, Secretion of IFN- $\gamma$  and IL-10 from PBMCs of lupus patients in the presence of either DMSO or AJ2-30 (5  $\mu$ M) when stimulated by either CpG-B (1  $\mu$ M) after 24 h. n = 9 independent patient samples.

**b**, Secretion of IFN- $\gamma$  and IL-10 from PBMCs of lupus patients in the presence of either DMSO or AJ2-30 (5  $\mu$ M) when stimulated by R837 (10  $\mu$ g/mL) after 24 h. n = 9 independent patient samples.

**c**, Secretion of IFN- $\gamma$  and IL-10 of unstimulated PBMCs from lupus patients in the presence of either AJ2-30 (5  $\mu$ M) or DMSO for 24 h. n = 9 independent patient samples.

Supplementary Fig. 6a

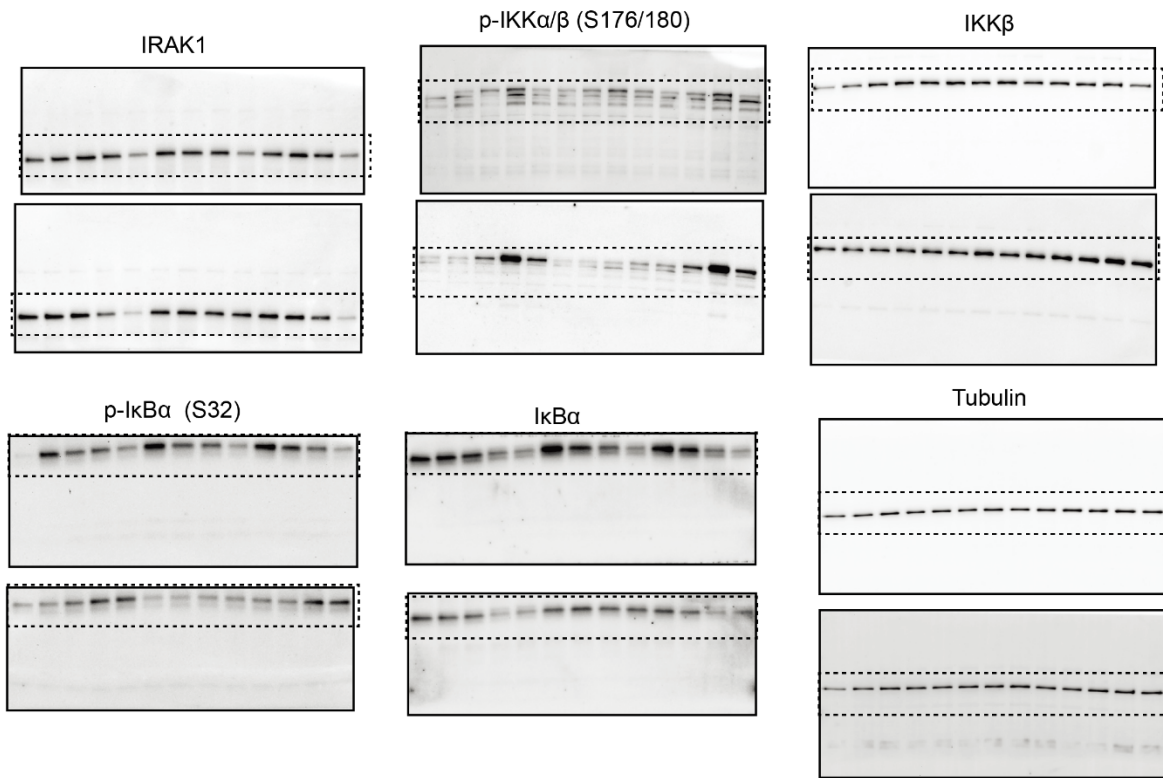

Supplementary Fig. 6b

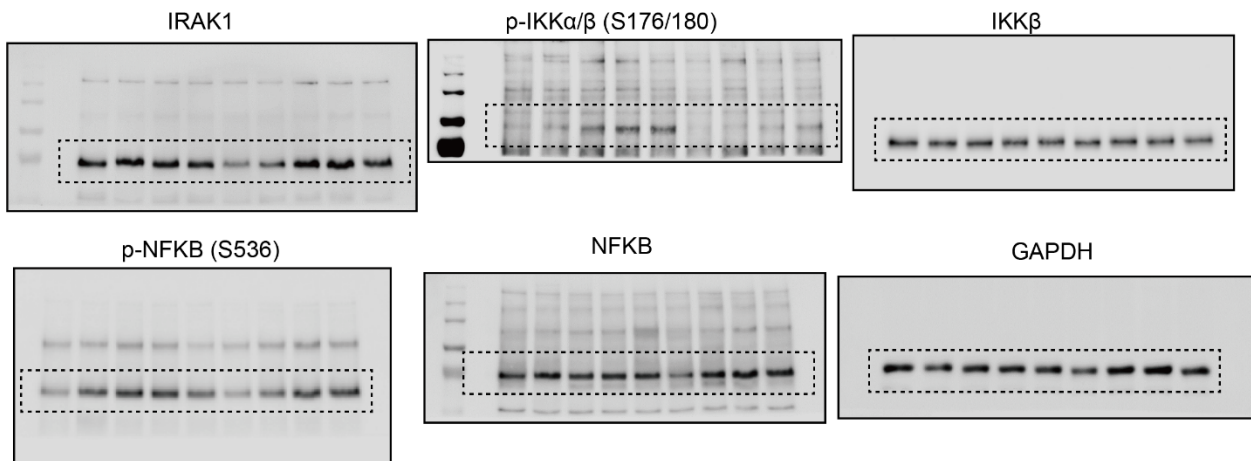

Supplementary Fig. 6c

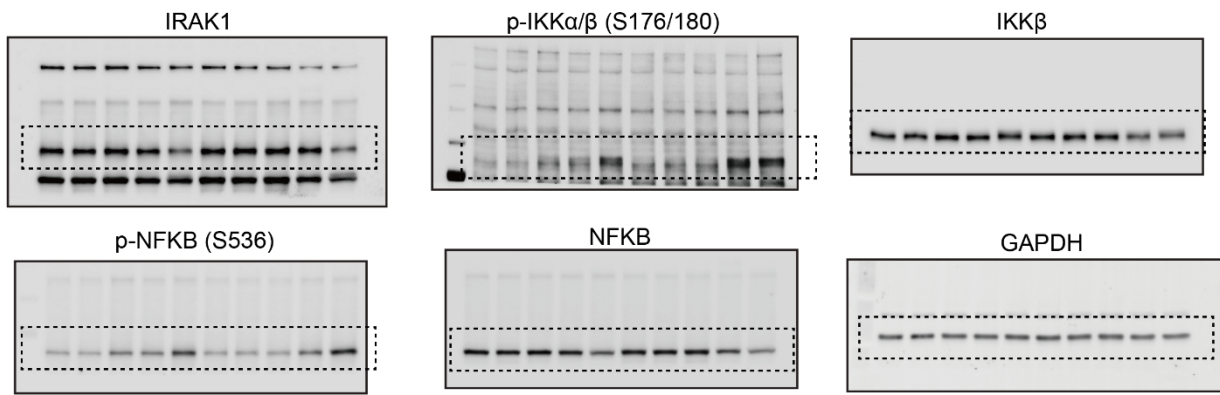

Supplementary Fig. 7a

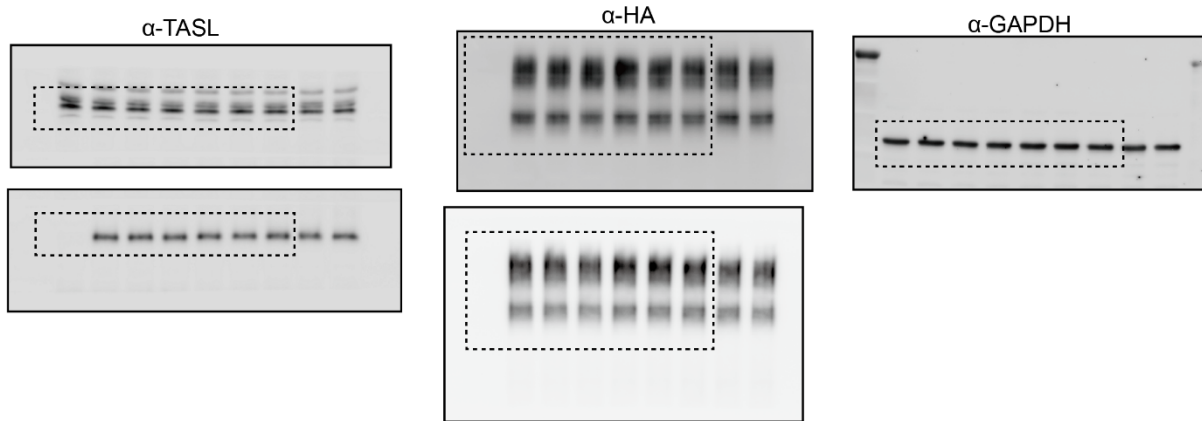

Supplementary Fig. 7b

Supplementary Fig. 8a

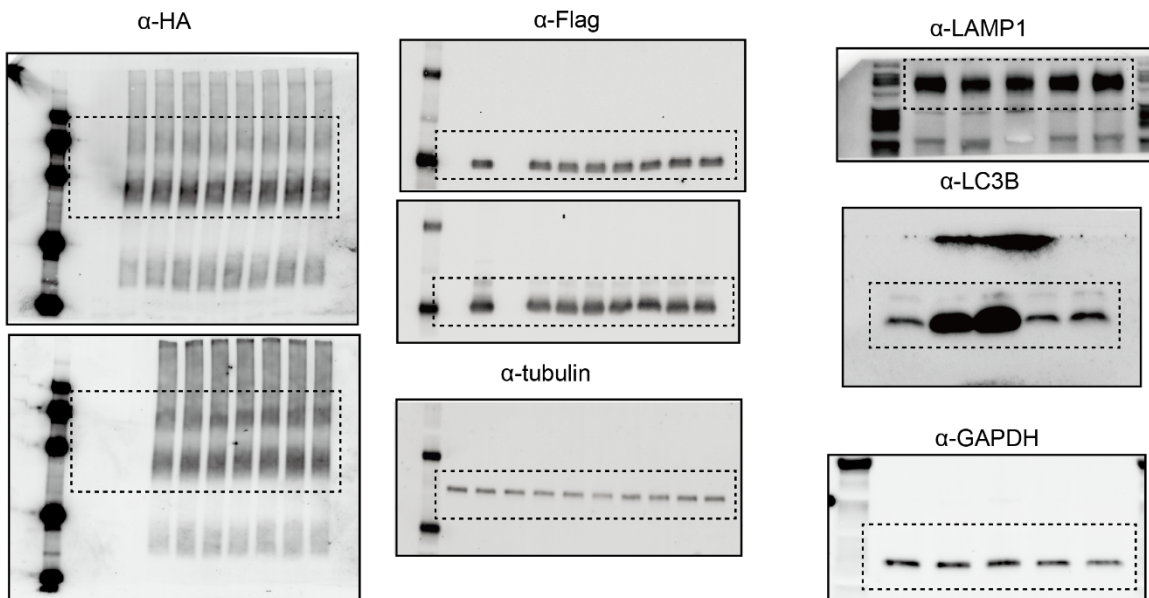

Supplementary Fig. 11: Uncropped western blots of supplementary figures.

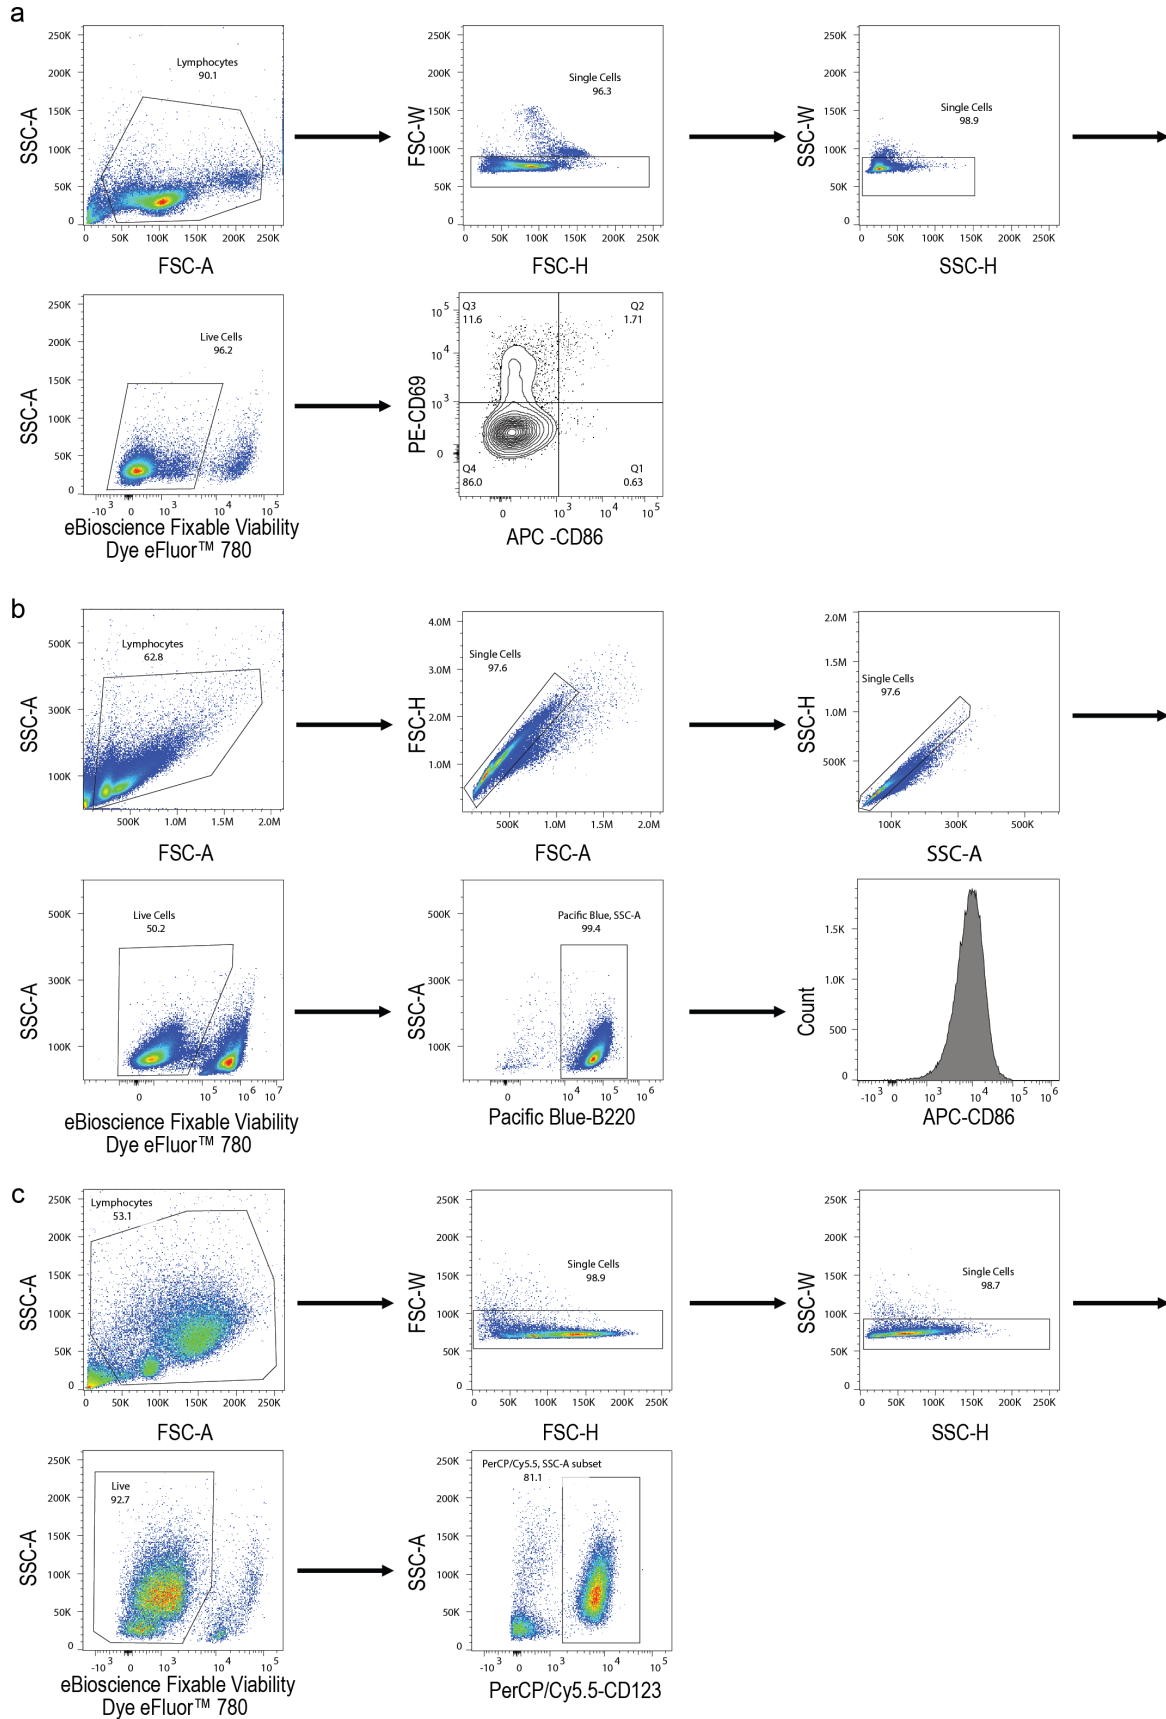



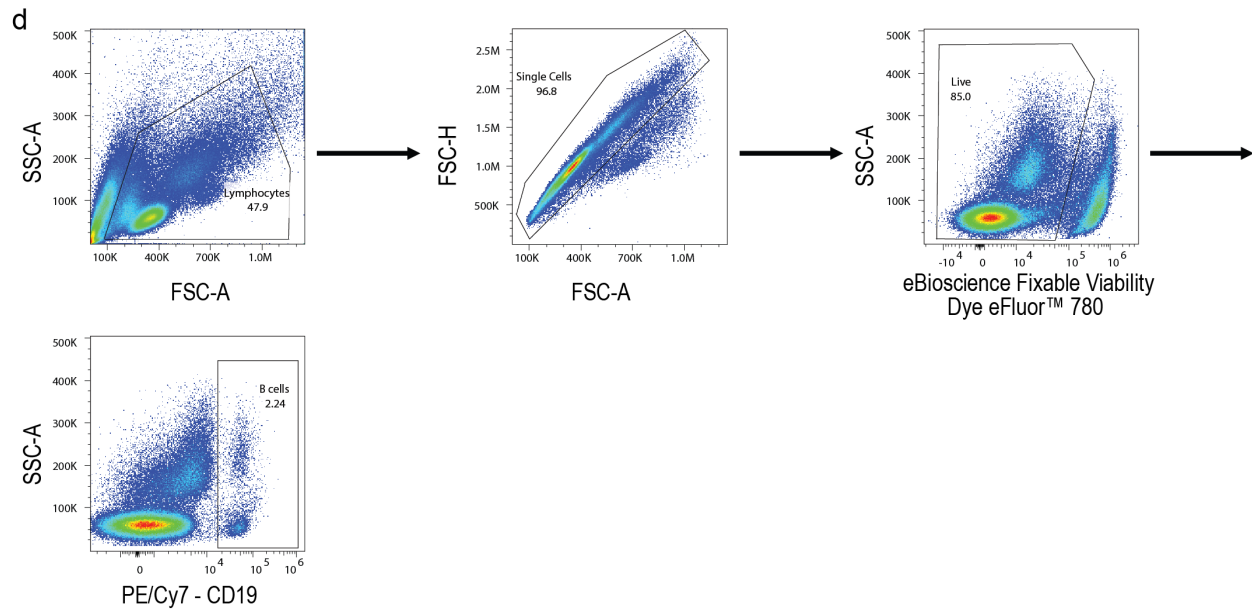

**Supplementary Fig. 12: Gating strategy for flow cytometry analysis.**

**a**, Human B Cell gating strategy for *Fig 3d-e* and *Supplementary Fig. 4d-e*: Lymphocyte population was identified using FSC-A/SSC-A gating. From the lymphocyte population, single cells were identified using both FSC and SSC Height vs. Width gates. From the single cell population, live cells were characterized using the eBioscience Fixable Viability Dye eFluor™ 780 marker. Downstream activation markers were gated on naïve, unstimulated cells.

**b**, Mouse B Cell gating strategy for *Fig. 4d-e*, and *Extended Data Fig. 3d and 4b*: Lymphocyte population was identified using FSC-A/SSC-A gating. From the lymphocyte population, the single cell population was identified using both FSC and SSC Height vs. Area gates. Live cells were identified from the single cell population using the eBioscience Fixable Viability Dye eFluor™ 780 marker, and the pure B cell population was identified the marker B220.

**c**, Human pDC gating strategy for *Extended Data Fig. 5a and 6c*: Lymphocyte population was identified using FSC-A/SSC-A gating. From the lymphocyte population, single cells were identified using both FSC and SSC Height vs. Width gates. Live cells were identified from the single cell population using the eBioscience Fixable Viability Dye eFluor™ 780 marker, and the pure pDC population was further identified using the marker CD123.

**d**, Representative Lupus patient gating strategy pertaining to *Extended Data Fig. 8*: Lymphocyte population was identified using FSC-A/SSC-A gating. From the lymphocyte population, single cells were identified using FSC-A versus FSC-H gating. Live cells were then identified using the eBioscience Fixable Viability Dye eFluor™ 780 marker from the single cell population. To identify the B cell population from the entire PBMC population, staining for the pan-B cell marker CD19 was employed. All subsequent FACS analysis was performed on this identified B cell population.

## SUPPLEMENTAL TABLES

**Supplementary Table 1: Inhibition of IFN- $\alpha$  production and SLC15A4 transport activity by analogs of FFF-15/21c.** For IFN- $\alpha$  quantitation, human pDCs were treated with CpG-A (1  $\mu$ M) and varying doses of compounds for 24 hours before analysis. For transport assay, reporter cells were treated with varying doses of compounds and MDP (500 ng ml<sup>-1</sup>) for 24 hours before analysis.

| Compound             | Structure                                                                           | IFN-I<br>IC <sub>50</sub> ( $\mu$ M) | MDP-NOD Reporter<br>Assay<br>IC <sub>50</sub> ( $\mu$ M) |
|----------------------|-------------------------------------------------------------------------------------|--------------------------------------|----------------------------------------------------------|
| FFF-21 ( <b>2</b> )  | 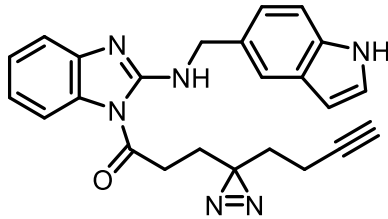   | ~21                                  | ~20                                                      |
| 21c ( <b>3</b> )     |   | ~32                                  | -                                                        |
| AJ2-10 ( <b>47</b> ) |  | 3.6                                  | 15.6                                                     |
| AJ2-13 ( <b>48</b> ) |  | ~20                                  | ~20                                                      |
| AJ2-14 ( <b>49</b> ) |  | >20                                  | >20                                                      |



|             |                                                                                     |      |     |
|-------------|-------------------------------------------------------------------------------------|------|-----|
| AJ2-29 (50) | 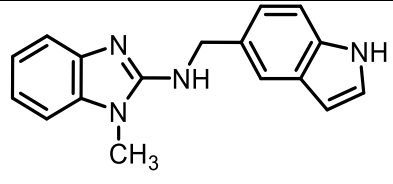   | 3.6  | 7.1 |
| AJ2-11 (51) |    | >20  | >20 |
| AJ2-38 (52) |    | 0.72 | -   |
| AJ2-3A (53) |   | 5.0  | 5.3 |
| AJ2-66 (54) |  | >20  | -   |
| AJ2-46 (55) |  | 1.5  | -   |
| AJ2-23 (56) |  | >20  | -   |

|             |                                                                                     |     |     |
|-------------|-------------------------------------------------------------------------------------|-----|-----|
| AJ2-8 (57)  | 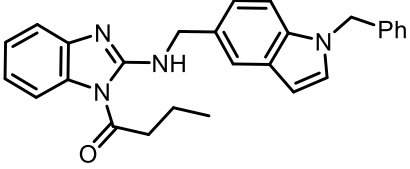   | 3.4 | -   |
| AJ2-27 (58) |    | >20 | >20 |
| AJ2-9 (59)  |    | >20 | -   |
| AJ2-5 (60)  |   | >20 | -   |
| AJ2-6 (61)  |  | >20 | >20 |
| AJ2-4 (62)  |  | >20 | >20 |
| AJ2-7 (63)  |  | >20 | >20 |

|             |                                                                                     |     |     |
|-------------|-------------------------------------------------------------------------------------|-----|-----|
| AJ2-25 (64) | 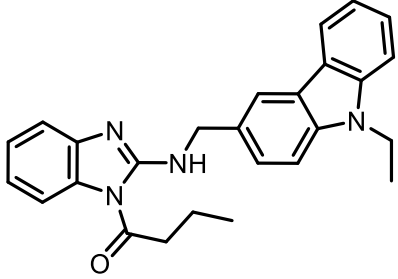   | 2.6 | -   |
| AJ2-30 (4)  |    | 1.8 | 2.6 |
| AJ2-2 (65)  |    | >20 | >20 |
| AJ2-22 (66) |   | >20 | >20 |
| AJ2-74 (67) |  | >20 | -   |
| AJ2-18 (6)  |  | >20 | >20 |
| AJ2-90 (7)  |  | >20 | >20 |

|             |                                                                                                                                                                                                                                                                                                                                                                                                                                                                     |     |     |
|-------------|---------------------------------------------------------------------------------------------------------------------------------------------------------------------------------------------------------------------------------------------------------------------------------------------------------------------------------------------------------------------------------------------------------------------------------------------------------------------|-----|-----|
| AJ2-26 (68) | 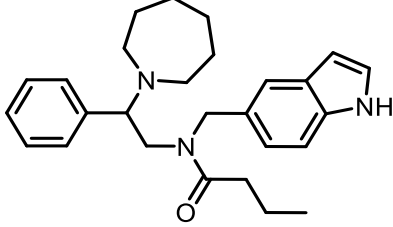 <p>The chemical structure shows a piperazine ring system. One nitrogen atom of the piperazine is substituted with a phenyl group. The other nitrogen atom is substituted with a propylamide group (-NH-CH2-CH2-CH3). The piperazine ring is further substituted at the 2-position with a 2-(propylamino)ethyl group, which is in turn substituted with an indole ring system.</p> | >20 | >20 |
|-------------|---------------------------------------------------------------------------------------------------------------------------------------------------------------------------------------------------------------------------------------------------------------------------------------------------------------------------------------------------------------------------------------------------------------------------------------------------------------------|-----|-----|

**Supplementary Table 2: SLE Patients information.** Lupus patient samples were obtained through StemCell Technologies Diseased Human Peripheral Blood Mononuclear Cells Catalog.

| <b>Donor ID</b> | <b>Date of Draw</b> | <b>Age</b> | <b>Sex</b> | <b>Ethnicity</b> | <b>Weight (kg)</b> | <b>Height (cm)</b> | <b>Smoking Status</b> | <b>Blood Type</b> | <b>Year of Diagnosis</b> | <b>Current Medication</b>                                                               |
|-----------------|---------------------|------------|------------|------------------|--------------------|--------------------|-----------------------|-------------------|--------------------------|-----------------------------------------------------------------------------------------|
| <b>RG1817</b>   | 9/17/20             | 47         | F          | Caucasian        | 83                 | 157                | Smoker                | A-                | 2016                     | Levothyroxine                                                                           |
| <b>RG1814</b>   | 10/29/20            | 55         | M          | Caucasian        | 95                 | 178                | Non-smoker            | A+                | 2013                     | Topro-XL                                                                                |
| <b>RG2551</b>   | 10/30/20            | 67         | F          | Caucasian        | 96                 | 168                | Non-smoker            | A+                | 2010                     | Cymbalta, Hydroxychloroquine, Levothyroxine, Lisinopril, Mobic, Prilosec                |
| <b>RG1342</b>   | 11/9/20             | 54         | F          | Caucasian        | 57                 | 165                | Non-smoker            | O+                | 2013                     | Insulin, Loestrin                                                                       |
| <b>RG3041</b>   | 2/5/21              | 48         | F          | Caucasian        | 83                 | 168                | Non-smoker            | N/A               | 2019                     | Gabapentin, Lexapro, Methotrexate                                                       |
| <b>RG3195</b>   | 5/19/21             | 42         | F          | Caucasian        | 128                | 155                | Smoker                | N/A               | 2020                     | Allergy Shot, Folic acid, Hydrocodone, Levothyroxine, Linzess, Methotrexate, Tizanidine |
| <b>RG1166</b>   | 2/4/22              | 49         | F          | Caucasian        | 85                 | 157                | Non-smoker            | A+                | 2015                     | Crestor, Fenofibrate, Lyrica, Metformin, Vascepa, Zyrtec, Estradile                     |
| <b>RG3502</b>   | 2/8/22              | 30         | F          | Caucasian        | 131                | 165                | Non-smoker            | A+                | 2006                     | Albuterol inhaler, Iron Supplement, Prenatal Vitamins, Zinc, Vitamin A, C, and D        |
| <b>RG2261</b>   | 5/3/22              | 59         | F          | Caucasian        | 77                 | 157                | Non-smoker            | O+                | 2015                     | None                                                                                    |

**Supplementary Table 3: reagents table**

| REAGENT                                                 | SOURCE                    | IDENTIFIER |
|---------------------------------------------------------|---------------------------|------------|
| <b>Antibodies</b>                                       |                           |            |
| Anti-Lamtor1 (IB 1:1000)                                | Cell Signaling Technology | #8975      |
| Anti-Lamtor2 (IB 1:1000)                                | Cell Signaling Technology | #8145      |
| Anti-LC3B (IB 1:2000)                                   | Cell Signaling Technology | #83506     |
| Anti-RRAGC (IB 1:1000)                                  | Proteintech               | 26989-1-AP |
| Anti-ATP6V1B2 (IB 1:1000)                               | Proteintech               | 15097-1-AP |
| Anti-ATP6V0D1 (IB 1:1000)                               | Proteintech               | 18274-1-AP |
| Anti-STX7 (IB 1:5000)                                   | Proteintech               | 12322-1-AP |
| Anti-ATP6V0A3 (TCIRG1) (IB 1:2000)                      | Sigma-Aldrich             | HPA038742  |
| Anti-CXorf21(TASL) antibody (IB 1:2000)                 | ABclonal                  | # A20486   |
| HA-Tag mAb (IB 1:2000)                                  | Cell Signaling Technology | #3724      |
| p70 S6 Kinase mAb (IB 1:1000)                           | Cell Signaling Technology | #34475     |
| P-p70 S6 Kinase (T389) mAb (IB 1:500)                   | Cell Signaling Technology | #9234      |
| IRF-5 mAb (IB 1:500, IF 1:200)                          | Cell Signaling Technology | #96527     |
| IRF-7 mAb (IF 1:200)                                    | Santa Cruz Biotechnology  | sc-74472   |
| IRF-7 mAb (IB:1:1000)                                   | Abcam                     | Ab238137   |
| LC3B                                                    | Abcam                     | ab48394    |
| 4E-BP1 mAb (IB 1:1000)                                  | Cell Signaling Technology | #9644      |
| P-4E-BP1 (S65) mAb (IB 1:1000)                          | Cell Signaling Technology | #13443     |
| I $\kappa$ B $\alpha$ (IB 1:500)                        | Cell Signaling Technology | #4814      |
| p-I $\kappa$ B $\alpha$ (S32) mAb (IB 1:500)            | Cell Signaling Technology | #2859      |
| p- IKK $\alpha$ / $\beta$ (Ser176/180) (IB 1:500)       | Cell Signaling Technology | #2697      |
| IKK $\beta$ mAb (IB 1:1000)                             | Cell Signaling Technology | #8943      |
| IRAK1 (IB 1:300)                                        | Cell Signaling Technology | #4359      |
| Anti-Flag mAb (IB 1:1000)                               | Cell Signaling Technology | #14793     |
| Anti-Tubulin hFAB (IB 1:3000)                           | Bio-Rad                   | #12004165  |
| Donkey anti-Mouse IgG, Alexa Fluor Plus 488 (IF 1:500)  | Thermo Fisher Scientific  | A32766TR   |
| Donkey anti-Rabbit IgG, Alexa Fluor Plus 647 (IF 1:500) | Thermo Fisher Scientific  | A32795TR   |

|                                                                        |                          |             |
|------------------------------------------------------------------------|--------------------------|-------------|
| Rabbit anti-Mouse IgG, HRP (IB 1:10000)                                | Thermo Fisher Scientific | PA1-28568   |
| Goat anti-Rabbit IgG, HRP (IB 1:10000)                                 | Thermo Fisher Scientific | 31460       |
| NucBlue™ Fixed Cell ReadyProbes™ Reagent (DAPI)                        | Thermo Fisher Scientific | R37606      |
| LysoSensor Green DND-189                                               | Thermo Fisher Scientific | L7535       |
| eBioscience Fixable Viability Dye eFluor™ 780                          | Thermo Fisher Scientific | 65-0865-18  |
| BV421 anti-human CD80 (Clone 2D10) (FC 1:200)                          | Biolegend                | 305222      |
| AlexaFluor488 anti-human HLA-DR (Clone LN3) (FC 1:200)                 | Biolegend                | 327010      |
| PE anti-human CD69 (Clone FN50) (FC 1:200)                             | Biolegend                | 310906      |
| APC anti-human CD86 (Clone IT2.2) (FC 1:200)                           | Biolegend                | 305412      |
| PE/Cy7 anti-human CD19 (Clone HIB19) (FC 1:200)                        | Biolegend                | 302216      |
| BV421™ anti-mouse/human CD45R/B220 Antibody (Clone RA3-6B2) (FC 1:200) | Biolegend                | 103240      |
| PE anti-mouse CD69 (Clone H1.2F3) (FC 1:200)                           | Biolegend                | 104508      |
| APC anti-mouse CD86 (Clone GL-1) (FC 1:200)                            | Biolegend                | 105012      |
| PerCP/Cy5.5 anti-mouse CD80 (Clone 16-10A1) (FC 1:200)                 | Biolegend                | 104722      |
| PerCP/Cy5.5 anti-human CD123 (Clone 6H6) (FC 1:200)                    | Biolegend                | 306016      |
| PE anti-human CD303 (BDCA-2) (Clone 201A) (FC 1:200)                   | Biolegend                | 354204      |
| IRF-7 pS477/pS479 Antibody, anti-human, REAfinity™ (FC 1:100)          | Miltenyi Biotec          | 130-104-702 |

|                                                                                  |                                    |                                                     |
|----------------------------------------------------------------------------------|------------------------------------|-----------------------------------------------------|
| Anti-hu/mo phospho-mTOR (Ser2448)-PE (FC 1:100)                                  | Thermo Fisher Scientific           | 12-9718-42                                          |
| phospho-S6 ribosomal Protein (S235/236) XP-PeCy7 (FC 1:100)                      | Cell Signaling Technology          | 34411S                                              |
| phospho-4E-BP1 (T37/46) AlexaFluor647 (FC 1:100)                                 | Cell Signaling Technology          | 5123S                                               |
| LAMP2 Recombinant Rabbit Monoclonal Antibody (ARC0274)                           | Invitrogen                         | MA5-35052                                           |
| hFAB™ Rhodamine Anti-GAPDH Primary Antibody (IB 1:10000)                         | Bio-Rad                            | #12004168                                           |
| mTOR (7C10) Rabbit mAb (IF 1:200)                                                | Cell Signaling Technology          | 2983T                                               |
| Purified anti-human CD107a (LAMP-1) Antibody (IF 1:500; clone H4A3)              | Biolegend                          | 328601                                              |
| TLR9 antibody (26C593.2) - BSA Free (IF 1:200)                                   | Novus Biologicals                  | NBP2-24729                                          |
| Phospho-Stat1 (Tyr701) (58D6) Rabbit mAb (Alexa Fluor® 488 Conjugate) (FC 1:100) | Cell Signaling Technology          | 9174S                                               |
| <b>Experimental models: Cell Lines</b>                                           |                                    |                                                     |
| 293T                                                                             | ATCC                               | CRL-3216                                            |
| A549                                                                             | ATCC                               | CCL-185                                             |
| CAL-1                                                                            | S. Kamihira, (Nagasaki University) | PMID: 15765784                                      |
| CAL-1::EGFP                                                                      | In this study                      | CAL-1 stably overexpressing EGFP                    |
| CAL-1::HA-SLC15A4                                                                | In this study                      | CAL-1 stably overexpressing HA tagged SLC15A4       |
| CAL-1::V5-APEX2-SLC15A4                                                          | In this study                      | CAL-1 stably overexpressing V5-APEX2 tagged SLC15A4 |



|                                                    |                          |             |
|----------------------------------------------------|--------------------------|-------------|
| THP-1 Dual                                         | InvivoGen                | thpd-nfis   |
| <b>Critical commercial assays</b>                  |                          |             |
| Quanti-Luc™-Gold                                   | InvivoGen                | rep-qlcg1   |
| Quanti-Blue™                                       | InvivoGen                | rep-qbs     |
| Trans-Blot Turbo RTA transfer Kit, LF, PVDF        | BioRad                   | #1704275    |
| CellTiter-Glo Luminescent Cell Viability Assay     | Promega                  | G7570       |
| CytoTox 96® Non-Radioactive Cytotoxicity Assay     | Promega                  | G1780       |
| Human IFN-Beta ELISA Kit                           | pbl Assay Science        | 41410-2     |
| Human IFN-Alpha ELISA Kit                          | pbl Assay Science        | 41100-2     |
| Mouse IFN-Alpha ELISA Kit                          | pbl Assay Science        | 42120-2     |
| ELISA MAX™ Deluxe Set Human TNF- $\alpha$          | Biolegend                | 430204      |
| ELISA MAX™ Deluxe Set Mouse IL-6                   | Biolegend                | 431304      |
| ELISA MAX™ Deluxe Set Mouse TNF- $\alpha$          | Biolegend                | 430904      |
| IgG (Total) Human Uncoated ELISA Kit with Plates   | Thermo Fisher Scientific | 88-50550-22 |
| IgG2c Mouse Uncoated ELISA Kit with Plates         | Thermo Fisher Scientific | 88-50670-22 |
| IgM Mouse Uncoated ELISA Kit with Plates           | Thermo Fisher Scientific | 88-50470-22 |
| Bio-Plex Pro Mouse Cytokine 23-plex assay          | Bio-Rad                  | M60009RDPD  |
| Bio-Plex Pro Human Cytokine 27-plex Assay          | Bio-Rad                  | M500KCAF0Y  |
| RNeasy Plus Mini Kit                               | Qiagen                   | 74134       |
| TURBO DNA-free™ Kit                                | Thermo Fisher Scientific | AM1907      |
| M-MLV Reverse Transcriptase (200 U/ $\mu$ L)       | Thermo Fisher Scientific | 28025013    |
| Fast SYBR™ Green Master Mix                        | Thermo Fisher Scientific | 4385612     |
| <b>Reagents, Peptides and Recombinant proteins</b> |                          |             |
| TMT10plex™ Isobaric label reagent set              | Thermo Fisher Scientific | 90110       |

|                                                  |                          |              |
|--------------------------------------------------|--------------------------|--------------|
| TMTpro™ 16plex label reagent set                 | Thermo Fisher Scientific | A44522       |
| Biotin-PEG3-Azide                                | Click Chemistry Tools    | AZ104        |
| Pierce Streptavidin Agarose                      | Thermo Fisher Scientific | 20353        |
| Pierce High pH Reversed-Phase Fractionation Kit  | Thermo Fisher Scientific | 84868        |
| HA peptide                                       | GenScript                | RP11735      |
| PEI MAX                                          | Polysciences Inc.        | 24765-1      |
| Rhodamine-azide                                  | Synthesized in lab       | -            |
| Triptolide                                       | AdipoGen Life Sciences   | 501146334    |
| GSK583, RIPK2i                                   | MedChemExpress           | HY-100339    |
| NOD2 Signaling Inhibitor II, GSK717              | EMD Millipore            | 5.33718.0001 |
| R848 (Resiquimod)                                | InvivoGen                | tlrl-848     |
| Imiquimod (R837)                                 | InvivoGen                | tlrl-imq     |
| VACV-70/ LyoVec™                                 | InvivoGen                | tlrl-vav70n  |
| Pam3CSK4                                         | InvivoGen                | tlrl-pms     |
| Standard LPS, E. coli K12                        | InvivoGen                | tlrl-eklps   |
| ODN 2216                                         | InvivoGen                | tlrl-2216-5  |
| ODN 2006 (ODN 7909)                              | InvivoGen                | tlrl-2006-5  |
| LL-37 (Antimicrobial peptide)                    | InvivoGen                | tlrl-l37     |
| Muramyl dipeptide (L-D isoform, active)          | InvivoGen                | tlrl-mdp     |
| Tri-DAP                                          | InvivoGen                | tlrl-tdap    |
| DNeasy Blood & Tissue Kit                        | Qiagen                   | 69504        |
| QIAprep Spin Miniprep Kit (250)                  | Qiagen                   | 27106        |
| EndoFree Plasmid Maxi Kit                        | Qiagen                   | 12362        |
| Pierce Anti-HA Magnetic Beads                    | Thermo Fisher Scientific | 88837        |
| Sequencing Grade Modified Trypsin                | Promega                  | V5111        |
| Endoproteinase LysC                              | New England Biolabs      | P8109        |
| DOTAP Liposomal Transfection Reagent             | Roche                    | 11202375001  |
| CD304 (BDCA-4/Neuropilin-1) MicroBead Kit, human | Miltenyi Biotec          | 130-090-532  |
| EasySep™ Human B Cell Isolation Kit              | StemCell Technologies    | 17954        |
| EasySep™ Mouse B Cell Isolation Kit              | StemCell Technologies    | 19854        |

|                                                 |                          |              |
|-------------------------------------------------|--------------------------|--------------|
| EasySep™ Human Monocyte Isolation Kit           | StemCell Technologies    | 19359        |
| EasySep™ Mouse CD11c Positive Selection Kit II  | StemCell Technologies    | 18780        |
| ACK lysing buffer (RBC Lysis)                   | Quality Biological Inc.  | 118-156-101  |
| Recombinant Human IFN-gamma                     | R&D Systems              | 285-IF       |
| Human Recombinant M-CSF                         | StemCell Technologies    | 78057.1      |
| Flt-3L-Ig                                       | BioXcell                 | BE0098       |
| Mouse M-CSF                                     | Fisher Scientific        | 416ML010     |
| GM-CSF                                          | Fisher Scientific        | 41-5ML0-05CF |
| eBioscience Fixable Viability Dye eFluor™ 780   | Thermo Fisher Scientific | 65-0865-14   |
| Halt Protease Inhibitor                         | Thermo Fisher Scientific | 78438        |
| Pierce Quantitative Fluorometric Peptide Assays | Thermo Fisher Scientific | 23290        |
| ProteaseMAX™ Surfactant, Trypsin Enhancer       | Promega                  | V2072        |
| Pierce C18 Spin Columns                         | Thermo Fisher Scientific | 89873        |
| Dynabeads® M-280 Sheep anti-Rabbit IgG          | Thermo Fisher Scientific | 11203D       |
| Chloroquine diphosphate salt                    | Sigma                    | C6628        |
| Bafilomycin A1                                  | Selleck Chemicals        | S1413        |
| EnzChek™ Phosphate Assay Kit                    | Thermo Fisher Scientific | E6646        |
| Torin 1                                         | Selleck Chemicals LLC    | S2827        |
| <b>Recombinant DNA</b>                          |                          |              |
| pDONR221_SLC15A4                                | Addgene                  | #131910      |
| pLJM1-EGFP                                      | Addgene                  | #19319       |
| Cxorf21 (TASL)                                  | GPS core UF Scripps      | 476835       |
| Human SLC15A4 (Codon Optimized)                 | IDT                      |              |
| Human SLC15A3 (Codon Optimized)                 | IDT                      |              |
| Mouse SLC15A4 (Codon Optimized)                 | IDT                      |              |
| Human NOD2 (Codon Optimized)                    | IDT                      |              |
| <b>Software and Algorithms</b>                  |                          |              |

|                            |                          |   |
|----------------------------|--------------------------|---|
| Proteome Discoverer (v2.4) | Thermo Fisher Scientific | - |
| GraphPad                   | Dotmatics                | - |
| FlowJo™ (v10)              | FlowJo                   | - |
| NovoCyte (v1.2.5)          | ACEA Bioscience. Inc.    | - |
| Xcalibur (v4.1.50)         | Thermo Fisher Scientific | - |
| Carl Zeiss AG, ZEN (v2.3)  | Zeiss Microscopy         | - |
| Imagelab (Version 6.1.0)   | Bio-Rad laboratories     | - |
| QuantStudio (v1.3)         | Thermo Fisher Scientific | - |
| ChemDraw (21.0.0.28)       | Revvity signals          | - |
| MestReNova (14.0.0)        | Mestrelab Research       | - |
| Phoenix WinNonlin 6.3.     | Certara                  | - |
| Excel (v2310)              | Microsoft                | - |
| Prism (v9.3.0).            | GraphPad                 | - |

## NMR spectra

### I. Synthetic Methods:

#### (A) Chemistry material

Chemicals and reagents were purchased from commercial vendors, including Sigma-Aldrich, Fisher Scientific, Combi-Blocks, MedChemExpress, Alfa Aesar and AstaTech, and were used as received without further purification, unless otherwise noted. Anhydrous solvents were purchased from Sigma-Aldrich in Sure/Seal™ formulations. All reactions were monitored by thin-layer chromatography (TLC, Merck silica gel 60 F-254 plates). The plates were stained either with *p*-anisaldehyde (2.5% *p*-anisaldehyde, 1% AcOH, 3.5% H<sub>2</sub>SO<sub>4</sub> (conc.) in 95% EtOH), ninhydrin (0.3% ninhydrin (w/v), 97:3 EtOH-AcOH), KMnO<sub>4</sub> (1.5g of KMnO<sub>4</sub>, 10g K<sub>2</sub>CO<sub>3</sub>, and 1.25mL 10% NaOH in 200mL water), iodine or directly visualized with UV light. Reaction purification was carried out using Flash chromatography (230 – 400 mesh silica gel), and Biotage® or preparative thin layer chromatography (pTLC, Analtech, 500-2000 μm thickness). NMR spectra were recorded on Bruker DPX-400 MHz, Bruker AV-500 MHz, Bruker AV-600 MHz spectrometers in the indicated solvent. Multiplicities are reported with the following abbreviations: s singlet; d doublet; t triplet; q quartet; p pentet; m multiplet; br broad; dd doublet of doublets; dt doublet of triplets; td triplet of doublets. Chemical shifts are reported in ppm relative to the residual solvent peak and J values are reported in Hz. Mass spectrometry data were collected on an Agilent 6120 single-quadrupole LC/MS instrument (ESI, low resolution) or an Agilent ESI-TOF instrument (ESI-TOF, HRMS).

#### (B) Synthetic Procedures:

##### 1) General synthetic procedure of diazirine containing FFF (Fully Functionalized Fragments) Scheme 1:

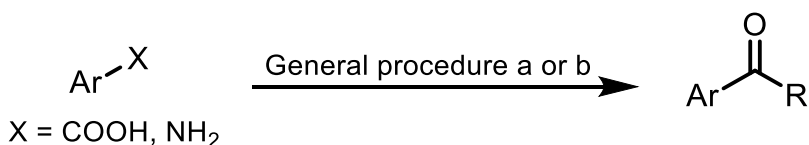

**General Procedure a:** To a solution of corresponding commercially available carboxylic acid (0.113 mmol) in 3 ml DCM, the corresponding diazirine amine (0.118 mmol), DIPEA (0.354 mmol), EDC-HCl (0.177 mmol), and HOBt (0.177 mmol) were added. The reaction mixtures were stirred at room temperature for 14 to 16 hr. After completion (monitored by TLC) the crude reaction mixture was diluted with DCM (20 mL) and washed first with saturated aqueous NH<sub>4</sub>Cl (10 mL) and saturated aqueous NaHCO<sub>3</sub> (10 mL) solution, dried over anhydrous Na<sub>2</sub>SO<sub>4</sub> and volatiles removed by rotary evaporation. Crude products were purified by PTLC or Biotage® SNAP Cartridge KP-Sil Snap 10g with linear gradient of ethyl acetate and hexane over 20 column volumes (CV).

**General Procedure b:** To a solution of corresponding commercially available amine (0.113 mmol) in 3 ml DCM, the corresponding diazirine acid (0.118 mmol), DIPEA (0.354 mmol), EDC-HCl (0.177 mmol), and HOBt (0.177 mmol) were added. The reaction mixtures were stirred at room temperature for 14 to 16 hr. After completion (monitored by TLC) the crude reaction mixture was diluted with DCM (20 mL) and washed first with saturated aqueous NH<sub>4</sub>Cl (10 mL) and saturated aqueous NaHCO<sub>3</sub> (10 mL) solution, dried over anhydrous Na<sub>2</sub>SO<sub>4</sub> and volatiles removed by rotary

evaporation. Crude products were purified by PTLC or Biotage® SNAP Cartridge, KP-Sil, 10g with linear gradient of ethyl acetate and hexane over 20 column volumes (CV).

## 2) General Synthetic Scheme 2:

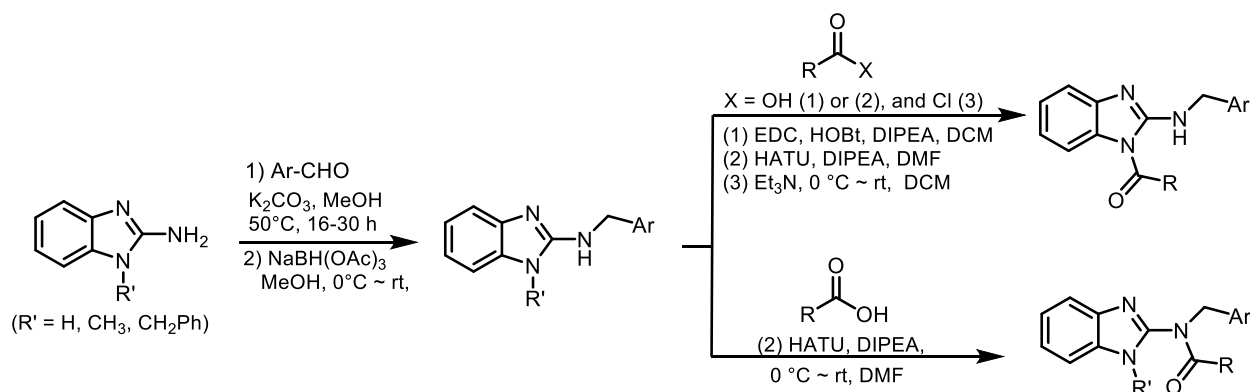

### General Procedure 1: coupling procedure for the synthesis of benzo[d]imidazole amine intermediate (S1)

Synthesized according to reported procedure<sup>3</sup>, to a dried round bottom flask containing solution of commercially available 2-aminobenzimidazole, or 2-amino-1-methylbenzimidazole, or 2-aminoindane derivatives (1.0 eq.) and corresponding aldehyde (1.0 eq.) in dry methanol, potassium carbonate (3.0 eq.) was added, and the reaction mixture was heated at  $50^\circ C$  for 16 to 30 h. The solvent was filtered to remove the excess potassium carbonate and sodium triacetoxyborohydride (2.0 eq.) was added at  $0^\circ C$  to the solution and resulting mixture was stirred for 8 h at room temperature. After completion (monitored by TLC) the solvent was removed by rotary evaporation, crude mixture was diluted with water and washed with saturated aqueous  $NaHCO_3$  solution extracted in ethyl acetate, the combined extract was dried over  $Na_2SO_4$ , filtered and concentrated in vacuum, purified by flash column chromatography on Biotage® isolera one instrument to give corresponding amines intermediate (S1).

### General Procedure 2: Coupling of amines intermediate with acid

To a vial containing corresponding amine intermediate (1 eq.) in dichloromethane (60 mM relative to S1), commercially available butyric acid or 3-(3-(but-3-yn-1-yl)-3H-diazirin-3-yl)propanoic acid (1.1 eq.), N, N-diisopropylethylamine (3.0 eq.), EDC-HCl (1.5 eq.) and HOBT (1.5 eq.) were added and stirred at room temperature for 4 h to overnight. After completion (monitored by TLC) the crude mixture was diluted with dichloromethane, saturated aqueous  $NH_4Cl$  solution was added and extracted in dichloromethane. The combined extract was washed with saturated aqueous  $NaHCO_3$  solution, extracted in dichloromethane dried over anhydrous  $Na_2SO_4$ , and volatiles removed by rotary evaporation. Crude products were purified by PTLC or flash column chromatography on Biotage® isolera one instrument to give the corresponding products.

### General Procedure 3: Coupling of amines intermediate with acid

To a solution of corresponding butyric acid or 3-(3-(but-3-yn-1-yl)-3H-diazirin-3-yl)propanoic acid (1.1 eq.) and amine intermediate (1.0 eq.) in dimethylformamide (60 mM relative to S1), the N, N-diisopropylethylamine (3.0 eq.) and HATU (1.1 eq.) were added at  $0^\circ C$  and resulting mixture was stirred at room temperature until amines were fully consumed, as indicated by TLC. The

crude mixture was diluted with cold water and extracted in ethyl acetate then combined extract were dried over anhydrous Na<sub>2</sub>SO<sub>4</sub> and volatiles removed by rotary evaporation. Crude materials were purified by PTLC or flash column chromatography on Biotage® isolera one instrument to give the corresponding products.

#### General Procedure 4: Coupling procedure for synthesis of amide with acid chloride

To a solution of corresponding amine (1.0 eq.) and triethylamine (1.1 eq.) in dichloromethane (0.1 M), and corresponding acid chloride (1.0 eq.) solution in dichloromethane was added over 10 minutes at 0°C, and resulting mixture was allowed to stir at room temperature until starting amines was fully consumed, as indicated by TLC. The crude reaction mixture was diluted with dichloromethane, washed with saturated aqueous NH<sub>4</sub>Cl solution followed by NaHCO<sub>3</sub> solution, the combined dichloromethane solution dried over anhydrous Na<sub>2</sub>SO<sub>4</sub>, and volatiles removed by rotary evaporation. The crude materials were purified by PTLC or flash column chromatography on Biotage® isolera one instrument to give the corresponding products.

#### General synthetic Scheme 3:

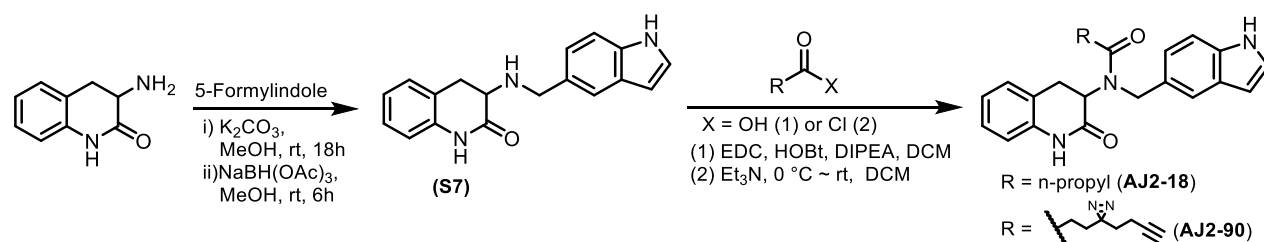

To a solution of 3-amino-3,4-dihydroquinolin-2(1H)-one (1.0 eq.) and corresponding 5-Formylindole (1.0 eq.) in dry methanol, potassium carbonate (3.0 eq.) was added, and the reaction mixture was stirred at room temperature for 18 h. The reaction mixture was filtered on Whatman® filter paper to remove the excess potassium carbonate washed with methanol and sodium triacetoxyborohydride (2.0 eq.) was added at 0°C to the filtered solution and resulting mixture was stirred for 6 h at room temperature. After completion (monitored by TLC) the solvent was removed by rotary evaporation, crude mixture was diluted with water and washed with saturated aqueous NaHCO<sub>3</sub> solution extracted in ethyl acetate, the combined extract was dried over Na<sub>2</sub>SO<sub>4</sub>, filtered and concentrated in vacuum, purified by flash column chromatography on Biotage® isolera one with 5-80 % ethyl acetate gradient in hexane to obtain corresponding 3-(((1H-indol-5-yl)methyl)amino)-3,4-dihydroquinolin-2(1H)-one (**S7**) as a white solid.

#### ii) Characterization data of FFF (Fully Functionalized Fragments) probes:

FFF-1, 2, 3, 6, 7, 10, 11, 14, 15, 37, 38 and FFF-ctrl are synthesized according to previously reported procedure.<sup>1,2</sup>

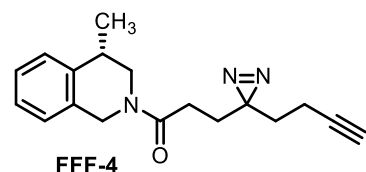

(S)-3-(3-(but-3-yn-1-yl)-3H-diazirin-3-yl)-1-(4-methyl-3,4-dihydroisoquinolin-2(1H)-yl)propan-1-one (FFF-4): Synthesized according to general procedure 2, the crude residue was

purified by biotage (Hexanes/EtOAc, 6:4) to afford FFF-4 as a colorless liquid (12 mg, 74%). <sup>1</sup>H NMR (400 MHz, CDCl<sub>3</sub>) δ 7.25 – 7.06 (m, 7H), 4.95 (d, *J* = 17.2 Hz, 1H), 4.52 – 4.57 (m, 2H), 3.74 – 3.68 (m, 1H), 3.62 – 3.56 (m, 1H), 3.48 – 3.42 (m, 1H), 3.10 – 2.93 (m, 2H), 2.21 – 2.11 (m, 3H) 2.02 – 2.07 (m, 3H) 1.91 (dd, *J* = 7.1, 1.8 Hz, 3H), 1.69 (t, *J* = 7.5 Hz, 3H), 1.30 (d, *J* = 7.0 Hz, 3H), 1.26 (d, *J* = 7.0 Hz, 2.55H). *Note: rotameric mixtures observed, LCMS calcd for C<sub>18</sub>H<sub>22</sub>N<sub>3</sub>O, 296.18 (M+H<sup>+</sup>), found: 296.2.*

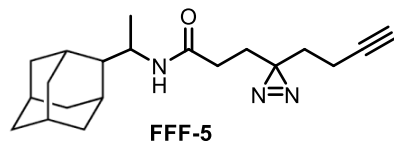

**N-(1-((3r,5r,7r)-adamantan-1-yl)ethyl)-3-(3-(but-3-yn-1-yl)-3H-diazirin-3-yl)propanamide (FFF-5):** Synthesized according to general procedure 1, purified by biotage (Hexanes/EtOAc, 8:2) to afford FFF-5 as a white solid (11 mg, 67%). <sup>1</sup>H NMR (400 MHz, CDCl<sub>3</sub>) δ 5.26 – 5.24 (m, 1H), 3.74 – 3.68 (m, 1H), 2.06 – 1.96 (m, 6H), 1.97 – 1.81 (m, 4H), 1.76 – 1.58 (m, 9H), 1.58 – 1.43 (m, 7H), 1.06 – 0.98 (m, 4H). <sup>13</sup>C NMR (151 MHz, CDCl<sub>3</sub>) δ 170.76, 83.08, 69.52, 53.41, 38.73, 37.37, 36.07, 32.82, 31.03, 28.82, 28.63, 28.27, 14.89, 13.67.

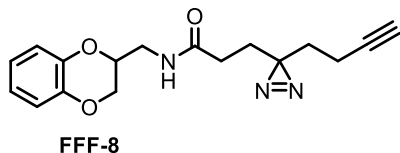

**3-(3-(but-3-yn-1-yl)-3H-diazirin-3-yl)-N-((2,3-dihydrobenzo[b][1,4]dioxin-2-yl)methyl)propanamide (FFF-8):** Synthesized according to general procedure 2, purified by biotage (Hexanes/EtOAc, 6:4) to afford FFF-8 as a white solid (16 mg, 74%). <sup>1</sup>H NMR (400 MHz, CDCl<sub>3</sub>) δ 6.88 – 6.82 (m, 4H), 5.91 (s, 1H), 4.33 – 4.17 (m, 2H), 3.98 – 3.92 (m, 1H), 3.71 – 3.65 (m, 1H), 3.47 (t, *J* = 6.1 Hz, 1H), 2.03 – 1.94 (m, 5H), 1.85 (t, *J* = 7.4 Hz, 2H), 1.63 (t, *J* = 7.4 Hz, 2H). <sup>13</sup>C NMR (151 MHz, CDCl<sub>3</sub>) δ 171.71, 143.06, 142.73, 121.68, 117.28, 117.21, 82.73, 71.91, 69.39, 65.68, 39.81, 32.33, 30.18, 28.25, 27.86, 13.26. LCMS *calcd for C<sub>17</sub>H<sub>20</sub>N<sub>3</sub>O<sub>3</sub>, 314.1 (M+H<sup>+</sup>), found: 314.1.*

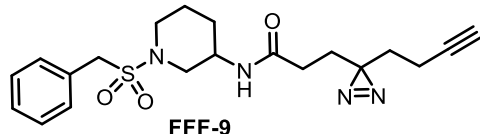

**N-(1-(benzylsulfonyl)piperidin-3-yl)-3-(3-(but-3-yn-1-yl)-3H-diazirin-3-yl)propanamide (FFF-9):** Synthesized according to general procedure 2, the crude residue was purified by biotage (Hexanes/EtOAc, 8:2) to afford FFF-9 as a colorless liquid (14 mg, 76%). <sup>1</sup>H NMR (400 MHz, CDCl<sub>3</sub>) δ 7.39 (q, *J* = 2.6 Hz, 5H), 5.81 (d, *J* = 7.7 Hz, 1H), 4.24 (s, 2H), 4.02 – 3.89 (m, 1H), 3.46 – 3.42 (m, 1H), 3.28 – 3.20 (m, 1H), 2.98 – 2.94 (m, 1H), 2.75 – 1.98 (m, 1H), 2.07 – 1.98 (m, 3H), 1.98 – 1.88 (m, 2H), 1.86 – 1.77 (m, 3H), 1.68 – 1.60 (m, 3H). LCMS *calcd for C<sub>20</sub>H<sub>27</sub>N<sub>4</sub>O<sub>3</sub>S, 403.18 (M+H<sup>+</sup>), found: 403.2.*

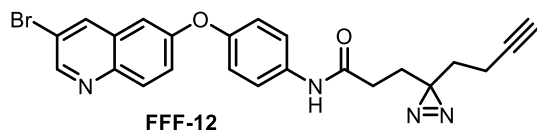

**N-(4-((3-bromoquinolin-6-yl)oxy)phenyl)-3-(3-(but-3-yn-1-yl)-3H-diazirin-3-yl)propanamide (FFF-12):** Synthesized according to general procedure 2, purified by biotage (Hexanes/EtOAc,



6:4) to afford FFF-12 as an off white solid (15 mg, 74%). <sup>1</sup>H NMR (600 MHz, CDCl<sub>3</sub>) δ 8.79 (d, *J* = 2.3 Hz, 1H), 8.14 (d, *J* = 2.3 Hz, 1H), 8.03 (d, *J* = 9.2 Hz, 1H), 7.58 – 7.52 (m, 2H), 7.47 (d, *J* = 2.7 Hz, 1H), 7.43 (s, 1H), 7.10 – 7.01 (m, 3H), 2.14 (dd, *J* = 8.2, 6.8 Hz, 2H), 2.08 – 2.02 (m, 2H), 2.00 (t, *J* = 2.6 Hz, 1H), 2.00 – 1.94 (m, 2H), 1.70 (t, *J* = 7.4 Hz, 2H). <sup>13</sup>C NMR (151 MHz, CDCl<sub>3</sub>) δ 169.46, 157.00, 152.28, 149.83, 143.05, 136.31, 134.22, 131.41, 130.11, 123.10, 121.93, 120.67, 117.97, 110.94, 82.72, 69.35, 32.48, 31.21, 28.20, 27.86, 13.33. LCMS *calcd* for C<sub>23</sub>H<sub>20</sub>BrN<sub>4</sub>O<sub>2</sub>, 463.1 (M+H<sup>+</sup>), *found*: 463.1.

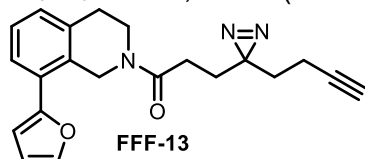

**3-(3-(but-3-yn-1-yl)-3H-diazirin-3-yl)-1-(8-(furan-2-yl)-3,4-dihydroisoquinolin-2(1H)-yl)propan-1-one (FFF-13):** Synthesized according to general procedure 1, purified by biotage (Hexanes/EtOAc, 5:5) to afford FFF-13 as a colorless liquid (15 mg, 65%). <sup>1</sup>H NMR (400 MHz, CDCl<sub>3</sub>) δ 7.37 (d, *J* = 1.9 Hz, 1H), 7.31 (s, 1.25 H), 7.27 – 7.16 (m, 7.68 H), 6.82 – 6.80 (m, 1.32 H), 6.27 – 6.24 (m, 2.27 H), 6.08 – 5.99 (m, 2.29 H), 5.98 (s, 1H), 4.60 – 4.55 (m, 1H), 3.81 – 3.76 (m, 1.33 H), 3.60 – 3.52 (m, 1.35 H), 3.06 – 2.85 (m, 5H), 2.80 – 2.75 (m, 1.12 H), 2.65 – 2.49 (m, 2.81 H), 2.36 – 2.28 (m, 1.06), 2.23 – 2.07 (m, 2.43 H), 2.09 – 2.00 (m, 3.47 H), 1.98 – 1.95 (m, 2.53 H), 1.94 – 1.86 (m, 4.31H), 1.70 – 1.65 (s, 3.74H). *Note: rotameric mixtures observed, LCMS calcd* for C<sub>21</sub>H<sub>22</sub>N<sub>3</sub>O<sub>2</sub>, 348.2 (M+H<sup>+</sup>), *found*: 348.2.

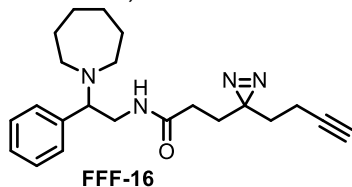

**N-(2-(azepan-1-yl)-2-phenylethyl)-3-(3-(but-3-yn-1-yl)-3H-diazirin-3-yl)propanamide (FFF-16):** Synthesized according to general procedure 1, purified by biotage (Hexanes/EtOAc, 3:7) to afford FFF-16 as a colorless liquid (7 mg, 64%). <sup>1</sup>H NMR (400 MHz, CDCl<sub>3</sub>) δ 7.38 – 7.28 (m, 3H), 7.23 (dd, *J* = 7.9, 1.7 Hz, 2H), 6.21 (s, 1H), 3.82 – 3.76 (m, 1H), 3.55 – 3.53 (m, 2H), 2.80 – 2.66 (m, 2H), 2.59 – 2.53 (m, 2H), 2.07 – 1.91 (m, 5H), 1.90 – 1.78 (m, 2H), 1.69 – 1.53 (m, 10H). LCMS *calcd* for C<sub>22</sub>H<sub>31</sub>N<sub>4</sub>O, 367.2 (M+H<sup>+</sup>), *found*: 367.2.

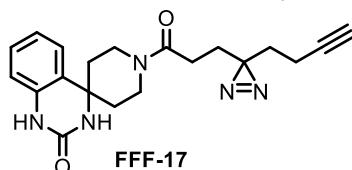

**N-(2-(3-(but-3-yn-1-yl)-3H-diazirin-3-yl)ethyl)-2'-oxo-2',3'-dihydro-1'H-spiro[piperidine-4,4'-quinazoline]-1-carboxamide (FFF-17):** Synthesized according to general procedure 2, purified by biotage (Hexanes/EtOAc, 8:2) to afford FFF-17 as an off white solid (12 mg, 67 %). <sup>1</sup>H NMR (400 MHz, CDCl<sub>3</sub>) δ 8.91 (s, 1H), 7.18 – 7.09 (m, 2H), 7.05 (d, *J* = 2.1 Hz, 1H), 6.98 (dd, *J* = 7.6, 1.2 Hz, 1H), 6.78 (dd, *J* = 7.9, 1.2 Hz, 1H), 4.68 – 4.54 (m, 1H), 3.75 – 3.61 (m, 1H), 3.53 – 3.46 (m, 1H), 3.02 – 2.98 (m, 1H), 2.12 – 1.93 (m, 7H), 1.93 – 1.79 (m, 4H), 1.72 – 1.62 (m, 2H). <sup>13</sup>C NMR (101 MHz, CDCl<sub>3</sub>) δ 169.53, 154.96, 135.65, 128.61, 125.12, 123.84, 122.87, 114.80, 82.82, 69.27, 55.00, 40.52, 38.13, 36.78, 32.55, 28.03, 27.96, 26.86, 13.34. LCMS *calcd* for C<sub>20</sub>H<sub>25</sub>N<sub>5</sub>O<sub>2</sub>, 366.2 (M+H<sup>+</sup>), *found*: 366.2.

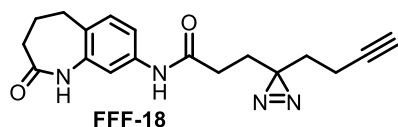

**3-(3-(but-3-yn-1-yl)-3H-diazirin-3-yl)-N-(2-oxo-2,3,4,5-tetrahydro-1H-benzo[b]azepin-8-yl)propanamide (FFF-18):** Synthesized according to general procedure 1, purified by biotage (Hexanes/EtOAc, 6:4) to afford FFF-18 as a white solid (9 mg, 64%). <sup>1</sup>H NMR (400 MHz, CDCl<sub>3</sub>) δ 8.27 (s, 1H), 8.00 (s, 1H), 7.33 – 7.23 (m, 2H), 7.13 (d, *J* = 8.1 Hz, 1H), 2.73 (t, *J* = 7.2 Hz, 2H), 2.33 (t, *J* = 7.3 Hz, 2H), 2.26 – 2.09 (m, 4H), 2.06 – 1.98 (m, 3H), 1.95 – 1.90 (m, 2H), 1.67 (t, *J* = 7.3 Hz, 2H). <sup>13</sup>C NMR (101 MHz, CDCl<sub>3</sub>) δ 175.59, 169.87, 138.14, 137.26, 130.21, 130.10, 117.02, 113.51, 82.74, 69.36, 32.89, 32.40, 31.20, 29.77, 28.50, 28.17, 27.92, 13.32. LCMS *calcd* for C<sub>18</sub>H<sub>21</sub>N<sub>4</sub>O<sub>2</sub>, 325.2 (M+H<sup>+</sup>), *found*: 325.2.

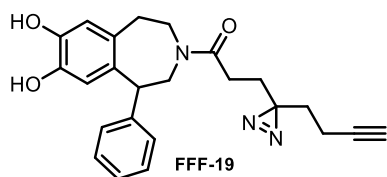

**3-(3-(but-3-yn-1-yl)-3H-diazirin-3-yl)-1-(7,8-dihydroxy-1-phenyl-1,2,4,5-tetrahydro-3H-benzo[d]azepin-3-yl)propan-1-one (FFF-19):** Synthesized according to general procedure 1, purified by biotage (Hexanes/EtOAc, 6:4) to afford FFF-19 as a white solid (8 mg, 65%). <sup>1</sup>H NMR (400 MHz, CDCl<sub>3</sub>) δ 7.39 – 7.16 (m, 5H), 7.13 – 7.03 (m, 1H), 6.99 – 6.85 (m, 2H), 6.72 (s, 1H), 6.39 (s, 1H), 4.48 – 4.43 (m, 1H), 4.37 – 4.32 (s, 1H), 4.03 – 3.88 (m, 1H), 3.70 – 3.61 (m, 1H), 3.59 – 3.49 (m, 2H), 3.38 – 3.19 (m, 2H), 2.84 – 2.67 (m, 1H), 1.96 – 1.81 (m, 7H), 1.62 – 1.52 (m, 2H), 1.52 – 1.36 (m, 4H). *Note: rotameric mixtures observed, LCMS calcd* for C<sub>24</sub>H<sub>27</sub>N<sub>3</sub>O<sub>3</sub>, 404.2 (M+H<sup>+</sup>), *found*: 404.2.

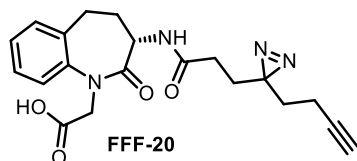

**(S)-2-(3-(3-(3-(but-3-yn-1-yl)-3H-diazirin-3-yl)propanamido)-2-oxo-2,3,4,5-tetrahydro-1H-benzo[b]azepin-1-yl)acetic acid (FFF-20):** Synthesized according to general procedure 1, purified by biotage (Hexanes/EtOAc, 8:2) to afford FFF-20 as a brown solid (11 mg, 64 %). <sup>1</sup>H NMR (400 MHz, CDCl<sub>3</sub>) δ 7.31 (dd, *J* = 7.8, 2.4 Hz, 1H), 7.26 – 7.19 (m, 2H), 7.14 (dd, *J* = 7.8, 1.3 Hz, 1H), 6.64 (d, *J* = 7.3 Hz, 1H), 4.68 – 4.62 (m, 1H), 4.58 – 4.51 (m, 1H), 4.52 – 4.44 (m, 1H), 3.31 – 3.19 (m, 1H), 2.73 – 2.56 (m, 2H), 2.10 (s, 1H), 2.03 – 1.89 (m, 5H), 1.82 – 1.68 (m, 2H), 1.66 – 1.53 (m, 2H). LCMS *calcd* for C<sub>20</sub>H<sub>23</sub>N<sub>4</sub>O<sub>4</sub>, 383.17 (M+H<sup>+</sup>), *found*: 383.2.

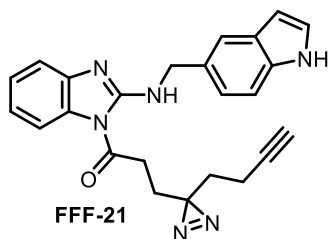

**1-(2-(((1H-indol-5-yl)methyl)amino)-1H-benzo[d]imidazol-1-yl)-3-(3-(but-3-yn-1-yl)-3H-diazirin-3-yl)propan-1-one (FFF-21):** Synthesized according to scheme 1, general procedure 1 and following general procedure 2, purified on Biotage® with hexane : ethyl acetate (6:4) to afford FFF-21 as colorless liquid (12 mg, 42 %) <sup>1</sup>H NMR (400 MHz, CDCl<sub>3</sub>) δ 8.36 (s, 1H), 8.09 – 8.04 (m, 1H), 7.67 (s, 1H), 7.45 (d, *J* = 7.8 Hz, 1H), 7.35 (d, *J* = 8.4 Hz, 1H), 7.30 – 7.20 (m, 4H), 7.06 (t, *J* = 7.8 Hz, 1H), 6.52 (s, 1H), 4.84 (d, *J* = 5.1 Hz, 2H), 2.76 (t, *J* = 7.4 Hz, 2H), 2.10 – 1.98 (m, 5H), 1.76 – 1.72 (m, 2H). <sup>13</sup>C NMR (151 MHz, CDCl<sub>3</sub>) δ 174.13, 149.86, 140.04, 135.33, 132.21, 128.20, 127.64, 124.96, 122.19, 122.11, 120.66, 118.41, 111.64, 110.60, 102.69, 82.67, 69.19, 50.27, 32.34, 29.72, 29.48, 27.57, 13.22. HRMS (ESI-TOF) calcd for C<sub>24</sub>H<sub>23</sub>N<sub>6</sub>O, 411.1928 (M+H<sup>+</sup>), found 411.1938.

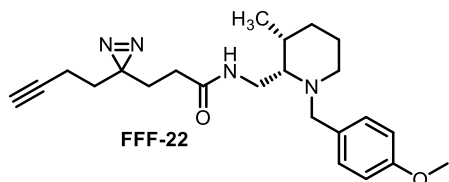

**3-(3-(but-3-yn-1-yl)-3H-diazirin-3-yl)-N-(((2S,3R)-1-(4-methoxybenzyl)-3-methylpiperidin-2-yl)methyl)propanamide (FFF-22):** Synthesized according to general procedure 2. The residue obtained was purified by biotage (Hexanes/EtOAc, 8:2) to afford FFF-22 as a colorless liquid (13 mg, 62%). <sup>1</sup>H NMR (400 MHz, CDCl<sub>3</sub>) δ 7.20 (d, *J* = 8.2 Hz, 2H), 6.92 – 6.86 (m, 2H), 6.24 – 6.11 (m, 1H), 3.82 (s, 3H), 3.76 (s, 2H), 3.43 – 3.31 (m, 1H), 3.14 – 3.09 (m, 1H), 2.79 – 2.69 (m, 1H), 2.67 – 2.50 (m, 2H), 2.12 – 2.06 (m, 1H), 2.06 – 1.97 (m, 3H), 1.92 – 1.72 (m, 5H), 1.68 – 1.56 (m, 3H), 1.37 – 1.27 (m, 2H), 0.86 – 0.79 (m, 3H). <sup>13</sup>C NMR (126 MHz, CDCl<sub>3</sub>) δ 170.96, 129.86, 113.91, 82.72, 69.19, 56.71, 55.30, 55.29, 45.11, 34.31, 32.36, 30.53, 29.70, 28.57, 27.90, 27.01, 20.49, 18.17, 13.31. HRMS (ESI-TOF) calcd for C<sub>23</sub>H<sub>33</sub>N<sub>4</sub>O<sub>2</sub>, 397.5425 (M+H<sup>+</sup>), found 397.2549.

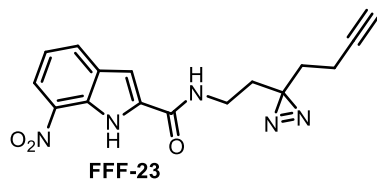

**N-(2-(3-(but-3-yn-1-yl)-3H-diazirin-3-yl)ethyl)-7-nitro-1H-indole-2-carboxamide (FFF-23):** Synthesized according to general procedure 2, purified by biotage (Hexanes/EtOAc, 6:4) to afford FFF-23 as a white solid (10 mg, 68%). <sup>1</sup>H NMR (400 MHz, CDCl<sub>3</sub>) δ 10.51 (s, 1H), 8.24 (dd, *J* = 8.1, 1.0 Hz, 1H), 8.01 (d, *J* = 7.8 Hz, 1H), 7.32 – 7.19 (m, 1H), 6.58 (t, *J* = 6.0 Hz, 1H), 3.39 (t, *J* = 6.4 Hz, 2H), 2.13 – 1.99 (m, 3H), 1.88 (t, *J* = 6.6 Hz, 3H), 1.71 (t, *J* = 7.0 Hz, 2H). <sup>13</sup>C NMR (101 MHz, CDCl<sub>3</sub>) δ 160.41, 133.44, 133.14, 131.24, 130.22, 129.29, 121.60, 120.11, 103.31, 82.80, 69.60, 34.76, 32.55, 32.09, 26.90, 13.20. LCMS calcd for C<sub>16</sub>H<sub>15</sub>N<sub>5</sub>O<sub>3</sub>, 326.1 (M+H<sup>+</sup>), found: 326.1.

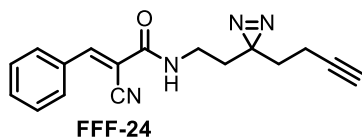

**(E)-N-(2-(3-(but-3-yn-1-yl)-3H-diazirin-3-yl)ethyl)-2-cyano-3-phenylacrylamide (FFF-24):** Synthesized according to general procedure 2, purified by biotage (Hexanes/EtOAc, 6:4) to afford FFF-24 as an off white solid (14 mg, 74 %). <sup>1</sup>H NMR (400 MHz, CDCl<sub>3</sub>) δ 8.33 (s, 1H), 7.99 –

7.86 (m, 2H), 7.59 – 7.44 (m, 3H), 6.51 (s, 1H), 3.34 – 3.30 (m, 2H), 2.10 – 1.99 (m, 3H), 1.81 (t,  $J = 6.9$  Hz, 2H), 1.74 – 1.64 (m, 2H).  $^{13}\text{C}$  NMR (101 MHz,  $\text{CDCl}_3$ )  $\delta$  160.34, 153.19, 132.90, 131.75, 130.70, 129.28, 116.91, 103.76, 82.55, 69.61, 35.50, 32.48, 32.14, 26.66, 13.25. LCMS *calcd* for  $\text{C}_{17}\text{H}_{17}\text{N}_4\text{O}$ , 293.2 ( $\text{M}+\text{H}^+$ ), *found*: 293.2.

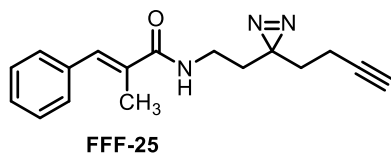

**(E)-N-(2-(3-(but-3-yn-1-yl)-3H-diazirin-3-yl)ethyl)-2-methyl-3-phenylacrylamide (FFF-25):** Synthesized according to general procedure 2, the crude residue was purified by biotage (Hexanes/EtOAc, 7:3) to afford FFF-25 as a colorless liquid (15 mg, 71%).  $^1\text{H}$  NMR (400 MHz,  $\text{CDCl}_3$ )  $\delta$  7.43 – 7.28 (m, 6H), 6.01 (s, 1H), 3.27 – 3.24 (m, 2H), 2.14 – 2.10 (m, 3H), 2.10 – 1.98 (m, 3H), 1.80 (t,  $J = 6.6$  Hz, 2H), 1.69 (t,  $J = 7.2$  Hz, 2H). LCMS *calcd* for  $\text{C}_{17}\text{H}_{19}\text{N}_3\text{O}$ , 281.16 ( $\text{M}+\text{H}^+$ ), *found*: 281.2.

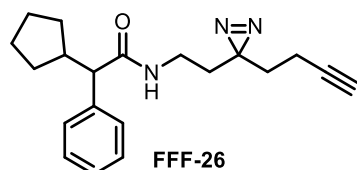

**N-(2-(3-(but-3-yn-1-yl)-3H-diazirin-3-yl)ethyl)-2-cyclopentyl-2-phenylacetamide (FFF-26):** Synthesized according to general procedure 2, the crude residue was purified by biotage (Hexanes/EtOAc, 9:1) to afford FFF-26 as a colorless liquid (13 mg, 68%).  $^1\text{H}$  NMR (600 MHz,  $\text{CDCl}_3$ )  $\delta$  7.39 – 7.34 (m, 2H), 7.34 – 7.30 (m, 2H), 7.28 – 7.23 (m, 1H), 5.65 (s, 1H), 3.13 – 3.03 (m, 2H), 3.02 – 3.00 (m, 1H), 2.63 – 2.59 (m, 1H), 2.03 – 1.95 (m, 2H), 1.93 – 1.89 (m, 2H), 1.70 – 1.58 (m, 5H), 1.56 – 1.51 (m, 2H), 1.49 – 1.42 (m, 1H), 1.28 (d,  $J = 8.5$  Hz, 2H), 1.07 – 0.95 (m, 1H).  $^{13}\text{C}$  NMR (151 MHz,  $\text{CDCl}_3$ )  $\delta$  173.49, 139.98, 128.59, 128.00, 127.12, 82.73, 69.35, 59.91, 43.17, 34.26, 32.43, 32.07, 31.74, 30.95, 26.77, 25.19, 24.84, 13.16. LCMS *calcd* for  $\text{C}_{20}\text{H}_{26}\text{N}_3\text{O}$ , 324.20 ( $\text{M}+\text{H}^+$ ), *found*: 324.2.

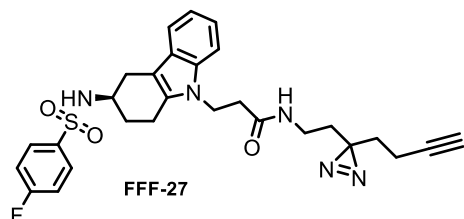

**(R)-N-((3-(but-3-yn-1-yl)-3H-diazirin-3-yl)methyl)-3-(3-((4-fluorophenyl)sulfonamido)-1,2,3,4-tetrahydro-9H-carbazol-9-yl)propanamide (FFF-27):** Synthesized according to general procedure 2, purified by biotage (Hexanes/EtOAc, 6:4) to afford FFF-27 as a colorless liquid (15 mg, 78%).  $^1\text{H}$  NMR (400 MHz,  $\text{CDCl}_3$ )  $\delta$  7.86 – 7.79 (m, 2H), 7.30 – 7.22 (m, 2H), 7.16 – 7.08 (m, 3H), 7.06 – 7.00 (m, 1H), 5.60 (t,  $J = 5.8$  Hz, 1H), 5.37 (d,  $J = 8.4$  Hz, 1H), 4.40 – 4.32 (m, 1H), 4.25 (t,  $J = 6.6$  Hz, 1H), 3.80 (d,  $J = 8.3$  Hz, 1H), 3.04 – 2.87 (m, 2H), 2.90 – 2.78 (m, 2H), 2.78 – 2.67 (m, 1H), 2.57 – 2.43 (m, 3H), 2.00 – 1.93 (m, 3H), 1.91 – 1.89 (m, 2H), 1.51 – 1.35 (m, 4H), LCMS *calcd* for  $\text{C}_{27}\text{H}_{29}\text{FN}_5\text{O}_3\text{S}$ , 521.2 ( $\text{M}+\text{H}^+$ ), *found*: 521.2.

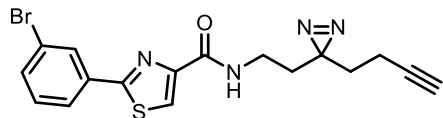

FFF-28

**2-(3-bromophenyl)-N-(2-(3-(but-3-yn-1-yl)-3H-diazirin-3-yl)ethyl)thiazole-4-carboxamide**

**(FFF-28):** Synthesized according to general procedure 2, purified by biotage (Hexanes/EtOAc, 7:3) to afford FFF-28 as an off white solid (12 mg, 71%). <sup>1</sup>H NMR (600 MHz, CDCl<sub>3</sub>) δ 8.13 (t, *J* = 1.8 Hz, 1H), 8.10 (s, 1H), 7.84 (dd, *J* = 7.8, 1.7, Hz, 1H), 7.57 (dd, *J* = 8.0, 2.0, Hz, 1H), 7.52 (d, *J* = 6.1 Hz, 1H), 7.32 (t, *J* = 7.9 Hz, 1H), 3.35 (t, *J* = 7.0 Hz, 2H), 2.04 (t, *J* = 7.4 Hz, 2H), 2.00 (t, *J* = 2.6 Hz, 1H), 1.82 (t, *J* = 7.0 Hz, 2H), 1.70 (t, *J* = 7.3 Hz, 2H). <sup>13</sup>C NMR (151 MHz, CDCl<sub>3</sub>) δ 166.34, 160.96, 150.75, 134.59, 133.50, 130.61, 129.41, 125.27, 123.55, 123.23, 82.63, 69.45, 34.32, 32.85, 26.86, 13.29. LCMS *calcd for* C<sub>17</sub>H<sub>16</sub>BrN<sub>4</sub>OS, 403.01 (M+H<sup>+</sup>), *found*: 403.1.

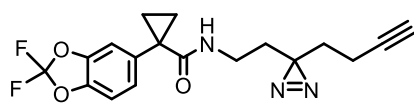

FFF-29

**N-(2-(3-(but-3-yn-1-yl)-3H-diazirin-3-yl)ethyl)-1-(2,2-difluorobenzo[d][1,3]dioxol-5-yl)cyclopropane-1-carboxamide**

**(FFF-29):** Synthesized according to general procedure 2, purified by biotage (Hexanes/EtOAc, 6:4) to afford FFF-29 as a white solid (15 mg, 78%). <sup>1</sup>H NMR (500 MHz, CDCl<sub>3</sub>) δ 7.23 – 7.16 (m, 2H), 7.09 (d, *J* = 8.1 Hz, 1H), 5.39 (d, *J* = 6.2 Hz, 1H), 3.08 (t, *J* = 6.4 Hz, 2H), 2.00 – 1.93 (m, 3H), 1.64 – 1.54 (m, 6H), 1.05 (q, *J* = 3.8 Hz, 2H). <sup>13</sup>C NMR (126 MHz, CDCl<sub>3</sub>) δ 173.24, 143.12, 143.51, 135.90, 133.80 (t, *J* = 256.0 Hz), 126.63, 112.50, 109.95, 82.65, 69.34, 35.26, 32.63, 32.13, 30.46, 26.84, 16.14, 16.12, 13.17. HRMS (ESI-TOF) *calcd for* C<sub>18</sub>H<sub>18</sub>F<sub>3</sub>N<sub>3</sub>O<sub>3</sub>, 362.1311 (M+H<sup>+</sup>), *found* 362.1312.

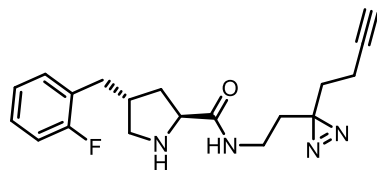

FFF-30

**(2S,4R)-N-(2-(3-(but-3-yn-1-yl)-3H-diazirin-3-yl)ethyl)-4-(2-fluorobenzyl)pyrrolidine-2-carboxamide**

**(FFF-30):** Synthesized according to general procedure 2, purified by biotage (Hexanes/EtOAc, 3:7) to afford FFF-30 as a colorless liquid (8 mg, 56%). <sup>1</sup>H NMR (600 MHz, CDCl<sub>3</sub>) δ 7.74 (s, 1H), 7.17 (d, *J* = 7.3 Hz, 2H), 7.05 (d, *J* = 7.3 Hz, 1H), 7.02 – 6.98 (m, 1H), 3.84 – 3.86 (m, 1H), 3.05 – 3.11 (m, 2H), 2.76 – 2.79 (m, 1H), 2.65 – 2.70 (m, 2H), 2.40 – 2.33 (m, 1H), 2.10 – 2.06 (m, 1H), 2.00 – 1.97 (m, 2H), 1.93 – 1.86 (m, 2H), 1.67 – 1.62 (m, 3H), 0.93 – 0.79 (m, 3H). LCMS *calcd for* C<sub>19</sub>H<sub>24</sub>FN<sub>4</sub>O<sub>3</sub>, 343.2 (M+H<sup>+</sup>), *found* 343.2.

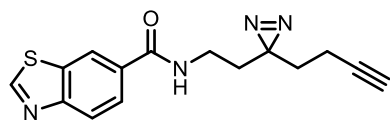

FFF-31

**N-(2-(3-(but-3-yn-1-yl)-3H-diazirin-3-yl)ethyl)benzo[d]thiazole-6-carboxamide (FFF-31):** Synthesized according to general procedure 2, purified by biotage (Hexanes/EtOAc, 6:4) to afford FFF-31 as a white solid (16 mg, 76%). <sup>1</sup>H NMR (400 MHz, CDCl<sub>3</sub>) δ 9.07 (s, 1H), 8.42 (dd, *J* = 1.8, 0.6 Hz, 1H), 8.09 (dd, *J* = 8.5, 0.6 Hz, 1H), 7.86 (dd, *J* = 8.5, 1.8 Hz, 1H), 6.75 (t, *J* = 5.9 Hz, 1H), 3.31 (td, *J* = 6.7, 5.8 Hz, 2H), 2.06 – 1.94 (m, 3H), 1.81 (t, *J* = 6.7 Hz, 2H), 1.65 (t, *J* = 7.1 Hz, 2H). <sup>13</sup>C NMR (101 MHz, CDCl<sub>3</sub>) δ 167.01, 156.67, 155.04, 134.12, 131.80, 124.69, 123.52, 121.69, 82.73, 69.54, 35.18, 32.42, 32.06, 26.98, 13.22. LCMS *calcd* for C<sub>15</sub>H<sub>15</sub>N<sub>4</sub>OS, 298.09 (M+H<sup>+</sup>), *found*: 298.1.

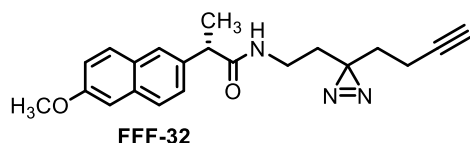

**(S)-N-(2-(3-(but-3-yn-1-yl)-3H-diazirin-3-yl)ethyl)-2-(6-methoxynaphthalen-2-yl)propanamide (FFF-32):** Synthesized according to general procedure 1. The residue obtained was purified by biotage (Hexanes/EtOAc, 7:3) to afford FFF-32 as a white solid (14 mg, 76%). <sup>1</sup>H NMR (400 MHz, CDCl<sub>3</sub>) δ 7.78 – 7.65 (m, 3H), 7.39 (dd, *J* = 8.5, 1.9 Hz, 1H), 7.21 – 7.09 (m, 2H), 5.46 (s, 1H), 3.92 (s, 3H), 3.70 (q, *J* = 7.2 Hz, 1H), 3.05 (t, *J* = 6.7 Hz, 2H), 1.93 – 1.80 (m, 3H), 1.61 (d, *J* = 7.2 Hz, 3H), 1.59 – 1.55 (m, 2H), 1.54 – 1.46 (m, 2H). LCMS *calcd* for C<sub>21</sub>H<sub>24</sub>N<sub>3</sub>O<sub>2</sub>, 350.2 (M+H<sup>+</sup>), *found*: 350.2.

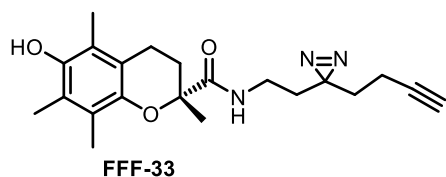

**(R)-N-(2-(3-(but-3-yn-1-yl)-3H-diazirin-3-yl)ethyl)-6-hydroxy-2,5,7,8-tetramethylchromane-2-carboxamide (FFF-33):** Synthesized according to general procedure 1. The residue obtained was purified by biotage (Hexanes/EtOAc, 6:4) to afford FFF-33 as a white solid (10 mg, 68%). <sup>1</sup>H NMR (400 MHz, CDCl<sub>3</sub>) δ 6.67 – 6.52 (m, 1H), 4.49 (d, *J* = 7.3 Hz, 1H), 3.11 – 3.07 (m, 2H), 2.71 – 2.49 (m, 2H), 2.42 – 2.36 (m, 1H), 2.24 (s, 3H), 2.18 (s, 3H), 2.10 (s, 3H), 1.95 (t, *J* = 2.6 Hz, 1H), 1.92 – 1.83 (m, 3H), 1.63 – 1.83 (m, 2H), 1.52 (s, 3H), 1.50 – 1.46 (m, 1H). LCMS *calcd* for C<sub>21</sub>H<sub>27</sub>N<sub>3</sub>O<sub>3</sub>, 370.2 (M+H<sup>+</sup>), *found*: 370.2.

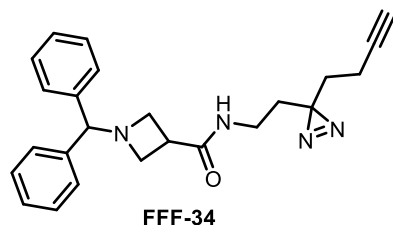

**1-benzhydryl-N-(2-(3-(but-3-yn-1-yl)-3H-diazirin-3-yl)ethyl)azetidine-3-carboxamide (FFF-34):** Synthesized according to general procedure 2, purified by biotage (Hexanes/EtOAc, 5:5) to afford FFF-34 as a colorless liquid (14 mg, 78%). <sup>1</sup>H NMR (400 MHz, CDCl<sub>3</sub>) δ 7.48 – 7.38 (m, 4H), 7.32 – 7.26 (m, 4H), 7.24 – 7.16 (m, 2H), 6.48 (s, 1H), 4.45 (s, 1H), 3.46 – 3.29 (m, 4H), 3.15 (t, *J* = 6.3 Hz, 2H), 3.07 (q, *J* = 6.5 Hz, 1H), 2.03 (t, *J* = 7.3 Hz, 2H), 1.98 (t, *J* = 2.6 Hz, 1H), 1.75 (t, *J* = 6.6 Hz, 2H), 1.66 (t, *J* = 7.3 Hz, 2H). <sup>13</sup>C NMR (101 MHz, CDCl<sub>3</sub>) δ 173.40, 141.51, 128.55,

127.47, 127.29, 82.65, 77.63, 77.28, 69.49, 56.41, 35.83, 34.18, 32.42, 32.27, 26.91, 13.25.  
LCMS *calcd* for C<sub>24</sub>H<sub>27</sub>N<sub>4</sub>O, 387.2 (M+H<sup>+</sup>), *found*: 387.2.

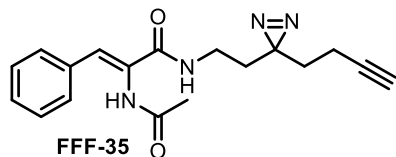

**(Z)-2-acetamido-N-(2-(3-(but-3-yn-1-yl)-3H-diazirin-3-yl)ethyl)-3-phenylacrylamide (FFF-35):** Synthesized according to general procedure 2, purified by biotage (Hexanes/EtOAc, 8:2) to afford FFF-35 as an off white solid (12 mg, 71 %). <sup>1</sup>H NMR (600 MHz, CD<sub>3</sub>OD\_SPE) δ 7.52 (dd, *J* = 7.7, 1.7 Hz, 2H), 7.45 – 7.38 (m, 2H), 7.38 – 7.32 (m, 1H), 7.14 (s, 1H), 3.22 (t, *J* = 7.3 Hz, 2H), 2.31 (d, *J* = 2.7, 0.9 Hz, 1H), 2.12 (d, *J* = 0.9 Hz, 3H), 2.07 (tdd, *J* = 7.4, 2.7, 0.9 Hz, 2H), 1.74 – 1.65 (m, 4H). <sup>13</sup>C NMR (151 MHz, CD<sub>3</sub>OD\_SPE) δ 171.94, 166.70, 133.86, 129.17, 129.14, 129.06, 128.70, 128.37, 82.32, 69.06, 48.09, 47.94, 47.80, 47.66, 47.52, 47.38, 47.24, 34.58, 32.07, 31.84, 26.56, 21.36. LCMS *calcd* for C<sub>18</sub>H<sub>21</sub>N<sub>4</sub>O<sub>2</sub>, 325.2 (M+H<sup>+</sup>), *found*: 325.2.

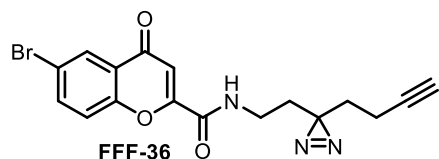

**6-bromo-N-(2-(3-(but-3-yn-1-yl)-3H-diazirin-3-yl)ethyl)-4-oxo-4H-chromene-2-carboxamide (FFF-36):** Synthesized according to general procedure 1. The residue obtained was purified by biotage (Hexanes/EtOAc, 7:3) to afford FFF-36 as a white solid (12 mg, 71%). <sup>1</sup>H NMR (400 MHz, CDCl<sub>3</sub>) δ 8.36 (d, *J* = 2.4 Hz, 1H), 7.84 (dd, *J* = 8.9, 2.5 Hz, 1H), 7.47 (d, *J* = 8.9 Hz, 1H), 7.17 (s, 1H), 6.99 (s, 1H), 3.37 (q, *J* = 6.5 Hz, 2H), 2.12 – 1.99 (m, 3H), 1.88 (t, *J* = 6.7 Hz, 2H), 1.71 (t, *J* = 7.1 Hz, 2H). LCMS *calcd* for C<sub>17</sub>H<sub>14</sub>BrN<sub>3</sub>O<sub>3</sub>, 388.02 (M+H<sup>+</sup>), *found*: 388.02.

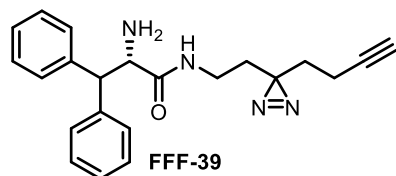

**(S)-2-amino-N-(2-(3-(but-3-yn-1-yl)-3H-diazirin-3-yl)ethyl)-3,3-diphenylpropanamide (FFF-39):** Synthesized according to general procedure 2, purified by biotage (Hexanes/EtOAc, 8:2) to afford FFF-39 as a white solid (8 mg, 58 %). <sup>1</sup>H NMR (400 MHz, CDCl<sub>3</sub>) δ 7.35 – 7.26 (m, 8H), 7.26 – 7.19 (m, 2H), 6.70 (s, 1H), 4.59 (d, *J* = 6.5 Hz, 1H), 4.08 (d, *J* = 6.5 Hz, 1H), 3.05 – 2.88 (m, 2H), 2.01 – 1.90 (m, 3H), 1.53 (t, *J* = 7.4 Hz, 2H), 1.42 (t, *J* = 6.9 Hz, 2H). LCMS *calcd* for C<sub>22</sub>H<sub>25</sub>N<sub>4</sub>O, 361.20 (M+H<sup>+</sup>), *found*: 361.2.

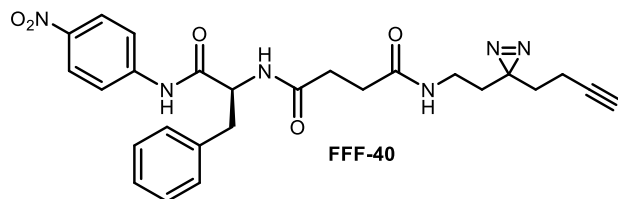

**(S)-N1-(2-(3-(but-3-yn-1-yl)-3H-diazirin-3-yl)ethyl)-N4-(1-((4-nitrophenyl)amino)-1-oxo-3-phenylpropan-2-yl)succinamide (FFF-40):** Synthesized according to general procedure 2, purified by biotage (Hexanes/EtOAc, 4:6) to afford FFF-40 as a white solid (8 mg, 65%). <sup>1</sup>H NMR (400 MHz, CDCl<sub>3</sub>) δ 9.22 (s, 1H), 8.24 – 8.14 (m, 2H), 7.97 – 7.88 (m, 2H), 7.37 – 7.28 (m, 3H), 7.27 – 7.22 (m, 3H), 6.20 – 6.16 (m, 1H), 5.74 – 5.68 (m, 1H), 4.94 – 4.88 (m, 1H), 3.38 – 3.18 (m, 2H), 3.08 – 2.96 (m, 2H), 2.91 – 2.76 (m, 1H), 2.42 – 2.37 (m, 2H), 2.05 – 1.94 (m, 3H), 1.71 – 1.67 (m, 2H), 1.63 – 1.55 (m, 3H). <sup>13</sup>C NMR (101 MHz, CDCl<sub>3</sub>) δ 172.89, 172.39, 170.31, 144.10, 143.46, 136.27, 129.19, 128.90, 127.27, 124.75, 119.77, 82.66, 69.65, 54.86, 36.96, 34.60, 32.27, 32.05, 31.49, 31.11, 26.72, 13.17. LCMS *calcd for* C<sub>26</sub>H<sub>29</sub>N<sub>6</sub>O<sub>5</sub>, 505.2 (M+H<sup>+</sup>), *found*: 505.2.

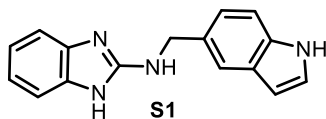

**N-((1H-indol-5-yl)methyl)-1H-benzodimidazol-2-amine:** Synthesized according to scheme 1 purified on Biotage<sup>®</sup> with 0 to 7 % methanol gradient in dichloromethane to afford S1 as a light brown solid (450 mg, 62 %). <sup>1</sup>H NMR (400 MHz, DMSO) δ 11.02 (s, 1H), 7.53 (d, *J* = 1.6 Hz, 1H), 7.34 (d, *J* = 8.3 Hz, 1H), 7.30 (t, *J* = 2.7 Hz, 1H), 7.15 – 7.09 (m, 3H), 7.05 (t, *J* = 6.1 Hz, 1H), 6.85 (dd, *J* = 5.8, 3.2 Hz, 2H), 6.37 (t, *J* = 2.6 Hz, 1H), 4.56 (d, *J* = 5.9 Hz, 2H). HRMS (ESI-TOF) *calcd for* C<sub>16</sub>H<sub>15</sub>N<sub>4</sub>, 263.1291 (M+H<sup>+</sup>), *found* 263.1287.

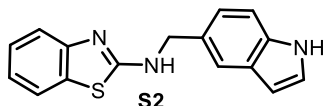

**N-((1H-indol-5-yl)methyl)benzo[d]thiazol-2-amine (S2):** To a solution of 2-Aminobenzothiazole (1.0 eq.) and 5-Formylindole (1.0 eq.) in dry ethanol, sodium triacetoxyborohydride (2.0 eq.) and acetic acid (2.0 eq.) was added at 0°C to the solution and resulting mixture was stirred for 14 h at room temperature. After completion (monitored by TLC) the solvent was removed by rotary evaporation, crude mixture was diluted with water and saturated aqueous NaHCO<sub>3</sub> solution, extracted in ethyl acetate, the combined extracts was dried over Na<sub>2</sub>SO<sub>4</sub>, filtered and concentrated in vacuum, purified by flash column chromatography on Biotage<sup>®</sup> isolera one with 5-70 % ethyl acetate gradient in hexane to obtain corresponding N-((1H-indol-5-yl)methyl)benzo[d]thiazol-2-amine (**S2**) as a light brown solid (12 mg, 22 %). <sup>1</sup>H NMR (400 MHz, CD<sub>3</sub>OD\_SPE) δ 7.58 – 7.53 (m, 2H), 7.43 (dd, *J* = 8.1, 1.2, Hz, 1H), 7.36 (dd, *J* = 8.3, 0.9 Hz, 1H), 7.27 – 7.19 (m, 2H), 7.14 (dd, *J* = 8.4, 1.7 Hz, 1H), 7.03 (td, *J* = 7.6, 1.2 Hz, 1H), 6.41 (d, *J* = 3.1, Hz, 1H), 4.66 (s, 2H). HRMS (ESI-TOF) *calcd for* C<sub>16</sub>H<sub>14</sub>N<sub>3</sub>S, 280.0903 (M+H<sup>+</sup>), *found* 280.0901.

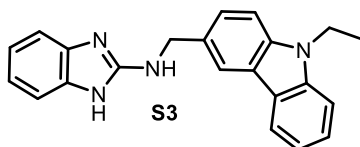

**N-((9-ethyl-9H-carbazol-3-yl)methyl)-1H-benzodimidazol-2-amine (S3):** Synthesized according to scheme 1 purified on Biotage<sup>®</sup> with 0 to 6 % methanol gradient in dichloromethane to afford S3 as a light yellow solid (210 mg, 72 %). <sup>1</sup>H NMR (400 MHz, DMSO) δ 11.00 (s, 1H), 8.15 (dd, *J* = 1.7, 0.7 Hz, 1H), 8.10 (dd, *J* = 7.8, 1.0 Hz, 1H), 7.62 – 7.55 (m, 2H), 7.51 (dd, *J* = 8.4, 1.7 Hz, 1H), 7.43 (dd, *J* = 8.3, 1.2 Hz, 1H), 7.27 (s, 1H), 7.21 – 7.11 (m, 3H), 6.92 – 6.86 (m,



2H), 4.67 (d,  $J = 5.4$  Hz, 2H), 4.42 (t,  $J = 7.1$  Hz, 2H), 1.28 (t,  $J = 7.1$  Hz, 3H). HRMS (ESI-TOF) calcd for  $C_{22}H_{21}N_4$ , 341.1761 ( $M+H^+$ ), found 341.1762.

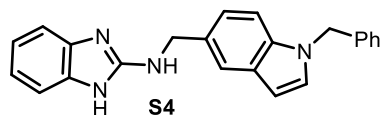

**N-((1-benzyl-1H-indol-5-yl)methyl)-1H-benzo[d]imidazol-2-amine (S4):** Synthesized according to scheme 1 purified on Biotage<sup>®</sup> with 0 to 6 % methanol gradient in dichloromethane to afford S4 as a light yellow solid (85 mg, 62 %).  $^1H$  NMR (600 MHz, DMSO)  $\delta$  7.58 (s, 1H), 7.48 – 7.46 (s, 1H), 7.39 (d,  $J = 8.4$  Hz, 1H), 7.30 – 7.24 (m, 2H), 7.24 – 7.18 (m, 2H), 7.18 – 7.14 (m, 5H), 6.92 – 6.86 (m, 2H), 6.46 (d,  $J = 3.2$  Hz, 1H), 5.40 (s, 2H), 4.59 (s, 2H).  $^{13}C$  NMR (151 MHz, DMSO)  $\delta$  155.74, 138.80, 135.49, 131.06, 129.91, 128.97, 128.72, 127.74, 127.35, 121.76, 119.77, 119.59, 112.05, 110.47, 101.37, 49.63, 46.68, 40.40, 40.22, 40.12, 39.94, 39.84, 39.71, 39.57. HRMS (ESI-TOF) calcd for  $C_{23}H_{21}N_4$ , 353.1761 ( $M+H^+$ ), found 353.1750.

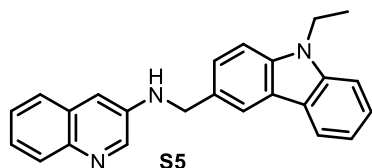

**N-((9-ethyl-9H-carbazol-3-yl)methyl)quinolin-3-amine (S5):** Synthesized according to scheme 1 purified on Biotage<sup>®</sup> with 0 to 6 % methanol gradient in dichloromethane to afford S5 as a brown solid (90 mg, 58 %).  $^1H$  NMR (400 MHz,  $CDCl_3$ )  $\delta$  8.54 (dd,  $J = 2.8, 1.0$  Hz, 1H), 8.20 – 8.08 (m, 2H), 8.04 – 7.98 (m, 1H), 7.62 (dd,  $J = 6.3, 3.3$  Hz, 1H), 7.52 (dd,  $J = 7.0, 1.4$  Hz, 2H), 7.48 – 7.42 (m, 4H), 7.27 (dd,  $J = 7.0, 1.8$  Hz, 1H), 7.14 (d,  $J = 2.7$  Hz, 1H), 4.59 (d,  $J = 3.6$  Hz, 2H), 4.47 (s, 1H), 4.43 – 4.33 (m, 2H), 1.46 (t,  $J = 7.2$  Hz, 3H).  $^{13}C$  NMR (101 MHz,  $CDCl_3$ )  $\delta$  143.46, 143.45, 142.18, 141.63, 140.34, 139.53, 129.57, 129.03, 128.48, 128.46, 126.91, 126.07, 125.92, 125.56, 124.92, 123.26, 122.65, 120.52, 119.76, 118.97, 110.38, 108.76, 108.62, 48.53, 37.64, 13.84. HRMS (ESI-TOF) calcd for  $C_{24}H_{22}N_3$ , 352.1804 ( $M+H^+$ ), found 352.1808.

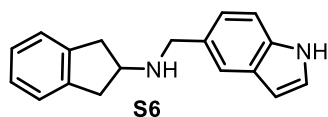

**N-((1H-indol-5-yl)methyl)-2,3-dihydro-1H-inden-2-amine (S6):** Synthesized according to scheme 1 general procedure 1 purified on Biotage<sup>®</sup> with 0 to 6 % methanol gradient in dichloromethane to afford S6 as a brown solid (90 mg, 58 %).  $^1H$  NMR (400 MHz,  $CDCl_3$ )  $\delta$  8.65 (s, 1H), 7.59 – 7.51 (m, 1H), 7.20 – 7.14 (m, 3H), 7.14 – 7.08 (m, 3H), 7.04 – 6.98 (m, 1H), 6.48 – 6.42 (m, 1H), 3.92 (s, 2H), 3.74 – 3.68 (m, 1H), 3.18 – 3.14 (m, 2H), 2.84 – 2.78 (m, 2H).  $^{13}C$  NMR (101 MHz,  $CDCl_3$ )  $\delta$  141.93, 135.21, 131.41, 128.10, 126.51, 124.84, 124.81, 122.73, 120.30, 111.28, 102.26, 58.85, 52.89, 40.11. HRMS (ESI-TOF) calcd for  $C_{18}H_{19}N_2$ , 263.1543 ( $M+H^+$ ), found 263.1535.

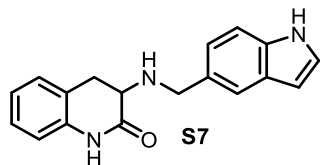

**3-(((1H-indol-5-yl)methyl)amino)-3,4-dihydroquinolin-2(1H)-one (S7):** Synthesized according to scheme 3, purified on Biotage<sup>®</sup> with 5 to 80 % ethyl acetate gradient in hexane to afford S7 as an off white solid (90 mg, 58 %). <sup>1</sup>H NMR (400 MHz, CD<sub>3</sub>OD\_SPE) δ 7.53 (d, *J* = 1.6 Hz, 1H), 7.35 (d, *J* = 8.3 Hz, 1H), 7.20 (d, *J* = 3.1 Hz, 1H), 7.13 (td, *J* = 7.8, 2.8 Hz, 3H), 6.94 (dd, *J* = 7.5, 1.2 Hz, 1H), 6.87 – 6.79 (m, 1H), 6.40 (dd, *J* = 3.2, 0.9 Hz, 1H), 4.01 (d, *J* = 12.6 Hz, 1H), 3.87 (d, *J* = 12.6 Hz, 1H), 3.40 (dd, *J* = 13.4, 6.2 Hz, 1H), 3.14 (dd, *J* = 15.3, 6.3 Hz, 1H), 2.84 – 2.78 (m, 1H). <sup>13</sup>C NMR (101 MHz, CD<sub>3</sub>OD\_SPE) δ 171.47, 136.80, 135.72, 129.02, 128.21, 128.00, 127.37, 124.72, 122.79, 122.53, 121.70, 119.90, 114.98, 110.98, 100.95, 54.50, 51.37, 30.95. HRMS (ESI-TOF) calcd for C<sub>18</sub>H<sub>19</sub>N<sub>3</sub>O, 292.1445 (M+H<sup>+</sup>), found 292.1446.

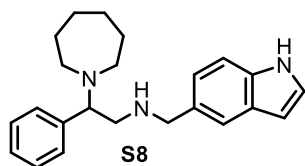

**N-((1H-indol-5-yl)methyl)-2-(azepan-1-yl)-2-phenylethan-1-amine (S8):** Synthesized according to scheme 3, and general procedure 2 purified on Biotage<sup>®</sup> with 0 to 6 % methanol gradient in dichloromethane to afford S8 as an off colorless liquid (90 mg, 58 %). <sup>1</sup>H NMR (400 MHz, CDCl<sub>3</sub>) δ 9.06 (s, 1H), 7.47 (d, *J* = 1.6 Hz, 1H), 7.24 – 7.14 (m, 4H), 7.09 – 7.01 (m, 4H), 6.40 (s, 1H), 4.59 (s, 1H), 3.97 – 3.94 (m, 1H), 3.90 – 3.76 (m, 2H), 3.10 – 3.04 (m, 1H), 2.82 – 2.78 (m, 1H), 2.57 – 2.51 (m, 2H), 2.42 – 2.28 (m, 2H), 2.00 – 1.96 (m, 1H), 1.53 – 1.44 (m, 2H), 1.40 (d, *J* = 2.9 Hz, 5H). LCMS calcd for C<sub>23</sub>H<sub>30</sub>N<sub>3</sub>, 348.2 (M+H<sup>+</sup>), found 348.2.

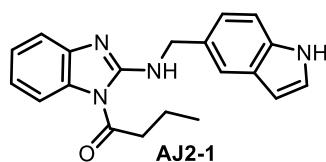

**1-(2-(((1H-indol-5-yl)methyl)amino)-1H-benzo[d]imidazol-1-yl)butan-1-one (AJ2-1):** Synthesized according to scheme 1 general procedure 1 and following general procedure 4, purified by Biotage<sup>®</sup> with hexane : ethyl acetate, (6:4) to afford AJ2-1 as an off white solid (17 mg, 62 %). <sup>1</sup>H NMR (400 MHz, CDCl<sub>3</sub>) δ 8.21 (s, 1H), 8.16 (s, 1H), 7.70 – 7.66 (m, 1H), 7.47 (dd, *J* = 7.8, 1.2 Hz, 1H), 7.38 (dd, *J* = 8.4, 1.7 Hz, 2H), 7.26 – 7.20 (m, 4H), 7.06 (dd, *J* = 7.5, 1.3 Hz, 1H), 6.53 – 6.55 (m, 1H), 4.85 (d, *J* = 5.2 Hz, 2H), 2.99 (t, *J* = 7.2 Hz, 2H), 1.84 (p, *J* = 7.3 Hz, 2H), 1.08 (t, *J* = 7.4 Hz, 3H). <sup>13</sup>C NMR (151 MHz, CDCl<sub>3</sub>) δ 174.57, 155.01, 143.89, 135.34, 130.14, 129.31, 128.08, 124.85, 124.74, 122.41, 120.21, 120.19, 117.13, 113.05, 111.33, 102.69, 47.60, 40.33, 17.27, 13.62. HRMS (ESI-TOF) calcd for C<sub>20</sub>H<sub>21</sub>N<sub>4</sub>O, 333.1710 (M+H<sup>+</sup>), found 333.1715.

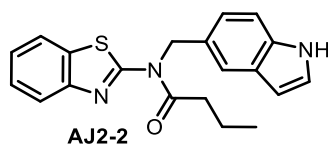

**N-((1H-indol-5-yl)methyl)-N-(benzo[d]thiazol-2-yl)butyramide (AJ2-2):** Synthesized according to scheme 1 general procedure 1 and following general procedure 2, purified by PTLC with hexane : ethyl acetate, (7:3) to afford AJ2-2 as brown solid (8 mg, 62 %) <sup>1</sup>H NMR (400 MHz, CDCl<sub>3</sub>) δ 8.17 (s, 1H), 7.84 (dd, *J* = 7.7, 1.1 Hz, 1H), 7.79 (dt, *J* = 8.2, 0.9 Hz, 1H), 7.48 – 7.45 (m, 1H), 7.40 (dd, *J* = 7.2, 1.3 Hz, 1H), 7.36 – 7.27 (m, 2H), 7.24 – 7.19 (m, 1H), 7.09 (dd, *J* = 8.5, 1.8 Hz, 1H), 6.48 (d, *J* = 2.0, 1H), 5.74 (s, 2H), 2.62 (t, *J* = 7.3 Hz, 2H), 1.72 (q, *J* = 7.4 Hz, 2H), 0.92 (t, *J* = 7.4 Hz, 3H). <sup>13</sup>C NMR (151 MHz, DMSO) δ 173.98, 159.69, 147.59, 135.12, 132.74, 127.74, 126.99, 126.05, 125.92, 123.78, 121.47, 120.90, 119.35, 117.03, 111.77, 100.99, 50.22, 35.73, 17.35, 13.43. HRMS (ESI-TOF) calcd for C<sub>20</sub>H<sub>20</sub>N<sub>3</sub>OS, 350.1322 (M+H<sup>+</sup>), found 350.1329.

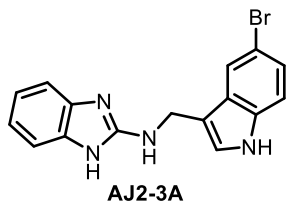

**N-((5-bromo-1H-indol-3-yl)methyl)-1H-benzo[d]imidazol-2-amine (AJ2-3A):** Synthesized according to scheme 1, general procedure 1 purified on Biotage<sup>®</sup> with dichloromethane : methanol (9:1) to afford AJ2-3A as light brown solid (160 mg, 64 %); <sup>1</sup>H NMR (400 MHz, CD<sub>3</sub>OD) δ 7.74 (s, 1H), 7.28 (s, 1H), 7.23 (dd, *J* = 8.6, 0.6 Hz, 1H), 7.20 – 7.12 (m, 3H), 6.94 (dd, *J* = 5.8, 3.2 Hz, 2H), 4.64 (d, *J* = 0.8 Hz, 2H). <sup>13</sup>C NMR (151 MHz, CD<sub>3</sub>OD\_SPE) δ 156.77, 136.92, 129.81, 126.02, 125.37, 122.27, 121.36, 114.00, 113.41, 113.19, 112.77, 39.38. HRMS (ESI-TOF) calcd for C<sub>16</sub>H<sub>14</sub>BrN<sub>4</sub>, 341.0397 (M+H<sup>+</sup>), found 341.0396.

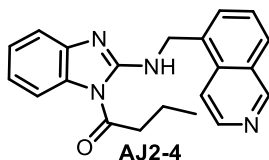

**1-(2-((isoquinolin-5-yl)methyl)amino)-1H-benzo[d]imidazol-1-yl)butan-1-one (AJ2-4):** Synthesized according to scheme 1, general procedure 1 and following general procedure 4, purified on Biotage<sup>®</sup> with Hexane : Ethyl acetate (6:4) to afford AJ2-4 as light brown solid (7 mg, 54 %) <sup>1</sup>H NMR (400 MHz, CD<sub>3</sub>OD) δ 9.17 (s, 1H), 8.40 (d, *J* = 7.1 Hz, 1H), 7.96 (d, *J* = 7.2, 1.6 Hz, 2H), 7.76 (dd, *J* = 7.2, 1.2 Hz, 1H), 7.62 – 7.54 (m, 1H), 7.48 (d, *J* = 8.2 Hz, 1H), 7.24 – 7.20 (m, 1H), 7.12 (dd, *J* = 7.7, 1.0 Hz, 1H), 7.07 – 6.99 (m, 1H), 5.09 (s, 2H), 3.00 (t, *J* = 7.1 Hz, 2H), 1.73 (q, *J* = 7.3 Hz, 2H), 0.98 (t, *J* = 7.4 Hz, 3H). <sup>13</sup>C NMR (151 MHz, CDCl<sub>3</sub>) δ 174.81, 154.76, 153.16, 143.67, 134.32, 132.84, 130.23, 130.17, 128.98, 128.01, 127.77, 127.35, 126.92, 125.05, 120.66, 117.37, 116.56, 113.17, 56.00, 44.15, 40.33, 17.21, 13.59. HRMS (ESI-TOF) calcd for C<sub>21</sub>H<sub>21</sub>N<sub>4</sub>O, 345.1710 (M+H<sup>+</sup>), found 345.1720.

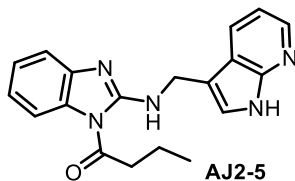

**1-(2-(((1H-pyrrolo[2,3-b]pyridin-3-yl)methyl)amino)-1H-benzo[d]imidazol-1-yl)butan-1-one (AJ2-5):** Synthesized according to scheme 1 general procedure 1 and following procedure 4,

purified on Biotage<sup>®</sup> with solvent Hexane : Ethyl acetate (6:4) to afford AJ2-5 as light brown solid to afford AJ2-5 as brown solid (12 mg, 62 %); <sup>1</sup>H NMR (400 MHz, CDCl<sub>3</sub>) δ 10.42 (s, 1H), 8.33 (d, *J* = 1.5 Hz, 1H), 8.12 – 8.07 (m, 1H), 8.05 (dd, *J* = 7.9, 1.5 Hz, 1H), 7.50 (dd, *J* = 8.0, 1.3 Hz, 1H), 7.44 – 7.38 (m, 2H), 7.30 – 7.24 (m, 2H), 7.13 – 7.05 (m, 2H), 4.93 (d, *J* = 5.1 Hz, 2H), 2.98 (t, *J* = 7.2 Hz, 2H), 1.83 (q, *J* = 7.3 Hz, 2H), 1.07 (t, *J* = 7.4 Hz, 3H). HRMS (ESI-TOF) calcd for C<sub>19</sub>H<sub>20</sub>N<sub>5</sub>O, 334.1663 (M+H<sup>+</sup>), found 334.1676.

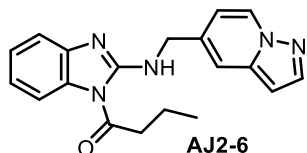

**1-(2-((pyrazolo[1,5-a]pyridin-5-ylmethyl)amino)-1H-benzo[d]imidazol-1-yl)butan-1-one**

**(AJ2-6):** Synthesized according to scheme 1 general procedure 1 and following general procedure 4, purified on Biotage<sup>®</sup> with hexane : ethyl acetate (6:4) to afford AJ2-6 as a brown solid (6 mg, 52 %) <sup>1</sup>H NMR (400 MHz, CDCl<sub>3</sub>) δ 8.45 (d, *J* = 7.2 Hz, 1H), 8.34 (s, 1H), 7.95 (d, *J* = 2.3 Hz, 1H), 7.55 (s, 1H), 7.44 – 7.39 (m, 2H), 7.30 – 7.24 (m, 2H), 7.16 – 7.06 (m, 1H), 6.82 (dd, *J* = 7.2, 2.0 Hz, 1H), 6.49 (d, *J* = 2.3 Hz, 1H), 4.83 (d, *J* = 5.9 Hz, 2H), 3.06 (t, *J* = 7.2 Hz, 2H), 1.92 (q, *J* = 7.3 Hz, 2H), 1.14 (t, *J* = 7.4 Hz, 3H). <sup>13</sup>C NMR (151 MHz, CDCl<sub>3</sub>) δ 174.89, 154.97, 143.45, 142.30, 139.95, 134.11, 130.18, 128.72, 125.02, 120.66, 117.39, 115.65, 113.14, 111.75, 96.82, 45.91, 40.36, 17.28, 13.62. HRMS (ESI-TOF) calcd for C<sub>19</sub>H<sub>20</sub>N<sub>5</sub>O, 334.1663 (M+H<sup>+</sup>), found 334.1676.

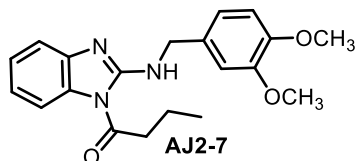

**1-(2-((3,4-dimethoxybenzyl)amino)-1H-benzo[d]imidazol-1-yl)butan-1-one** **(AJ2-7):**

Synthesized according to scheme 1, general procedure 1 and following general procedure 4, purified on Biotage<sup>®</sup> with hexane : ethyl acetate (6:4) to afford AJ2-7 as a brown solid (12 mg, 72 %) <sup>1</sup>H NMR (400 MHz, CDCl<sub>3</sub>) δ 8.16 – 8.13 (m, 1H), 7.45 (dd, *J* = 7.9, 1.3 Hz, 1H), 7.41 – 7.35 (m, 1H), 7.24 (dd, *J* = 7.7, 1.0 Hz, 1H), 7.06 (dd, *J* = 8.2, 1.3 Hz, 1H), 6.98 – 6.93 (m, 2H), 6.87 – 6.81 (m, 1H), 4.70 (d, *J* = 5.4 Hz, 2H), 3.88 (s, 3H), 3.87 (s, 3H), 2.99 (t, *J* = 7.2 Hz, 2H), 1.88 – 1.84 (m, 2H), 1.09 (t, *J* = 7.4 Hz, 3H). <sup>13</sup>C NMR (151 MHz, CDCl<sub>3</sub>) δ 174.68, 154.95, 149.13, 148.54, 143.67, 130.58, 130.10, 124.92, 120.36, 120.16, 117.15, 113.08, 111.31, 111.25, 55.96, 55.91, 46.79, 40.33, 17.26, 13.62. HRMS (ESI-TOF) calcd for C<sub>20</sub>H<sub>24</sub>N<sub>3</sub>O<sub>3</sub>, 354.1812 (M+H<sup>+</sup>), found 354.1822.

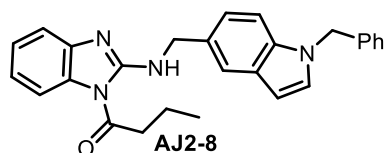

**1-(2-(((1-benzyl-1H-indol-5-yl)methyl)amino)-1H-benzo[d]imidazol-1-yl)butan-1-one** **(AJ2-8):**

Synthesized according to scheme 1, general procedure 1 and following general procedure 4, purified on Biotage<sup>®</sup> with hexane : ethyl acetate (6:4) to afford AJ2-8 as an off white solid (14 mg, 74 %) <sup>1</sup>H NMR (400 MHz, CDCl<sub>3</sub>) δ 8.13 (s, 1H), 7.71 – 7.65 (m, 1H), 7.46 (dd, *J* = 7.9, 1.2 Hz,

1H), 7.38 (d,  $J = 8.1$  Hz, 1H), 7.33 – 7.27 (m, 3H), 7.25 – 7.23 (m, 2H), 7.17 – 7.14 (m, 1H), 7.13 – 7.09 (m, 1H), 7.09 – 7.02 (m, 2H), 6.56 – 6.51 (m, 1H), 5.32 (s, 2H), 4.84 (d,  $J = 5.1$  Hz, 2H), 2.98 (t,  $J = 7.2$  Hz, 2H), 1.87 – 1.84 (m, 2H), 1.08 (t,  $J = 7.4$  Hz, 3H).  $^{13}\text{C}$  NMR (151 MHz,  $\text{CDCl}_3$ )  $\delta$  174.56, 154.98, 143.89, 137.46, 135.88, 130.13, 128.83, 128.80, 127.64, 126.77, 126.72, 124.85, 122.15, 121.45, 120.51, 120.18, 119.89, 117.14, 113.03, 110.38, 110.03, 101.74, 50.22, 47.59, 40.33, 17.26, 13.62. HRMS (ESI-TOF) calcd for  $\text{C}_{27}\text{H}_{27}\text{N}_4\text{O}$ , 423.2180 ( $\text{M}+\text{H}^+$ ), found 423.2176.

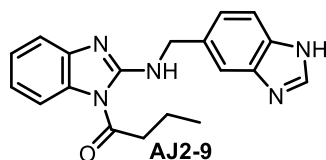

**1-(2-(((1H-benzo[d]imidazol-5-yl)methyl)amino)-1H-benzo[d]imidazol-1-yl)butan-1-one (AJ2-9):** Synthesized according to scheme 1, general procedure 1 and following general procedure 4, purified by PTLC with dichloromethane : methanol (9.5:0.5) to afford AJ2-9 as off white solid (6 mg, 48 %)  $^1\text{H}$  NMR (400 MHz, MeOD)  $\delta$  8.05 (s, 1H), 7.57 (d,  $J = 1.5$  Hz, 1H), 7.50 (d,  $J = 8.3$  Hz, 1H), 7.24 (dd,  $J = 8.3, 1.7$  Hz, 1H), 7.15 – 7.12 (m, 3H), 6.96 – 6.89 (m, 2H), 4.62 (s, 2H), 2.12 (t,  $J = 7.4$  Hz, 2H), 1.56 – 1.47 (m, 2H), 0.84 (t,  $J = 7.4$  Hz, 3H).  $^{13}\text{C}$  NMR (151 MHz, MeOD)  $\delta$  178.06, 154.19, 141.60, 135.66, 133.20, 122.19, 120.83, 120.72, 114.94, 111.28, 37.01, 29.36, 18.59, 12.75. HRMS (ESI-TOF) calcd for  $\text{C}_{19}\text{H}_{20}\text{N}_5\text{O}$ , 334.1663 ( $\text{M}+\text{H}^+$ ), found 334.1674.

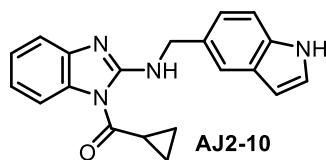

**(2-(((1H-indol-5-yl)methyl)amino)-1H-benzo[d]imidazol-1-yl)(cyclopropyl)methanone (AJ2-10):** Synthesized according to scheme 1, general procedure 1 and following general procedure 4, purified by PTLC with hexane : ethyl acetate (6:4) to afford AJ2-10 as off white solid (11 mg, 54 %)  $^1\text{H}$  NMR (400 MHz,  $\text{CDCl}_3$ )  $\delta$  8.30 (s, 1H), 7.68 (t,  $J = 5.2$  Hz, 1H), 7.58 (s, 1H), 7.51 (d,  $J = 8.1$  Hz, 1H), 7.40 (d,  $J = 7.9$  Hz, 1H), 7.26 (d,  $J = 8.4$  Hz, 1H), 7.17 – 7.13 (m, 4H), 6.98 (t,  $J = 7.8$  Hz, 1H), 6.44 (d,  $J = 3.2$  Hz, 1H), 4.75 (d,  $J = 4.6$  Hz, 2H), 2.41 (d,  $J = 4.6$  Hz, 1H), 1.32 – 1.24 (m, 2H), 1.15 – 1.11 (m, 2H).  $^{13}\text{C}$  NMR (151 MHz,  $\text{CDCl}_3$ )  $\delta$  174.96, 154.41, 143.92, 135.36, 130.69, 129.28, 129.26, 128.07, 124.78, 124.73, 124.61, 122.32, 120.14, 117.07, 112.78, 111.36, 111.31, 102.62, 102.56, 47.56, 16.72, 10.26. HRMS (ESI-TOF) calcd for  $\text{C}_{20}\text{H}_{19}\text{N}_4\text{O}$ , 331.1554 ( $\text{M}+\text{H}^+$ ), found 331.1554.

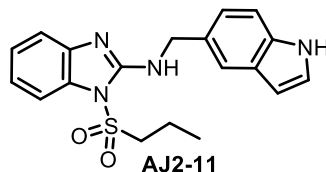

**N-((1H-indol-5-yl)methyl)-1-(propylsulfonyl)-1H-benzo[d]imidazol-2-amine (AJ2-11):** Synthesized according to scheme 1, general procedure 1 and following general procedure 4 with 1-Propanesulfonyl chloride, purified by PTLC (Hexane/Ethyl acetate 7:3) to afford AJ2-11 as an off white solid (5 mg, 43 %)  $^1\text{H}$  NMR (400 MHz, DMSO)  $\delta$  11.05 (s, 1H), 7.56 (d,  $J = 1.6$  Hz, 1H),

7.54 – 7.48 (m, 1H), 7.36 (d,  $J = 8.3$  Hz, 1H), 7.34 – 7.28 (m, 2H), 7.22 – 7.14 (m, 2H), 7.09 (t,  $J = 5.9$  Hz, 1H), 7.05 (td,  $J = 7.7, 1.2$  Hz, 1H), 6.42 – 6.38 (m, 1H), 4.69 (d,  $J = 5.8$  Hz, 2H), 3.65 – 3.56 (m, 2H), 1.60 – 1.48 (m, 2H), 0.82 (t,  $J = 7.4$  Hz, 3H).  $^{13}\text{C}$  NMR (151 MHz, DMSO)  $\delta$  152.60, 142.79, 135.63, 131.68, 129.76, 128.01, 126.12, 124.89, 121.49, 121.13, 119.41, 116.76, 112.22, 111.76, 101.42, 54.76, 47.20, 16.88, 12.49. HRMS (ESI-TOF) calcd for  $\text{C}_{19}\text{H}_{21}\text{N}_4\text{O}_2\text{S}$ , 369.1380 ( $\text{M}+\text{H}^+$ ), found 369.1381.

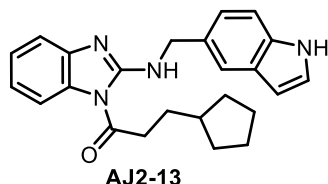

**1-(2-(((1H-indol-5-yl)methyl)amino)-1H-benzo[d]imidazol-1-yl)-3-cyclopentylpropan-1-one**

**(AJ2-13):** Synthesized according to scheme 1, general procedure 1 and following general procedure 4, purified by PTLC with hexane : ethyl acetate (7:3) to afford AJ2-13 as off white solid (8 mg, 47 %)  $^1\text{H}$  NMR (400 MHz,  $\text{CDCl}_3$ )  $\delta$  8.20 (s, 1H), 8.17 – 8.14 (m, 1H), 7.69 – 7.66 (m, 1H), 7.47 (dd,  $J = 8.0, 1.2$  Hz, 1H), 7.42 – 7.35 (m, 2H), 7.25 – 7.17 (m, 4H), 7.10 – 7.04 (m, 2H), 6.54 (d,  $J = 2.0$  Hz, 1H), 4.84 (d,  $J = 5.1$  Hz, 2H), 3.08 – 2.97 (m, 2H), 2.37 (s, 2H), 1.85 – 1.77 (m, 4H), 1.69 – 1.63 (m, 5H).  $^{13}\text{C}$  NMR (151 MHz,  $\text{CDCl}_3$ )  $\delta$  155.39, 135.65, 134.62, 127.96, 127.89, 120.49, 120.05, 116.70, 109.02, 108.80, 65.90, 48.02, 37.63, 36.04, 34.97, 30.05, 28.04, 19.58, 15.51, 15.30. HRMS (ESI-TOF) calcd for  $\text{C}_{24}\text{H}_{27}\text{N}_4\text{O}$ , 387.2180 ( $\text{M}+\text{H}^+$ ), found 387.2186.

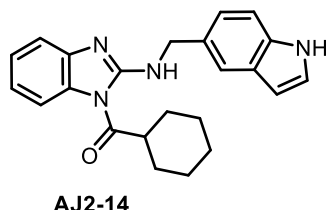

**(2-(((1H-indol-5-yl)methyl)amino)-1H-benzo[d]imidazol-1-yl)(cyclohexyl)methanone**

**(AJ2-14):** Synthesized according to scheme 1, general procedure 1 and following general procedure 4, purified by PTLC with hexane : ethyl acetate (6:4) to afford AJ2-14 as off white solid (6 mg, 47 %)  $^1\text{H}$  NMR (400 MHz,  $\text{CDCl}_3$ )  $\delta$  8.32 (s, 1H), 8.17 – 8.14 (m, 1H), 7.58 (d,  $J = 1.6$  Hz, 1H), 7.38 (dd,  $J = 7.9, 1.2$  Hz, 1H), 7.27 (d,  $J = 8.3$  Hz, 1H), 7.22 – 7.13 (m, 4H), 7.04 – 6.96 (m, 2H), 6.49 – 6.42 (m, 1H), 4.74 (d,  $J = 5.1$  Hz, 2H), 3.12 – 3.07 (m, 1H), 2.02 – 1.93 (m, 2H), 1.87 – 1.81 (m, 2H), 1.75 – 1.65 (m, 2H), 1.57 – 1.50 (m, 2H), 1.39 – 1.34 (m, 2H).  $^{13}\text{C}$  NMR (151 MHz,  $\text{CDCl}_3$ )  $\delta$  178.08, 155.28, 143.83, 135.37, 129.83, 129.18, 128.08, 124.87, 124.78, 122.35, 120.39, 120.17, 117.12, 112.82, 111.36, 102.62, 47.67, 44.79, 29.04, 28.73, 25.63, 25.47, 25.42. HRMS (ESI-TOF) calcd for  $\text{C}_{23}\text{H}_{25}\text{N}_4\text{O}$ , 373.2023 ( $\text{M}+\text{H}^+$ ), found 373.2035.

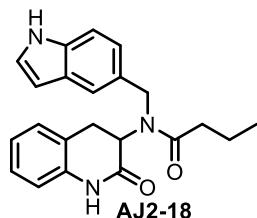

**N-((1H-indol-5-yl)methyl)-N-(2-oxo-1,2,3,4-tetrahydroquinolin-3-yl)butyramide (AJ2-18):**

Synthesized according to scheme 2 and general procedure 4, purified on Biotage<sup>®</sup> with hexane : ethyl acetate (5:5) to afford AJ2-18 as off white solid (14 mg, 62 %); <sup>1</sup>H NMR (400 MHz, CDCl<sub>3</sub>) δ 8.46 (s, 1H), 8.31 (s, 1H), 7.48 (d, *J* = 1.6 Hz, 1H), 7.32 (d, *J* = 8.3 Hz, 1H), 7.19 – 7.13 (m, 1H), 7.02 (dd, *J* = 8.3, 1.7 Hz, 2H), 6.87 (d, *J* = 7.6 Hz, 1H), 6.82 – 6.76 (m, 1H), 6.62 (dd, *J* = 7.9, 1.1 Hz, 1H), 6.49 – 6.42 (m, 1H), 5.00 – 4.85 (m, 1H), 4.77 (d, *J* = 17.1 Hz, 1H), 4.63 (d, *J* = 17.0 Hz, 1H), 3.34 (t, *J* = 14.8 Hz, 1H), 2.69 (dd, *J* = 15.3, 6.7 Hz, 1H), 2.51 – 2.32 (m, 2H), 1.71 – 1.67 (m, 2H), 0.88 (t, *J* = 7.4 Hz, 3H). <sup>13</sup>C NMR (101 MHz, CDCl<sub>3</sub>) δ 174.69, 169.14, 136.32, 135.33, 128.58, 128.32, 128.13, 127.62, 125.12, 122.95, 122.50, 120.65, 118.54, 115.14, 111.61, 102.50, 55.30, 51.88, 35.64, 30.32, 18.75, 13.90. HRMS (ESI-TOF) calcd for C<sub>22</sub>H<sub>23</sub>N<sub>3</sub>NaO<sub>2</sub>, 384.1682 (M+Na<sup>+</sup>), found 384.1697.

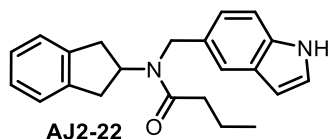**N-((1H-indol-5-yl)methyl)-N-(2,3-dihydro-1H-inden-2-yl)butyramide (AJ2-22):**

Synthesized according to scheme 1, general procedure 1 and following and general procedure 4, purified on Biotage<sup>®</sup> with hexane : ethyl acetate (6:4) to afford AJ2-22 as brown viscous liquid (17 mg, 68 %); <sup>1</sup>H NMR (400 MHz, CDCl<sub>3</sub>) δ 8.79 (s, 1H), 8.55 (s, 0.39 H), 7.41 (d, *J* = 1.8 Hz, 1H), 7.39 – 7.32 (m, 1.61 H), 7.26 (d, *J* = 8.4 Hz, 0.5 H), 7.22 – 7.17 (m, 1.12 H), 7.17 – 7.12 (m, 1.93 H), 7.00 (d, *J* = 8.4 Hz, 0.45 H), 6.95 – 6.93 (dd, *J* = 8.4, 1.9 Hz, 1.19 H), 6.50 (t, *J* = 2.7 Hz, 1.10 H), 6.45 (s, 0.42 H), 5.58 – 5.50 (m, 1.14 H), 4.90 (t, *J* = 8.2 Hz, 0.43 H), 4.74 (s, 0.89 H), 4.64 (s, 2.20 H), 3.17 – 2.93 (m, 6.63 H), 2.57 (t, *J* = 7.6 Hz, 0.93 H), 2.32 (t, *J* = 7.5 Hz, 2.28 H), 1.83 (q, *J* = 7.5 Hz, 1.01H), 1.74 – 1.65 (m, 2.49 H), 1.04 (t, *J* = 7.4 Hz, 1.43 H), 0.89 (t, *J* = 7.4 Hz, 3.53H). <sup>13</sup>C NMR (151 MHz, DMSO) δ 173.33, 172.89, 141.56, 141.13, 135.53, 135.29, 130.38, 129.33, 128.30, 128.07, 126.93, 126.75, 126.22, 125.83, 124.78, 124.75, 120.51, 119.71, 117.97, 117.38, 112.08, 111.54, 101.47, 101.30, 58.09, 56.00, 55.38, 48.80, 45.07, 36.88, 36.15, 35.58, 35.31, 19.11, 18.68, 14.37, 14.20. Note: rotameric isomers observed. HRMS (ESI-TOF) calcd for C<sub>22</sub>H<sub>25</sub>N<sub>2</sub>O, 333.1962 (M+H<sup>+</sup>), found 333.1960.

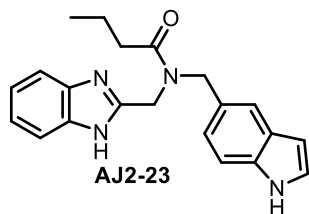**N-((1H-benzo[d]imidazol-2-yl)methyl)-N-((1H-indol-5-yl)methyl)butyramide (AJ2-23):**

Synthesized according to scheme 1, general procedure 1 and following general procedure 4, purified by PTLC with hexane : ethyl acetate (6:4) to afford AJ2-23 as viscous liquid (13 mg, 57 %); <sup>1</sup>H NMR (400 MHz, CDCl<sub>3</sub>) δ 10.50 (s, 1H), 9.17 (s, 1H), 7.79 – 7.69 (m, 1H), 7.47 – 7.39 (m, 2H), 7.28 – 7.23 (m, 4H), 6.89 (dd, *J* = 8.3, 1.7 Hz, 1H), 6.53 – 6.47 (m, 1H), 4.70 (s, 2H), 4.69 (s, 2H), 2.48 (t, *J* = 7.5 Hz, 2H), 1.74 – 1.73 (m, 2H), 0.96 (t, *J* = 7.4 Hz, 3H). <sup>13</sup>C NMR (151 MHz, CDCl<sub>3</sub>) δ 175.42, 151.21, 135.50, 128.25, 126.69, 125.16, 120.85, 118.71, 111.72, 102.48, 52.27, 44.34, 35.10, 18.73, 13.95. HRMS (ESI-TOF) calcd for C<sub>21</sub>H<sub>23</sub>N<sub>4</sub>O, 347.1867 (M+H<sup>+</sup>), found 347.1853.

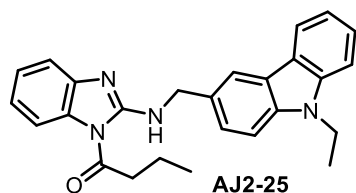

**1-(2-(((9-ethyl-9H-carbazol-3-yl)methyl)amino)-1H-benzo[d]imidazol-1-yl)butan-1-one (AJ2-25):** Synthesized according to scheme 1, general procedure 1 and following general procedure 4, purified on Biotage<sup>®</sup> with hexane : ethyl acetate (6:4) to afford AJ2-25 as a yellow solid (16 mg, 68 %); <sup>1</sup>H NMR (400 MHz, CDCl<sub>3</sub>) δ 8.21 (s, 1H), 8.14 (s, 1H), 8.09 (d, *J* = 7.8 Hz, 1H), 7.54 (dd, *J* = 8.4, 1.5 Hz, 1H), 7.51 – 7.44 (m, 2H), 7.44 – 7.37 (m, 3H), 7.26 – 7.19 (m, 2H), 7.11 – 7.03 (m, 1H), 4.94 (d, *J* = 5.2 Hz, 2H), 4.38 (q, *J* = 7.2 Hz, 2H), 3.00 (t, *J* = 7.2 Hz, 2H), 1.87 – 1.84 (m, 2H), 1.49 – 1.37 (m, 3H), 1.14 – 1.04 (m, 3H). <sup>13</sup>C NMR (151 MHz, CDCl<sub>3</sub>) δ 174.62, 155.00, 143.88, 140.29, 139.51, 130.16, 128.35, 125.96, 125.75, 124.88, 123.13, 122.74, 120.55, 120.24, 120.18, 118.84, 117.19, 113.06, 108.68, 108.51, 47.49, 40.35, 37.62, 17.26, 13.82, 13.62. HRMS (ESI-TOF) calcd for C<sub>26</sub>H<sub>27</sub>N<sub>4</sub>O, 411.2180 (M+H<sup>+</sup>), found 411.2180.

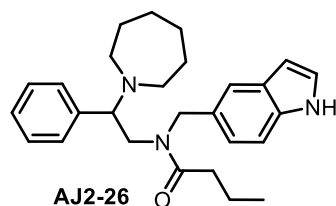

**N-((1H-indol-5-yl)methyl)-N-(2-(azepan-1-yl)-2-phenylethyl)butyramide (AJ2-26):** Synthesized according to scheme 1, general procedure 1 and following general procedure 4, purified PTLC with Hexane : Ethyl acetate (7:3) to afford AJ2-26 as a colorless liquid (9 mg, 56 %); <sup>1</sup>H NMR (400 MHz, CD<sub>2</sub>Cl<sub>2</sub>) δ 8.97 (s, 1H), 7.67 – 7.48 (m, 2H), 7.42 – 7.31 (m, 2H), 7.25 (d, *J* = 8.3 Hz, 2H), 7.16 – 7.12 (m, 2H), 6.69 (dd, *J* = 8.4, 1.7 Hz, 1H), 6.36 (d, *J* = 2.4 Hz, 1H), 4.41 – 4.29 (m, 2H), 3.62 – 3.51 (m, 2H), 3.05 (s, 2H), 2.29 – 2.09 (m, 3H), 1.79 – 1.69 (m, 3H), 1.53 – 1.48 (m, 9H), 0.80 (d, *J* = 7.4 Hz, 3H). <sup>13</sup>C NMR (151 MHz, CDCl<sub>3</sub>) δ 173.89, 173.54, 135.13, 128.88, 128.57, 128.27, 128.10, 125.69, 125.44, 124.86, 124.48, 122.66, 120.59, 120.31, 118.27, 111.38, 111.11, 102.56, 68.89, 66.49, 52.69, 52.56, 52.02, 48.67, 35.53, 35.00, 29.72, 26.92, 26.84, 19.00, 18.86, 14.07, 14.03. *Note: rotameric isomers observed*, HRMS (ESI-TOF) calcd for C<sub>27</sub>H<sub>36</sub>N<sub>3</sub>O, 418.2853 (M+H<sup>+</sup>), found 418.2853.

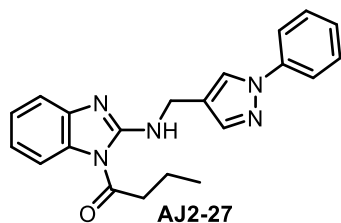

**1-(2-(((1-phenyl-1H-pyrazol-4-yl)methyl)amino)-1H-benzo[d]imidazol-1-yl)butan-1-one (AJ2-27):** Synthesized according to scheme 1, general procedure 1 and following general procedure 4, purified PTLC with Hexane : Ethyl acetate (6:4) to afford AJ2-27 as a colorless liquid (16 mg, 62 %); <sup>1</sup>H NMR (400 MHz, CDCl<sub>3</sub>) δ 8.12 – 8.09 (m, 1H), 8.04 – 7.98 (m, 1H), 7.82 – 7.79 (m, 1H), 7.69 – 7.63 (m, 2H), 7.49 – 7.37 (m, 4H), 7.31 – 7.24 (m, 3H), 7.08 (dd, *J* = 8.5, 1.3



Hz, 1H), 4.71 (d,  $J = 5.5$  Hz, 2H), 3.00 (t,  $J = 7.2$  Hz, 2H), 1.89 – 1.85 (m, 2H), 1.09 (t,  $J = 7.4$  Hz, 3H).  $^{13}\text{C}$  NMR (151 MHz,  $\text{CDCl}_3$ )  $\delta$  174.67, 154.76, 143.61, 140.78, 140.06, 130.12, 129.42, 126.51, 126.17, 124.93, 120.46, 120.41, 119.15, 117.21, 113.11, 40.31, 37.23, 17.25, 13.62. HRMS (ESI-TOF) calcd for  $\text{C}_{21}\text{H}_{22}\text{N}_5\text{O}$ , 360.1819 ( $\text{M}+\text{H}^+$ ), found 360.1816.

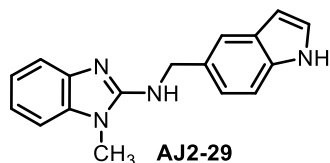

**N-((1H-indol-5-yl)methyl)-1-methyl-1H-benzo[d]imidazol-2-amine (AJ2-29):** Synthesized according to scheme 1, purified on Biotage<sup>®</sup> with Hexane : Ethyl acetate (4:6) to afford AJ2-29 as a brown solid (165 mg, 72 %);  $^1\text{H}$  NMR (400 MHz,  $\text{CDCl}_3$ )  $\delta$  8.40 (s, 1H), 7.70 (d,  $J = 1.6$  Hz, 1H), 7.53 (d,  $J = 7.7$  Hz, 1H), 7.42 – 7.36 (m, 1H), 7.31 – 7.24 (m, 2H), 7.16 – 7.12 (m, 1H), 7.10 – 7.05 (m, 2H), 6.55 (d,  $J = 1.1$  Hz, 1H), 4.81 (d,  $J = 5.1$  Hz, 2H), 4.24 (s, 1H), 3.46 (s, 3H).  $^{13}\text{C}$  NMR (151 MHz, DMSO)  $\delta$  155.74, 142.91, 135.78, 135.52, 130.85, 127.99, 125.93, 121.62, 120.66, 119.22, 118.73, 115.32, 111.57, 107.63, 101.37, 46.85, 28.69. HRMS (ESI-TOF) calcd for  $\text{C}_{17}\text{H}_{17}\text{N}_4$ , 277.1448 ( $\text{M}+\text{H}^+$ ), found 277.1441.

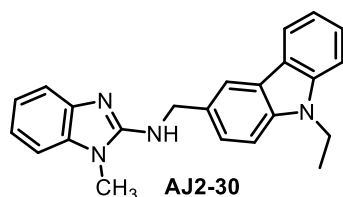

**N-((9-ethyl-9H-carbazol-3-yl)methyl)-1-methyl-1H-benzo[d]imidazol-2-amine (AJ2-30):** Synthesized according to scheme 1 and general procedure 1, purified on Biotage<sup>®</sup> with 0 to 6 % methanol gradient in dichloromethane to afford AJ2-30 as a white solid (248 mg, 76 %);  $^1\text{H}$  NMR (400 MHz, DMSO)  $\delta$  8.17 (t,  $J = 1.1$  Hz, 1H), 8.12 (dd,  $J = 7.8, 1.0$  Hz, 1H), 7.61 – 7.53 (m, 3H), 7.43 (dd,  $J = 8.3, 1.2$  Hz, 1H), 7.25 – 7.22 (m, 1H), 7.23 – 7.13 (m, 3H), 7.00 – 6.84 (m, 2H), 4.75 (d,  $J = 5.8$  Hz, 2H), 4.42 (q,  $J = 7.1$  Hz, 2H), 3.55 (s, 3H), 1.28 (t,  $J = 7.1$  Hz, 3H).  $^{13}\text{C}$  NMR (101 MHz,  $\text{CDCl}_3$ )  $\delta$  154.38, 142.32, 140.31, 139.55, 135.03, 128.90, 126.27, 125.89, 123.13, 122.67, 121.24, 120.52, 120.38, 119.61, 118.96, 116.53, 108.68, 108.59, 107.05, 48.26, 37.63, 28.24, 13.82. HRMS (ESI-TOF) calcd for  $\text{C}_{23}\text{H}_{23}\text{N}_4$ , 355.1917 ( $\text{M}+\text{H}^+$ ), found 355.1925.

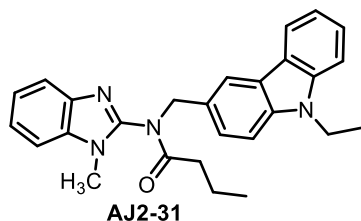

**N-((9-ethyl-9H-carbazol-3-yl)methyl)-N-(1-methyl-1H-benzo[d]imidazol-2-yl)butyramide (AJ2-31):** Synthesized according to scheme 1, general procedure 1 and following general procedure 3, purified on Biotage<sup>®</sup> with 0 to 5 % methanol gradient in dichloromethane to afford AJ2-31 as a white solid (64 mg, 52 %);  $^1\text{H}$  NMR (400 MHz, DMSO)  $\delta$  8.15 – 7.86 (m, 2H), 7.64 (d,  $J = 7.6$  Hz, 1H), 7.57 (d,  $J = 8.2$  Hz, 1H), 7.53 – 7.49 (m, 2H), 7.45 – 7.43 (m, 1H), 7.35 (d,  $J = 8.5$  Hz, 1H), 7.28 – 7.24 (m, 2H), 7.19 – 7.12 (m, 1H), 5.07 (s, 2H), 4.40 (q,  $J = 7.1$  Hz, 2H),

3.39 (s, 3H), 2.00 – 1.96 (m, 2H), 1.62 – 1.48 (m, 2H), 1.28 (t,  $J = 7.1$  Hz, 3H), 0.81 (d,  $J = 7.7$  Hz, 3H).  $^{13}\text{C}$  NMR (151 MHz, DMSO)  $\delta$  171.61, 147.34, 139.80, 139.16, 138.30, 133.94, 126.53, 125.82, 125.15, 122.23, 121.58, 121.29, 119.82, 119.61, 118.74, 118.12, 110.28, 108.53, 108.33, 50.42, 36.34, 34.55, 28.66, 17.24, 13.05, 12.90. Note: rotameric isomers observed, HRMS (ESI-TOF) calcd for  $\text{C}_{27}\text{H}_{29}\text{N}_4\text{O}$ , 425.2336 ( $\text{M}+\text{H}^+$ ), found 425.2353.

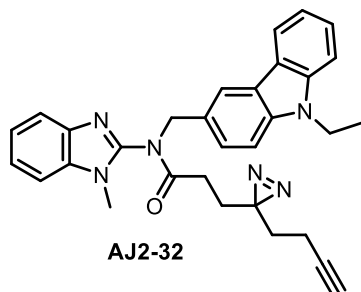

**3-(3-(but-3-yn-1-yl)-3H-diazirin-3-yl)-N-((9-ethyl-9H-carbazol-3-yl)methyl)-N-(1-methyl-1H-benzo[d]imidazol-2-yl)propanamide (AJ2-32):** Synthesized according to scheme 1 and general procedure 1 following general procedure 3, purified on Biotage<sup>®</sup> with 0 to 5 % methanol gradient in dichloromethane to afford AJ2-32 as a light brown viscous liquid (12 mg, 46 %);  $^1\text{H}$  NMR (400 MHz,  $\text{CDCl}_3$ )  $\delta$  8.00 (d,  $J = 7.8$  Hz, 1H), 7.97 (d,  $J = 1.6$  Hz, 1H), 7.83 (dd,  $J = 6.9, 2.1$  Hz, 1H), 7.50 – 7.46 (m, 1H), 7.41 (dd,  $J = 8.3, 1.0$  Hz, 1H), 7.39 – 7.26 (m, 4H), 7.25 – 7.18 (m, 2H), 5.19 (s, 2H), 4.34 (q,  $J = 7.2$  Hz, 2H), 3.05 (s, 3H), 2.02 – 1.96 (m, 3H), 1.95 – 1.81 (m, 4H), 1.62 (t,  $J = 7.4$  Hz, 2H), 1.42 (t,  $J = 7.2$  Hz, 3H).  $^{13}\text{C}$  NMR (151 MHz,  $\text{CDCl}_3$ )  $\delta$  171.28, 147.65, 140.97, 140.25, 139.62, 134.48, 127.08, 126.62, 125.93, 123.58, 123.05, 122.96, 122.63, 121.50, 120.61, 120.32, 118.99, 110.05, 108.57, 108.53, 82.69, 69.19, 52.72, 37.62, 32.42, 29.24, 28.16, 27.76, 27.67, 13.80, 13.22. Note: rotameric isomers observed, HRMS (ESI-TOF) calcd for  $\text{C}_{31}\text{H}_{31}\text{N}_6\text{O}$ , 503.2554 ( $\text{M}+\text{H}^+$ ), found 503.2556.

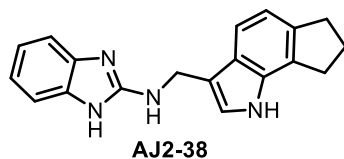

**N-((1,6,7,8-tetrahydrocyclopenta[g]indol-3-yl)methyl)-1H-benzo[d]imidazol-2-amine (AJ2-38):** Synthesized according to scheme 1 and general procedure 1, purified on Biotage<sup>®</sup> with 0 to 5 % methanol gradient in dichloromethane to afford AJ2-38 as an off white solid (64 mg, 72 %);  $^1\text{H}$  NMR (400 MHz,  $\text{CD}_3\text{OD}$ )  $\delta$  7.38 (d,  $J = 8.0$  Hz, 1H), 7.24 – 7.20 (m, 2H), 7.17 (s, 1H), 7.02 – 6.98 (m, 2H), 6.91 (d,  $J = 8.0$  Hz, 1H), 4.70 (s, 2H), 3.01 – 2.96 (m, 4H), 2.14 – 2.07 (m, 2H).  $^{13}\text{C}$  NMR (101 MHz,  $\text{CD}_3\text{OD}$ )  $\delta$  154.74, 137.63, 136.51, 133.87, 125.45, 125.30, 122.36, 120.45, 116.22, 115.69, 112.07, 111.32, 47.52, 47.31, 38.70, 25.02. HRMS (ESI-TOF) calcd for  $\text{C}_{19}\text{H}_{19}\text{N}_4$ , 303.1604 ( $\text{M}+\text{H}^+$ ), found 303.1602.

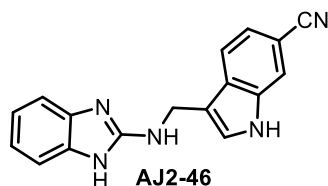

**3-(((1H-benzo[d]imidazol-2-yl)amino)methyl)-1H-indole-6-carbonitrile (AJ2-46):**

Synthesized according to scheme 1 and general procedure 1, purified on Biotage<sup>®</sup> with 10 to 70 % ethyl acetate gradient in hexane to afford AJ2-46 as a brown solid (35 mg, 58%); <sup>1</sup>H NMR (400 MHz, CD<sub>3</sub>OD) δ 7.83 – 7.75 (m, 2H), 7.61 – 7.57 (m, 1H), 7.30 (dd, *J* = 8.2, 1.5 Hz, 1H), 7.25 – 7.20 (m, 2H), 7.04 – 6.98 (m, 2H), 4.77 (d, *J* = 0.8 Hz, 2H). <sup>13</sup>C NMR (151 MHz, DMSO) δ 155.98, 135.58, 135.55, 130.16, 128.91, 121.68, 121.20, 120.54, 116.88, 114.67, 102.96, 37.89. HRMS (ESI-TOF) calcd for C<sub>17</sub>H<sub>14</sub>N<sub>5</sub>, 288.1244 (M+H<sup>+</sup>), found 288.1239.

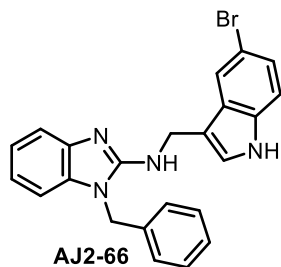**1-Benzyl-N-((5-bromo-1H-indol-3-yl)methyl)-1H-benzo[d]imidazol-2-amine (AJ2-66):**

Synthesized according to scheme 1 and general procedure 1, purified on Biotage<sup>®</sup> with 5 to 70 % ethyl acetate gradient in hexane to afford AJ2-66 as a brown solid (48 mg, 63%), <sup>1</sup>H NMR (400 MHz, CDCl<sub>3</sub>) δ 9.60 (s, 1H), 7.38 – 7.30 (m, 2H), 7.14 – 7.08 (m, 3H), 7.03 – 6.97 (m, 3H), 6.98 – 6.92 (m, 4H), 6.83 (d, *J* = 2.3 Hz, 1H), 4.92 (s, 2H), 4.51 (s, 2H). <sup>13</sup>C NMR (101 MHz, CDCl<sub>3</sub>) δ 153.72, 140.70, 135.15, 134.96, 134.32, 129.16, 128.24, 128.10, 126.53, 124.88, 124.68, 121.86, 121.07, 120.48, 115.77, 113.02, 112.76, 111.71, 107.89, 45.80, 39.24. HRMS (ESI-TOF) calcd for C<sub>23</sub>H<sub>20</sub>BrN<sub>4</sub>, 431.0866 (M+H<sup>+</sup>), found 431.0850.

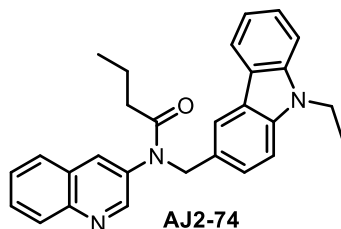**N-((9-ethyl-9H-carbazol-3-yl)methyl)-N-(quinolin-3-yl)butyramide (AJ2-74):**

Synthesized according to Scheme 1 and general procedure 1 followed by general procedure 4, purified on PTLC with Hexane : Ethyl acetate (6:4) to afford AJ2-74 as a brown solid (17 mg, 68%), <sup>1</sup>H NMR (400 MHz, CDCl<sub>3</sub>) δ 8.61 – 8.32 (m, 1H), 8.02 (d, *J* = 8.5 Hz, 1H), 7.92 (d, *J* = 7.7 Hz, 1H), 7.85 (d, *J* = 1.2 Hz, 1H), 7.71 – 7.57 (m, 3H), 7.46 (dd, *J* = 8.1, 1.1 Hz, 1H), 7.41 – 7.28 (m, 2H), 7.21 – 7.16 (m, 1H), 7.10 (dd, *J* = 7.0, 1.1 Hz, 1H), 5.10 (s, 2H), 4.26 (q, *J* = 7.2 Hz, 2H), 2.06 – 1.92 (m, 2H), 1.63 – 1.59 (m, 2H), 1.34 (t, *J* = 7.2 Hz, 3H), 0.77 (t, *J* = 7.4 Hz, 3H). <sup>13</sup>C NMR (151 MHz, CDCl<sub>3</sub>) δ 172.80, 150.98, 147.07, 140.23, 139.50, 135.81, 134.68, 130.14, 129.37, 127.91, 127.83, 127.46, 127.42, 126.90, 125.78, 123.07, 122.69, 121.15, 120.55, 118.85, 108.51, 108.47, 53.44, 37.61, 36.77, 18.87, 13.84, 13.82. HRMS (ESI-TOF) calcd for C<sub>28</sub>H<sub>28</sub>N<sub>3</sub>O, 422.2227 (M+H<sup>+</sup>), found 422.2217.

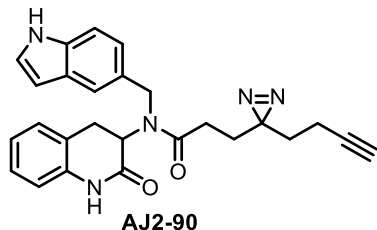

**N-((1H-indol-5-yl)methyl)-3-(3-(but-3-yn-1-yl)-3H-diazirin-3-yl)-N-(2-oxo-1,2,3,4-tetrahydroquinolin-3-yl)propenamide (AJ2-90):** Synthesized according to general scheme 2 and general procedure 2, purified by PTLC (Hexane/Ethyl acetate; 5:5) to afford AJ2-90 as white solid (12 mg, 46%),  $^1\text{H}$  NMR (400 MHz,  $\text{CDCl}_3$ )  $\delta$  8.27 (s, 1H), 7.87 (s, 1H), 7.48 (d,  $J = 1.7$  Hz, 1H), 7.34 (d,  $J = 8.4$  Hz, 1H), 7.19 (d,  $J = 2.4$  Hz, 1H), 7.07 – 7.03 (m, 2H), 6.91 (d,  $J = 7.4$  Hz, 1H), 6.85 – 6.81 (m, 1H), 6.64 – 6.60 (m, 1H), 6.48 – 6.49 (m, 1H), 4.88 – 4.83 (m, 1H), 4.72 – 4.59 (m, 2H), 3.42 – 3.34 (m, 1H), 2.74 – 2.70 (m, 1H), 2.27 – 2.15 (m, 2H), 1.89 – 1.77 (m, 4H), 1.56 – 1.49 (m, 2H).  $^{13}\text{C}$  NMR (151 MHz,  $\text{CDCl}_3$ )  $\delta$  172.65, 168.47, 136.18, 135.33, 128.43, 128.18, 127.71, 125.10, 123.06, 122.39, 120.73, 118.69, 114.96, 111.66, 102.69, 102.62, 82.86, 69.09, 55.58, 51.99, 32.49, 30.26, 29.72, 28.01, 27.72, 13.29. HRMS (ESI-TOF) calcd for  $\text{C}_{26}\text{H}_{26}\text{N}_5\text{NaO}_2$ , 462.1900 ( $\text{M}+\text{Na}^+$ ), found 462.1908.

### Supplementary references:

- 1) Parker C. G. *et al. Cell.* **2017**, *168*, 527 - 541.
- 2) Wang Y. *et al. Nat. Chem.*, **2019**, *11*, 1113 - 1123.
- 3) Kuhler, T. C. *et al. J. Med. Chem.* **2002**, *45*, 4282 - 4299.

## II. NMR spectra:

$^1\text{H}$  NMR ( $\text{CDCl}_3$ ) FFF-4

7.27  
7.24  
7.23  
7.22  
7.22  
7.22  
7.21  
7.20  
7.19  
7.15  
7.14  
7.13  
7.13  
7.10  
7.08  
6.98  
4.83  
4.64  
4.55  
4.45  
4.47  
3.75  
3.73  
3.71  
3.69  
3.67  
3.61  
3.60  
3.60  
3.57  
3.57  
3.44  
3.41  
3.41  
3.04  
3.04  
3.02  
3.02  
3.00  
3.00  
2.98  
2.97  
2.97  
2.19  
2.18  
2.17  
2.16  
2.16  
2.14  
2.13  
2.12  
2.07  
2.06  
2.05  
2.04  
2.04  
2.03  
2.02  
2.02  
1.99  
1.98  
1.98  
1.98  
1.97  
1.97  
1.93  
1.93  
1.91  
1.91  
1.91  
1.89  
1.89  
1.89  
1.71  
1.69  
1.67  
1.67  
1.30  
1.27  
1.25

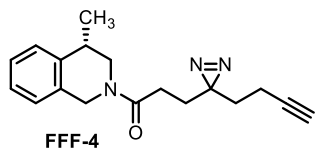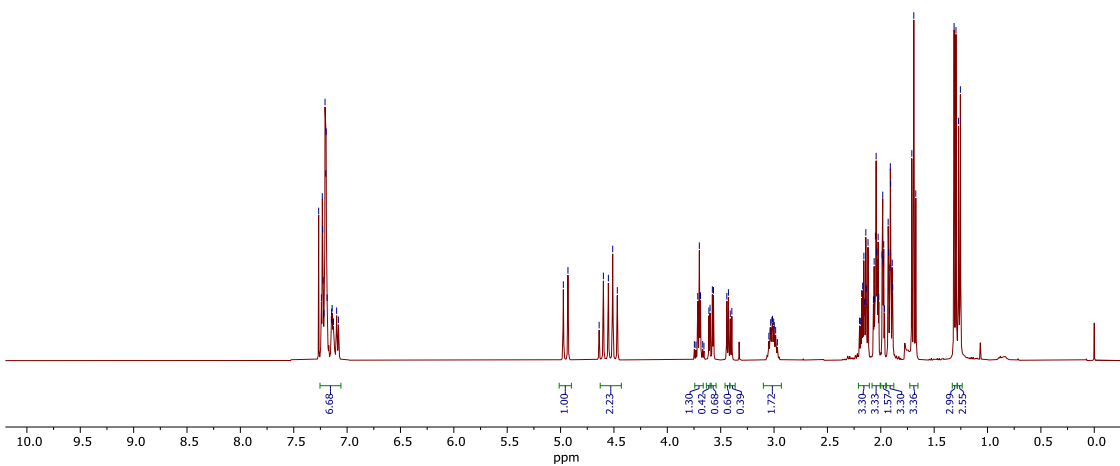

<sup>1</sup>H NMR (CDCl<sub>3</sub>) FFF-5

5.27  
5.25  
3.74  
3.72  
3.71  
3.70  
3.69  
3.68  
3.67  
2.05  
2.04  
2.03  
2.02  
2.01  
2.00  
2.00  
1.99  
1.98  
1.97  
1.96  
1.96  
1.95  
1.95  
1.93  
1.93  
1.92  
1.92  
1.91  
1.91  
1.90  
1.88  
1.87  
1.86  
1.86  
1.85  
1.85  
1.84  
1.84  
1.73  
1.72  
1.72  
1.70  
1.69  
1.68  
1.67  
1.66  
1.66  
1.64  
1.63  
1.63  
1.62  
1.62  
1.60  
1.60  
1.59  
1.59  
1.56  
1.57  
1.55  
1.54  
1.54  
1.53  
1.52  
1.52  
1.51  
1.51  
1.49  
1.48  
1.48  
1.48  
1.47  
1.47  
1.46  
1.45  
1.45  
1.44  
1.44  
1.04  
1.03

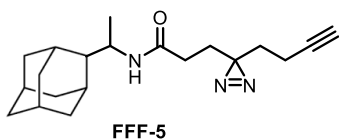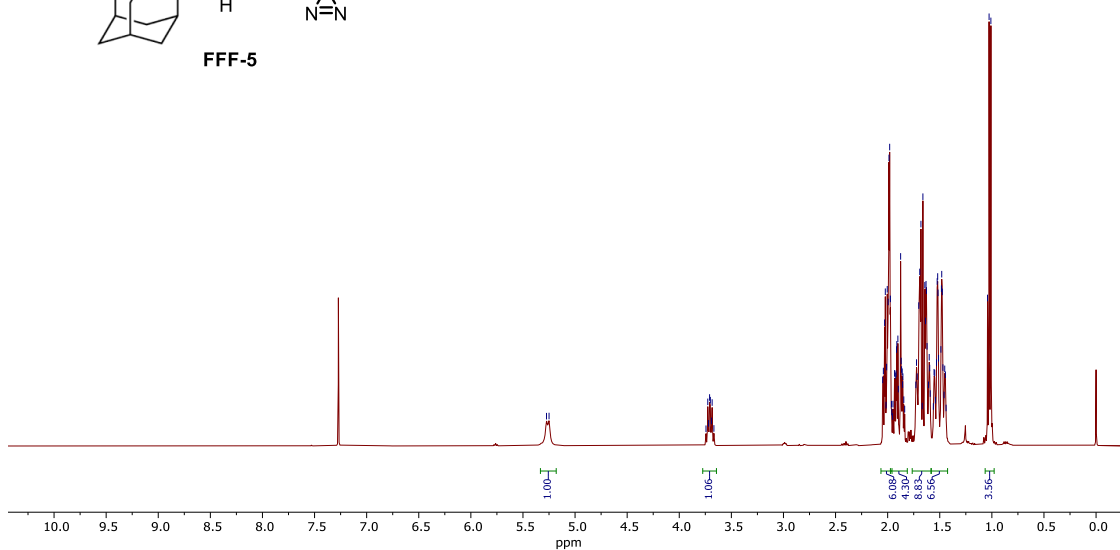

<sup>13</sup>C NMR (CDCl<sub>3</sub>) FFF-5

AMJ-A-37.2.1.1r

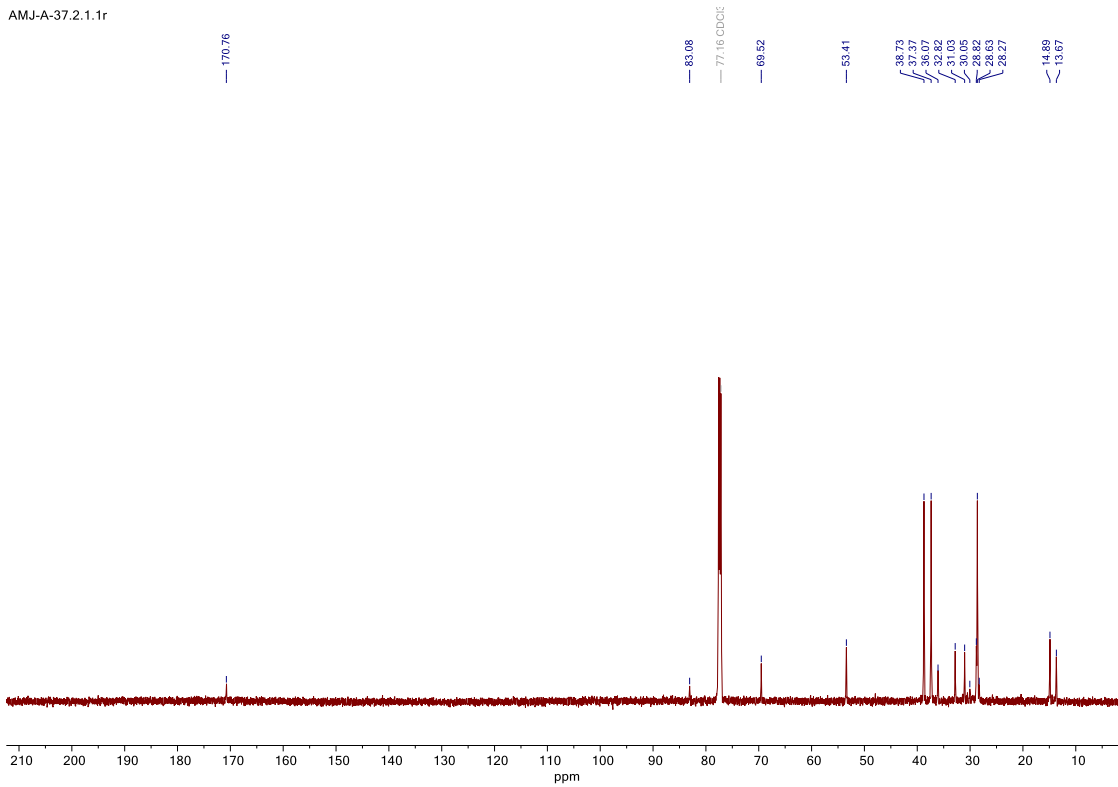

<sup>1</sup>H NMR (CDCl<sub>3</sub>) FFF-8

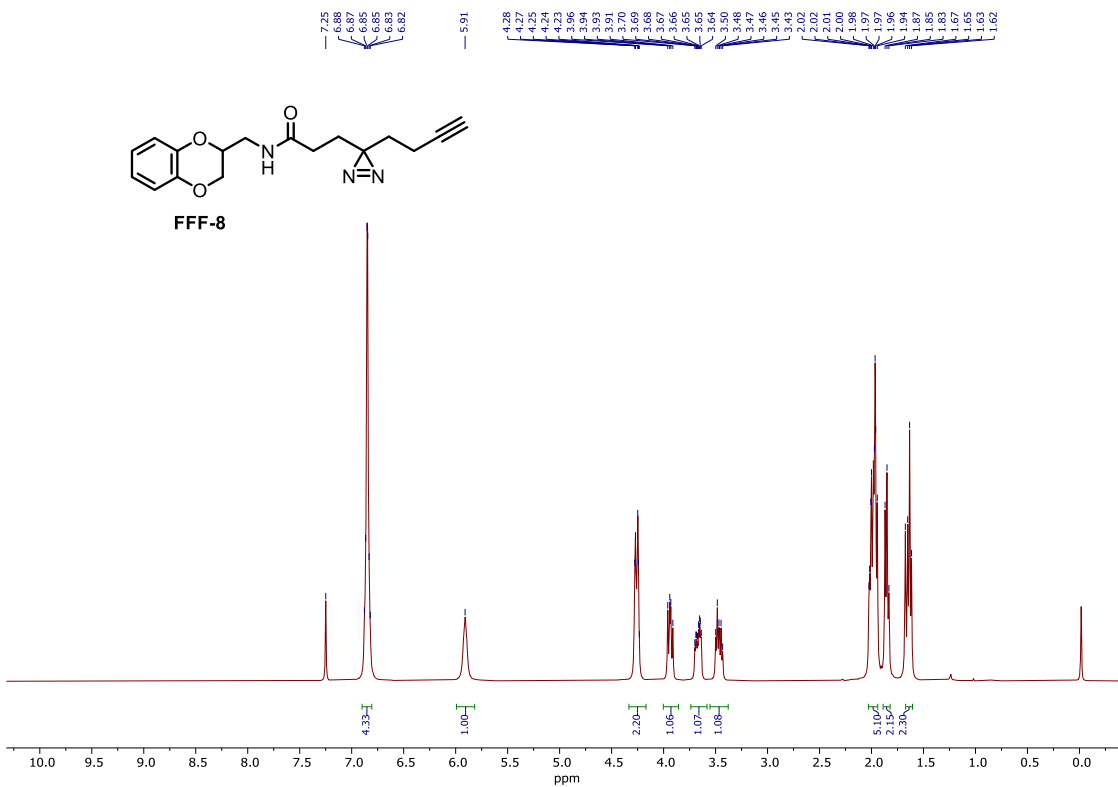

<sup>13</sup>C NMR (CDCl<sub>3</sub>) FFF-8

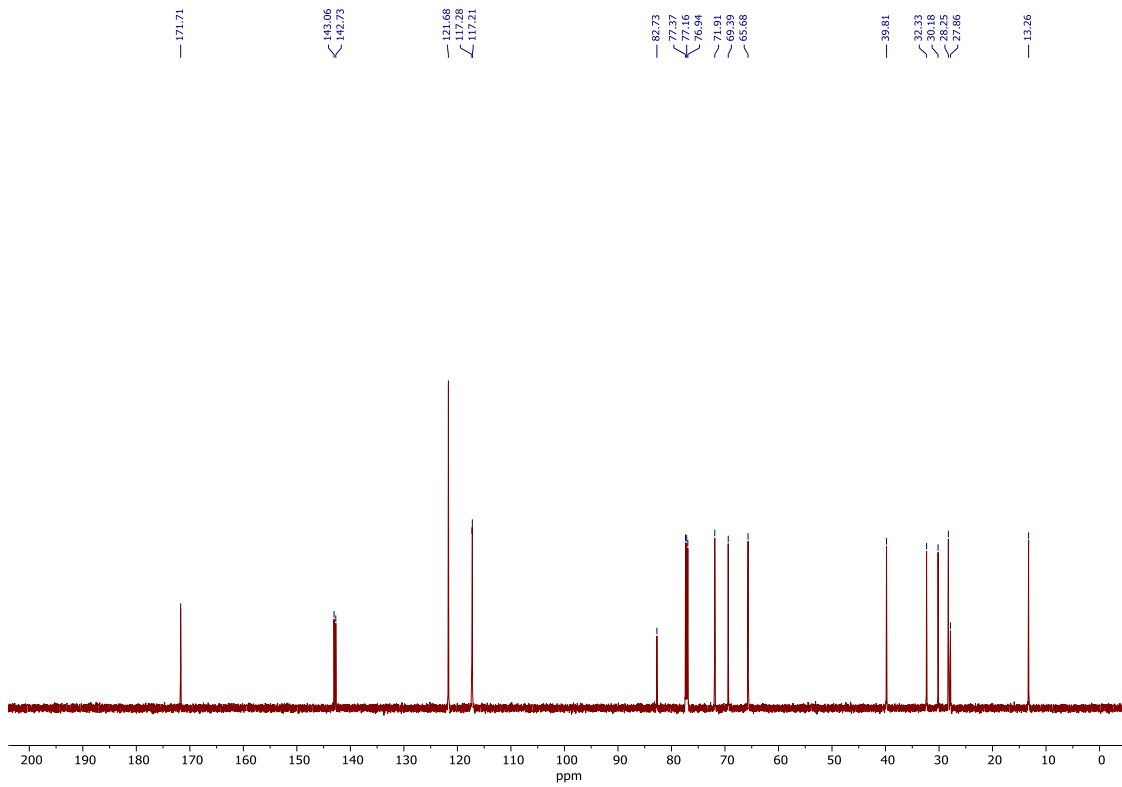

<sup>1</sup>H NMR (CDCl<sub>3</sub>) FFF-9

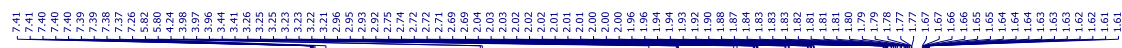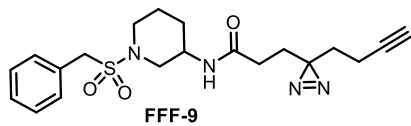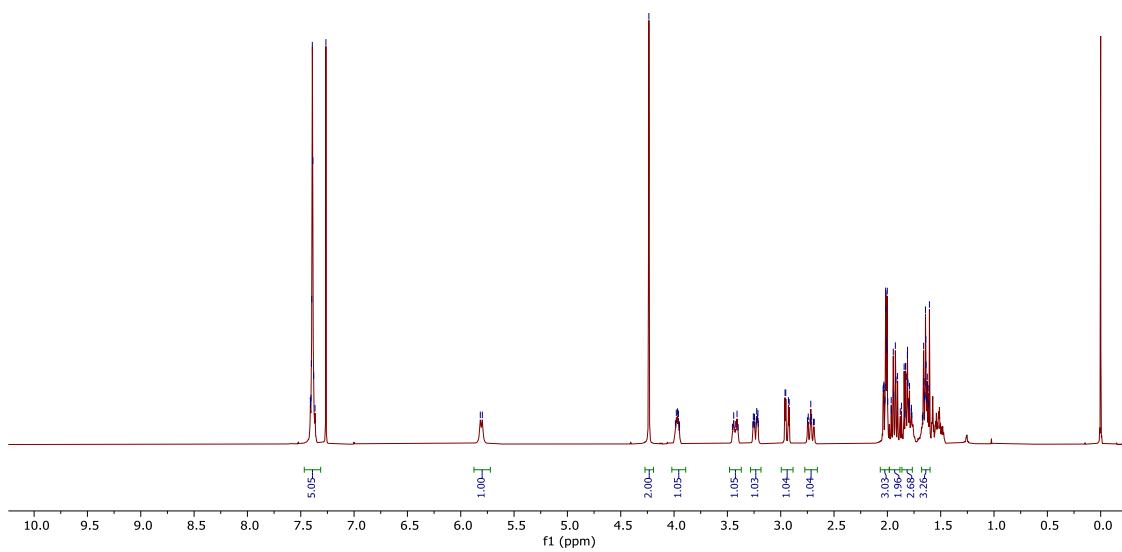

<sup>1</sup>H NMR (CDCl<sub>3</sub>) FFF-12

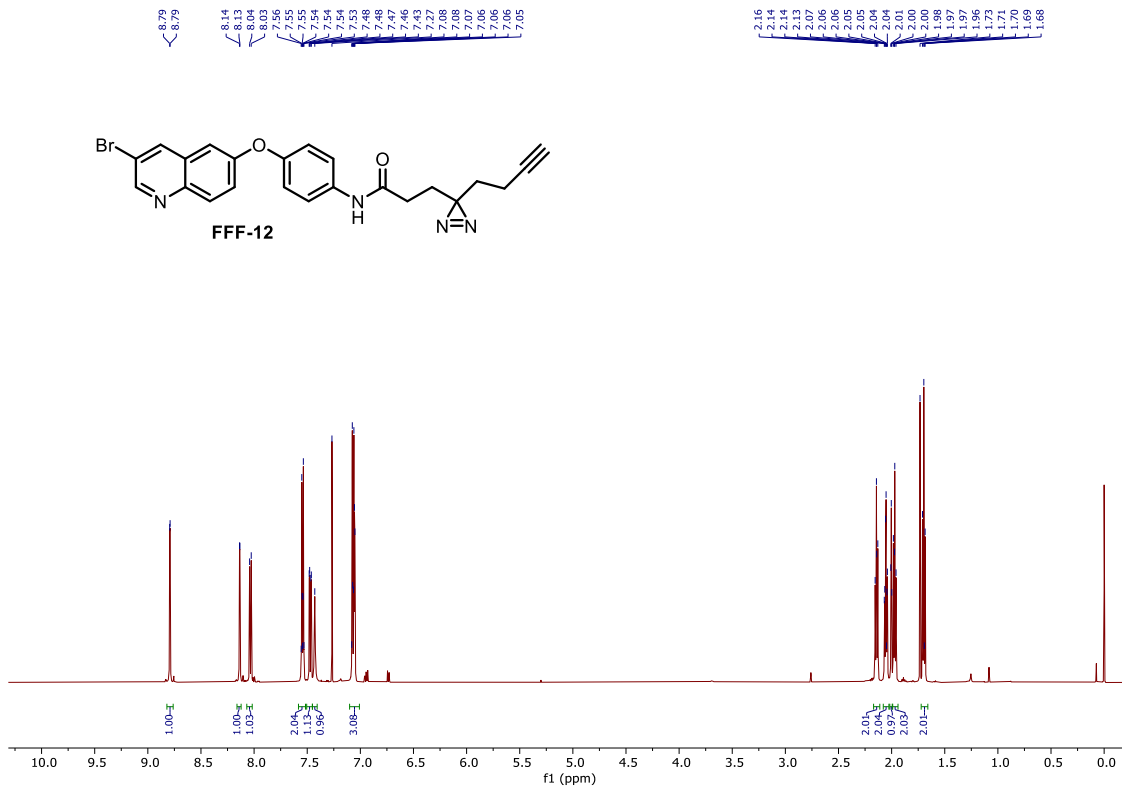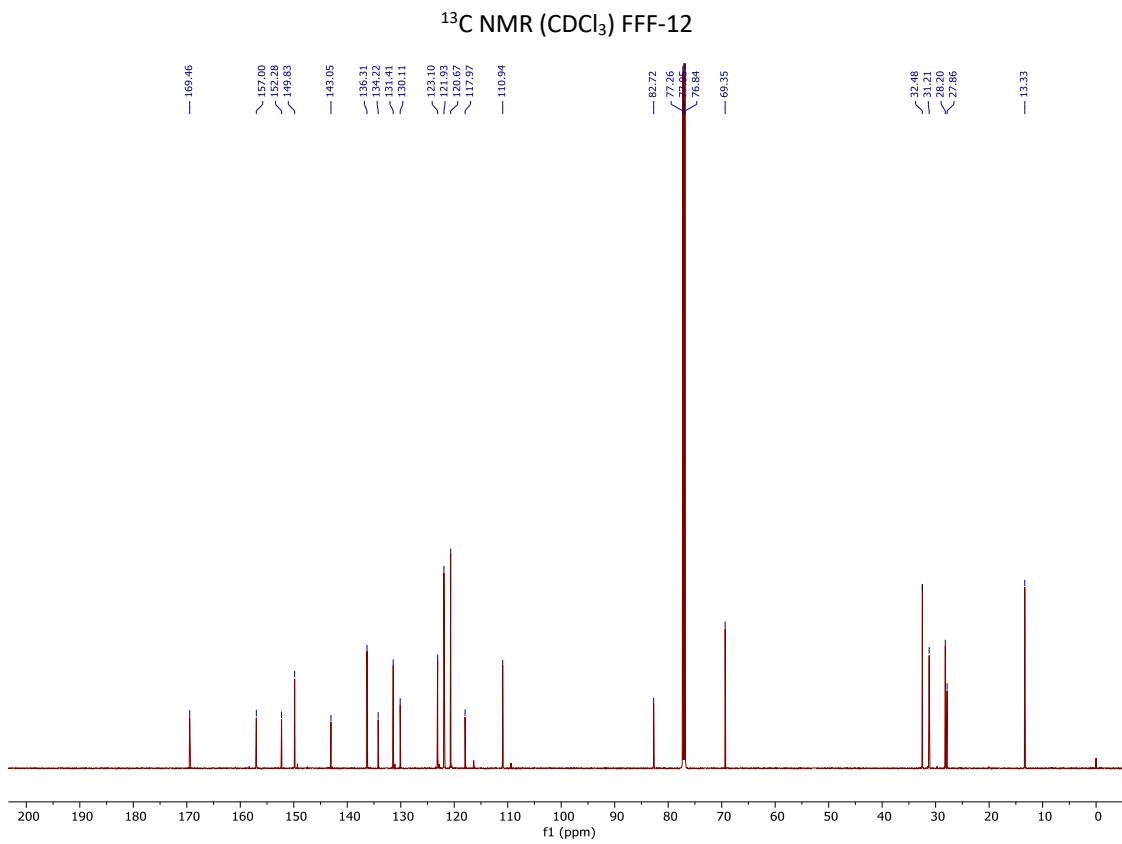

$^1\text{H}$  NMR (CDCl<sub>3</sub>) FFF-13



7.38  
7.37  
7.31  
7.29  
7.25  
7.24  
7.23  
7.21  
7.20  
7.18  
7.16  
6.80  
6.27  
6.26  
6.25  
6.25  
6.24  
6.24  
6.02  
5.88  
5.88  
3.77  
3.76  
3.60  
3.58  
3.56  
3.56  
3.55  
3.03  
3.02  
2.99  
2.99  
2.98  
2.97  
2.96  
2.94  
2.93  
2.91  
2.90  
2.89  
2.89  
2.79  
2.79  
2.61  
2.60  
2.55  
2.55  
2.51  
2.34  
2.32  
2.21  
2.18  
2.17  
2.15  
2.13  
2.13  
2.09  
2.05  
2.04  
2.04  
2.00  
2.00  
1.97  
1.96  
1.95  
1.94  
1.94  
1.93  
1.93  
1.91  
1.90  
1.89  
1.88  
1.69  
1.67

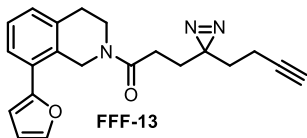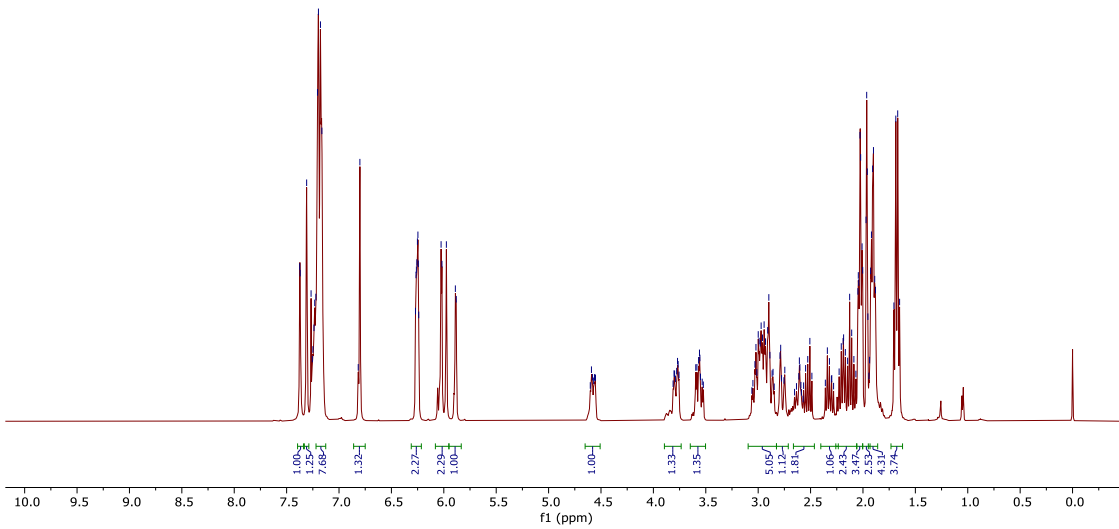

<sup>1</sup>H NMR (CDCl<sub>3</sub>) FFF-16

7.35  
7.35  
7.34  
7.34  
7.33  
7.33  
7.33  
7.31  
7.31  
7.30  
7.30  
7.27  
7.27  
7.24  
7.24  
7.24  
7.22  
7.22  
6.21  
3.80  
3.78  
3.76  
3.64  
3.64  
3.62  
3.61  
3.59  
3.59  
3.56  
3.54  
3.54  
3.53  
3.53  
2.76  
2.73  
2.73  
2.72  
2.72  
2.71  
1.12  
2.70  
2.59  
2.57  
2.56  
2.54  
2.54  
2.53  
2.04  
2.02  
2.02  
1.99  
1.99  
1.98  
1.97  
1.95  
1.95  
1.93  
1.93  
1.85  
1.84  
1.84  
1.84  
1.67  
1.65  
1.65  
1.63  
1.47

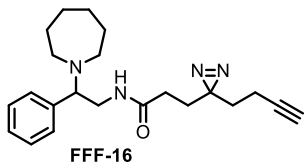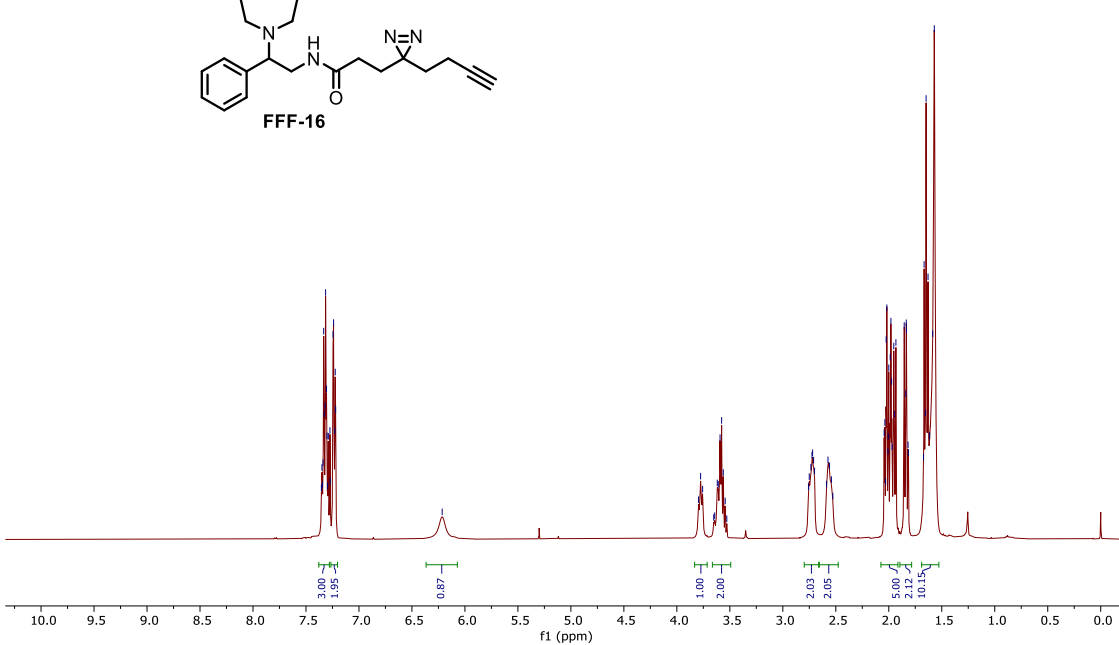

<sup>1</sup>H NMR (CDCl<sub>3</sub>) FFF-17

8.91  
8.91 (CDCl<sub>3</sub>)  
7.726  
7.716  
7.714  
7.713  
7.712  
7.711  
7.705  
7.700  
7.698  
6.998  
6.996  
6.994  
6.978  
6.977  
6.463  
6.459  
3.71  
3.70  
3.69  
3.66  
3.66  
3.53  
3.53  
3.49  
3.46  
3.46  
3.06  
3.03  
3.02  
3.01  
2.99  
2.98  
2.07  
2.05  
2.05  
2.03  
2.02  
2.01  
2.01  
2.00  
2.00  
1.99  
1.98  
1.97  
1.96  
1.95  
1.95  
1.92  
1.91  
1.89  
1.89  
1.87  
1.86  
1.86  
1.84  
1.84  
1.81  
1.69  
1.68  
1.67  
1.66  
1.65

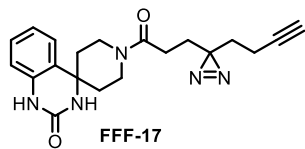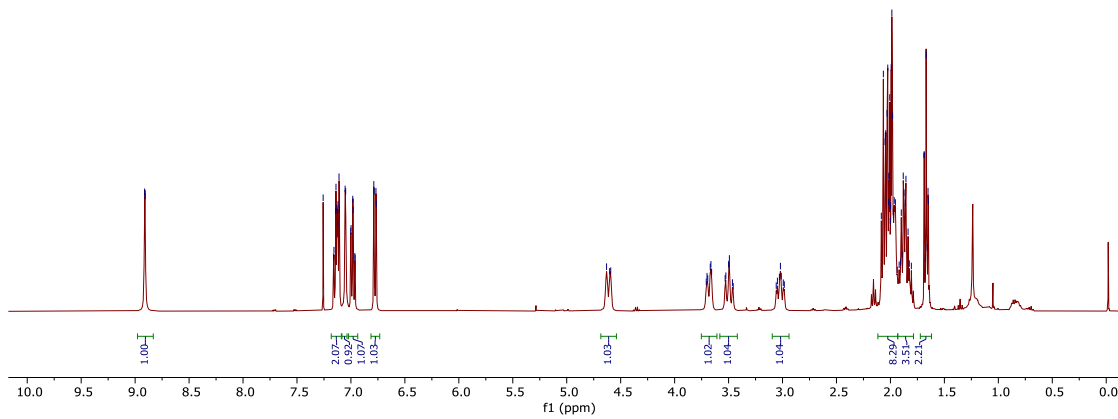

<sup>13</sup>C NMR (CDCl<sub>3</sub>) FFF-17

169.53  
154.96  
135.65  
128.61  
125.12  
123.84  
122.87  
114.80  
82.82  
77.40  
77.08  
76.76  
69.27  
55.00  
40.52  
38.13  
36.78  
36.53  
28.03  
27.96  
26.86  
13.34

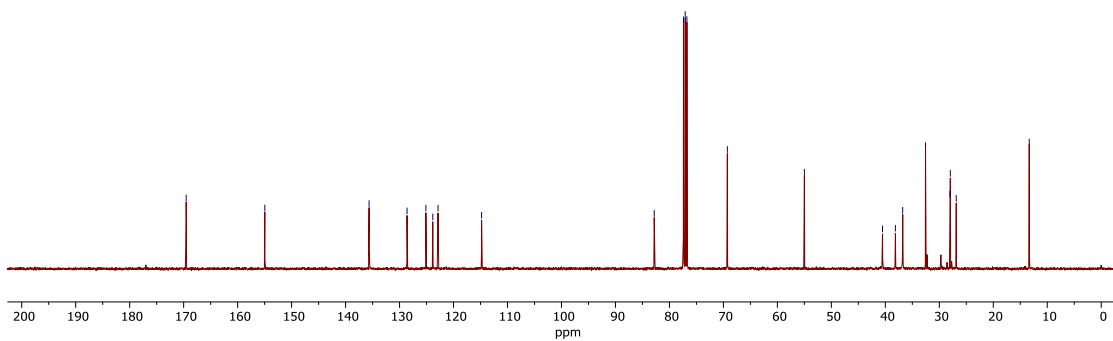

<sup>1</sup>H NMR (CDCl<sub>3</sub>) FFF-18

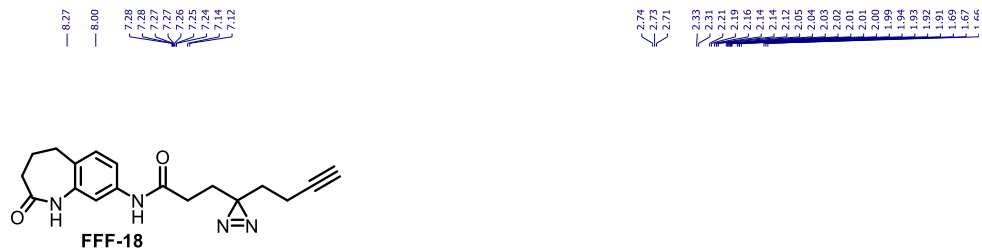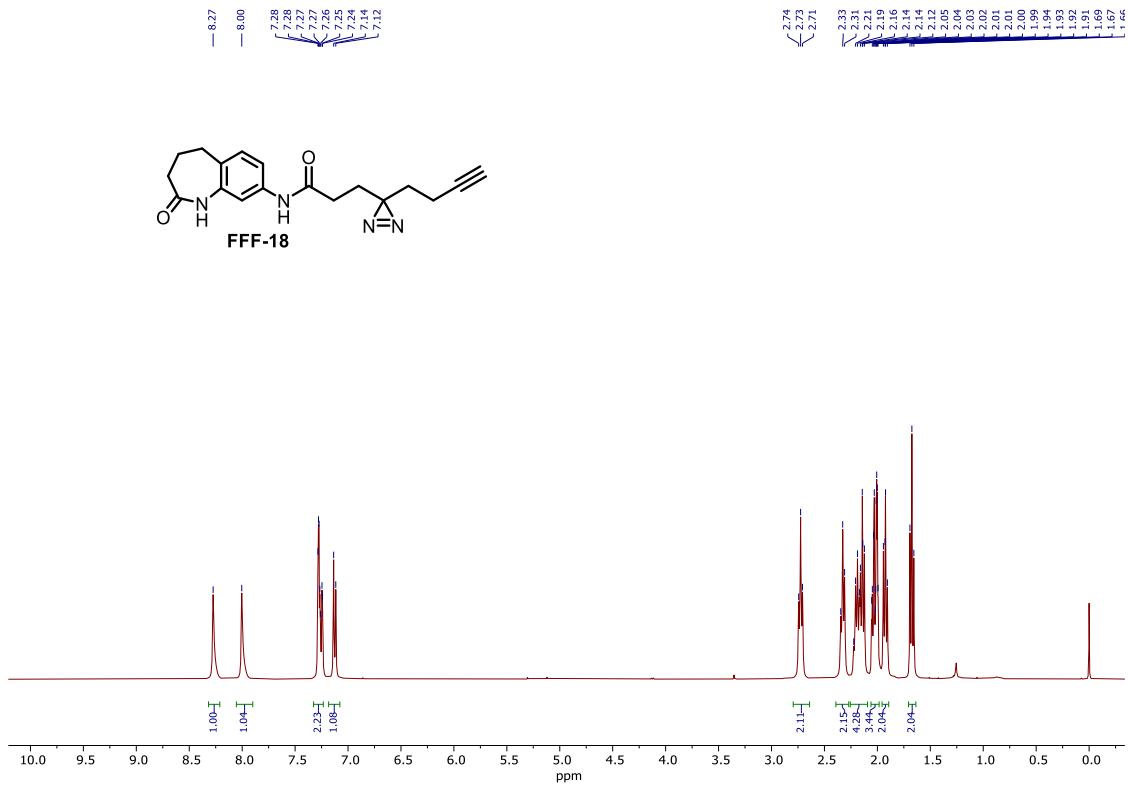

$^{13}\text{C}$  NMR (CDCl<sub>3</sub>) FFF-18

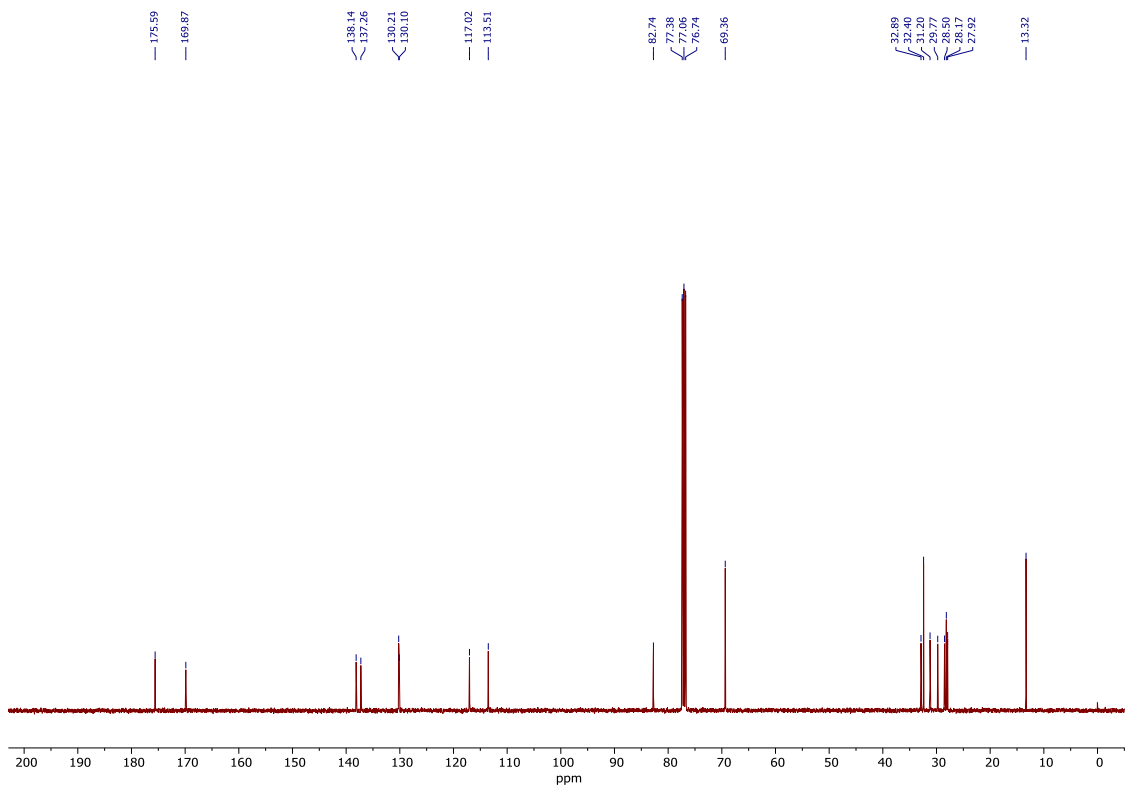

$^1\text{H}$  NMR (CDCl<sub>3</sub>) FFF-19

7.32  
7.32  
7.29  
7.26  
7.25  
7.23  
7.23  
7.21  
7.21  
7.20  
7.19  
7.19  
7.19  
7.18  
7.17  
7.10  
7.10  
7.08  
7.08  
6.93  
6.93  
6.92  
6.91  
6.91  
6.87  
6.87  
6.85  
6.85  
6.39  
4.46  
4.45  
4.45  
4.37  
4.37  
4.34  
4.34  
3.52  
3.52  
3.51  
3.51  
3.48  
3.48  
3.29  
3.29  
3.28  
3.28  
3.25  
3.25  
2.72  
2.72  
2.72  
1.93  
1.93  
1.92  
1.92  
1.91  
1.91  
1.90  
1.90  
1.88  
1.88  
1.87  
1.87  
1.86  
1.86  
1.85  
1.85  
1.84  
1.84  
1.61  
1.61  
1.59  
1.59  
1.55  
1.55  
1.53  
1.53  
1.50  
1.50  
1.48  
1.48  
1.46  
1.46  
1.44  
1.44  
1.43

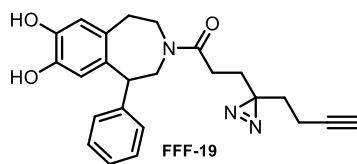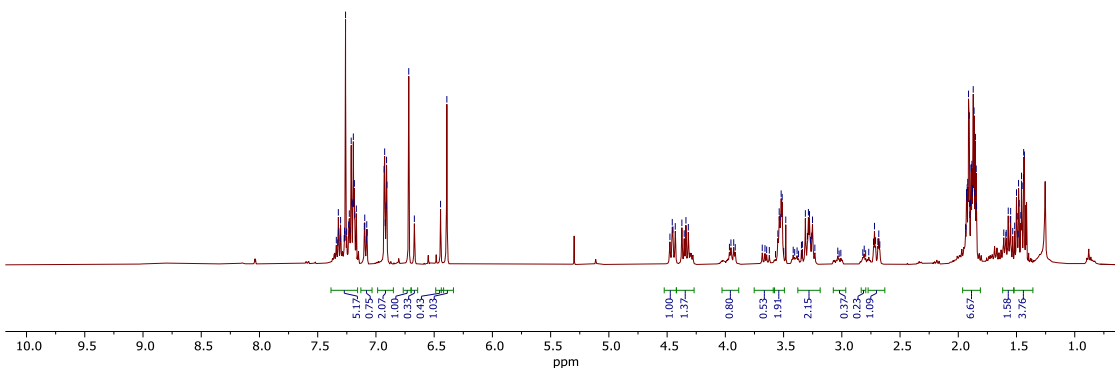

<sup>1</sup>H NMR (CDCl<sub>3</sub>) FFF-20

7.33  
7.32  
7.31  
7.30  
7.30  
7.29  
7.28  
7.28  
7.26  
7.25  
7.24  
7.24  
7.23  
7.23  
7.22  
7.22  
7.21  
7.21  
7.15  
7.14  
7.13  
7.13  
6.95  
6.95  
4.68  
4.68  
4.57  
4.55  
4.55  
4.54  
4.54  
4.52  
4.49  
4.45  
3.26  
3.26  
3.26  
3.23  
3.20  
2.63  
2.63  
2.01  
2.00  
2.00  
2.00  
1.98  
1.98  
1.97  
1.96  
1.96  
1.95  
1.95  
1.95  
1.78  
1.76  
1.76  
1.75  
1.74  
1.74  
1.63  
1.63  
1.62  
1.61  
1.61  
1.60  
1.60

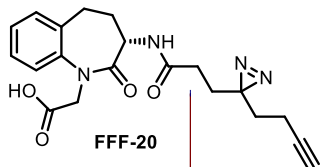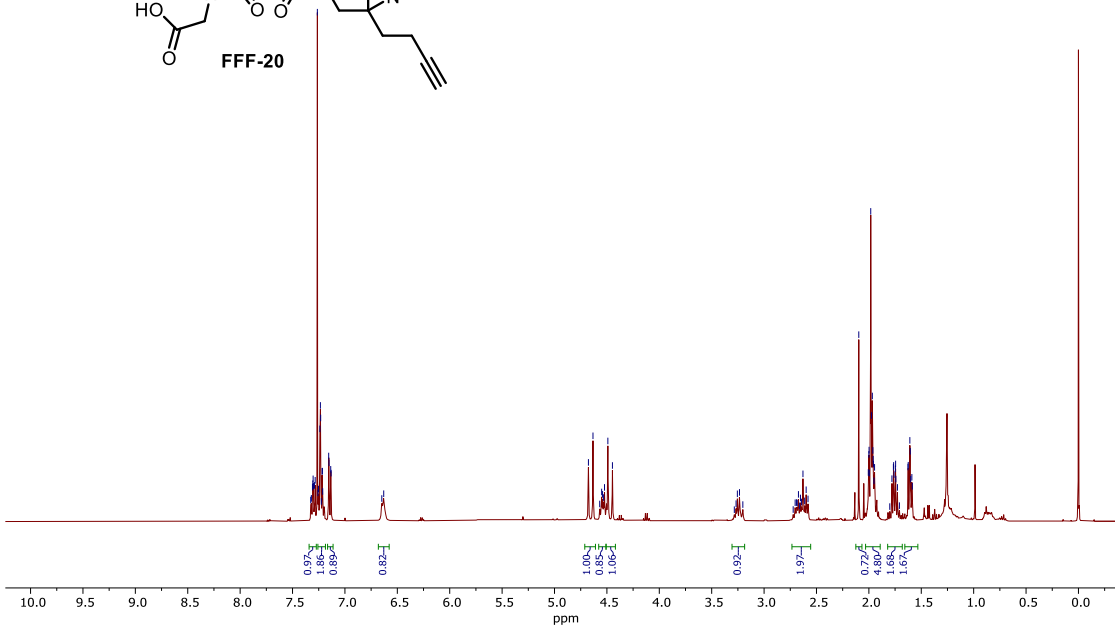

<sup>1</sup>H NMR (CDCl<sub>3</sub>) FFF-21

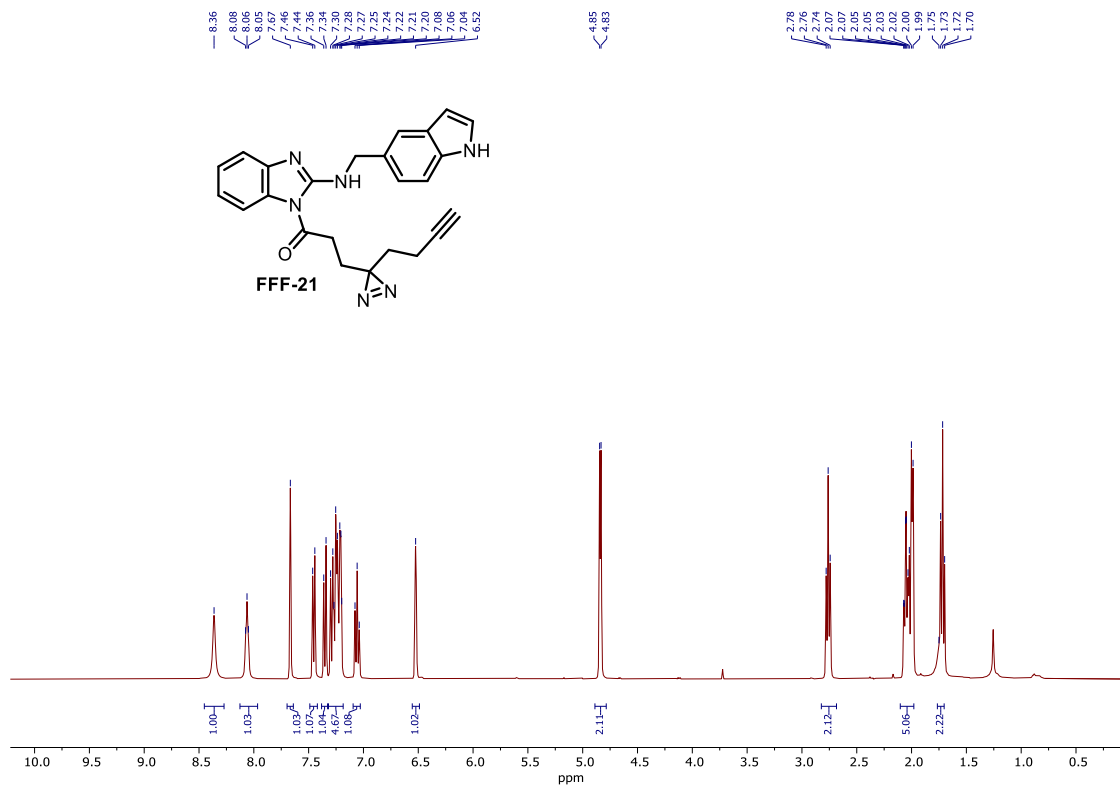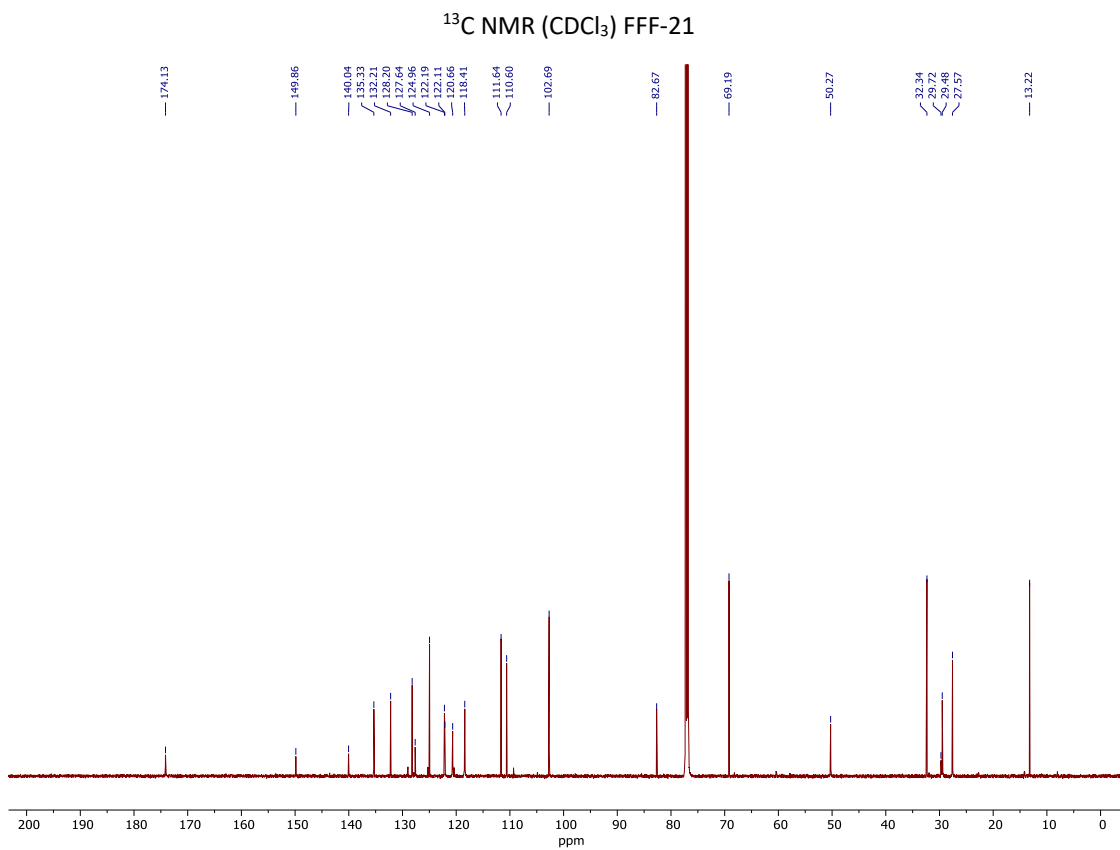

<sup>1</sup>H NMR (CDCl<sub>3</sub>) FFF-22

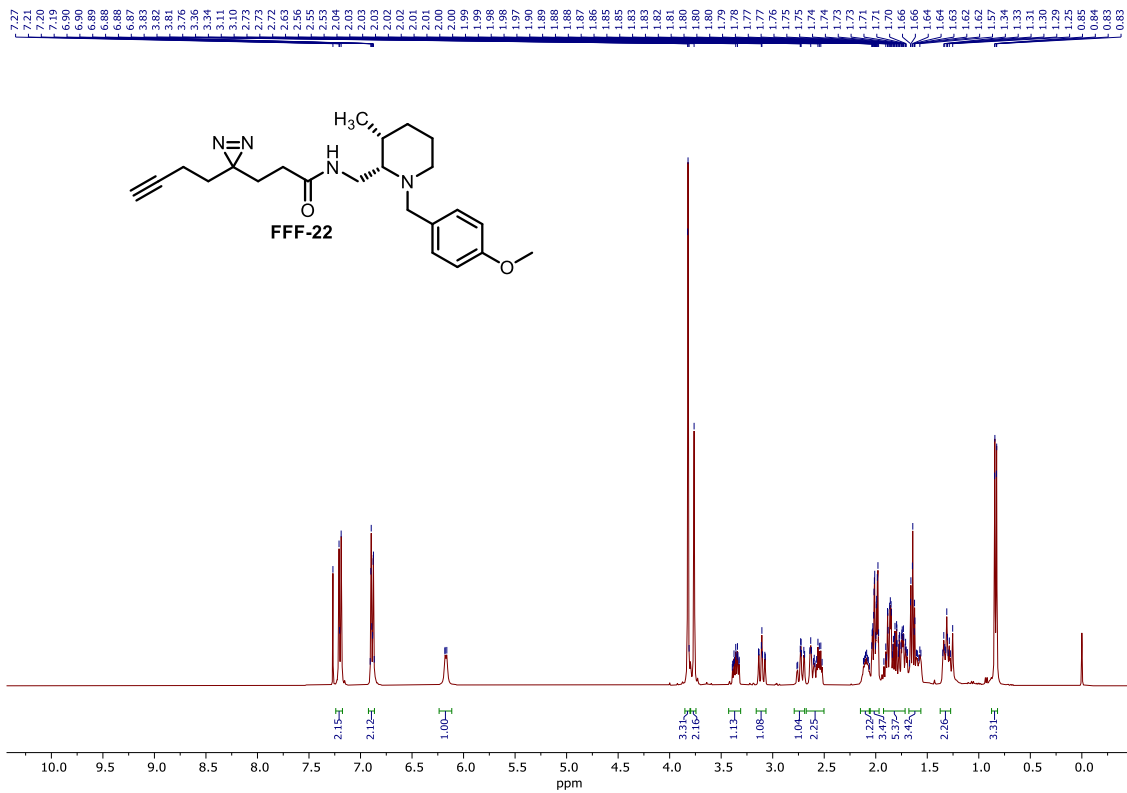

**<sup>13</sup>C NMR (CDCl<sub>3</sub>) FFF-22**

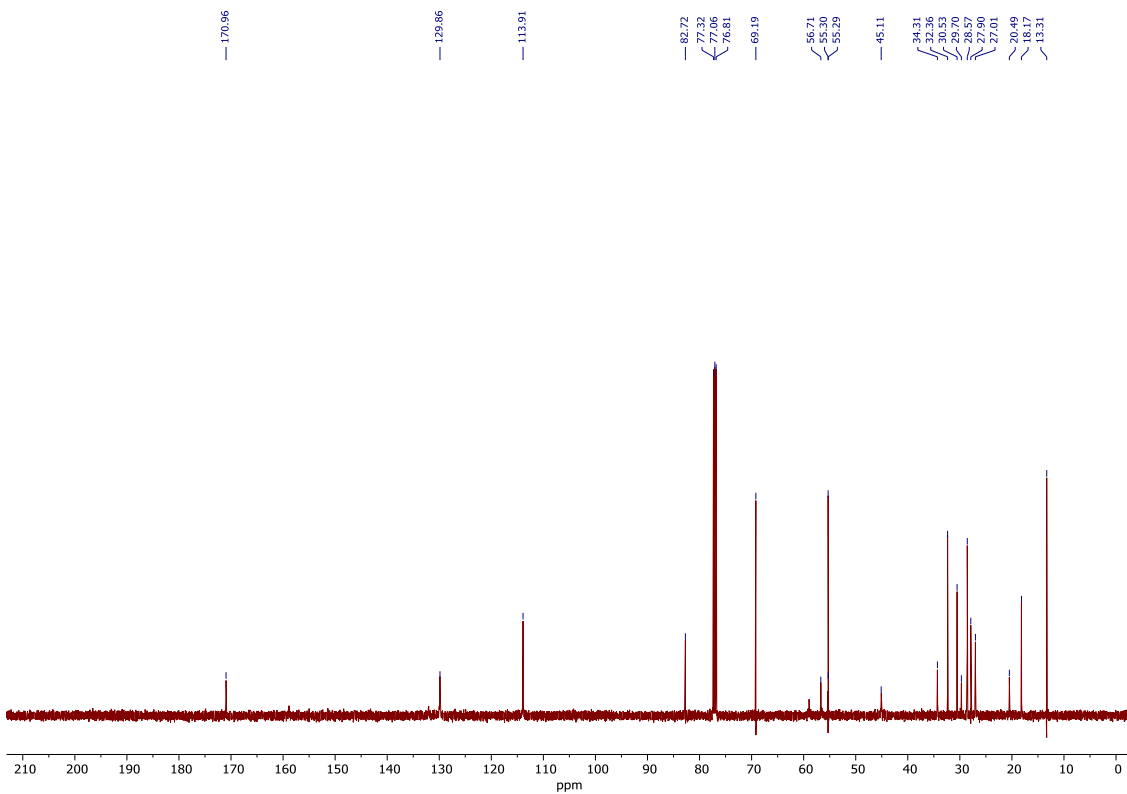

**<sup>1</sup>H NMR (CDCl<sub>3</sub>) FFF-23**

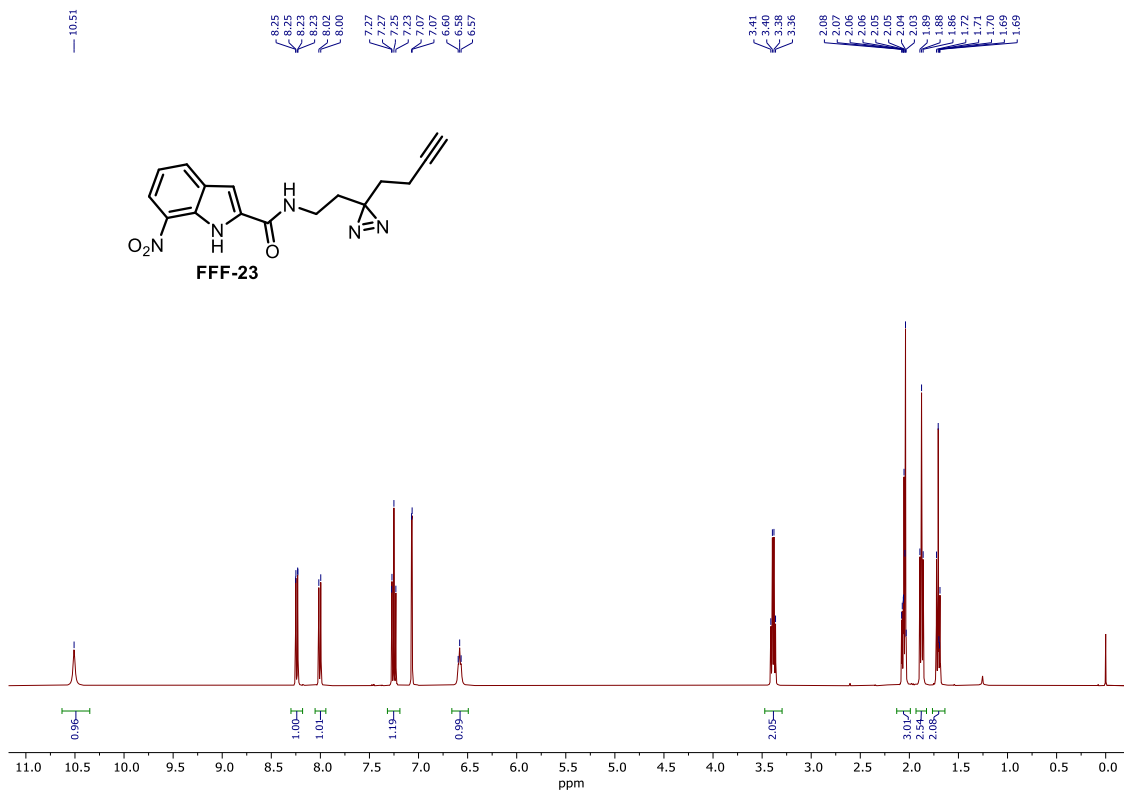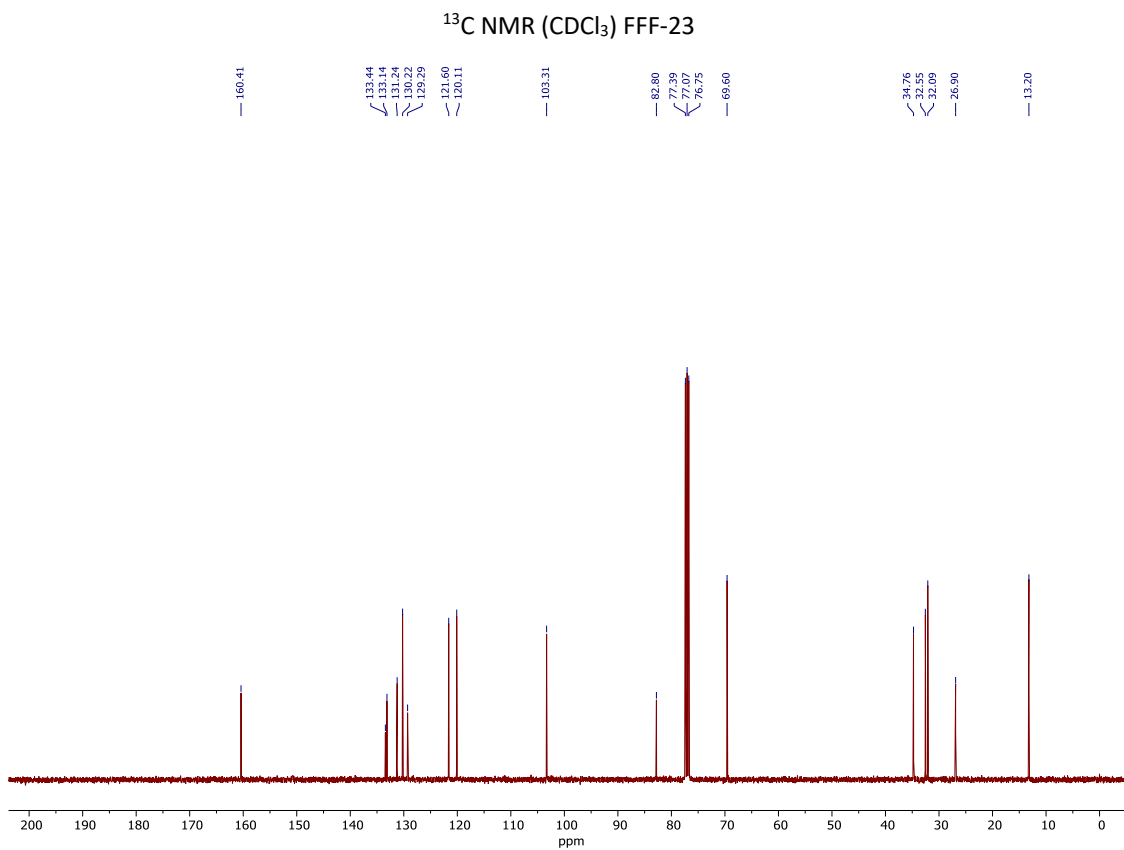

<sup>1</sup>H NMR (CDCl<sub>3</sub>) FFF-24





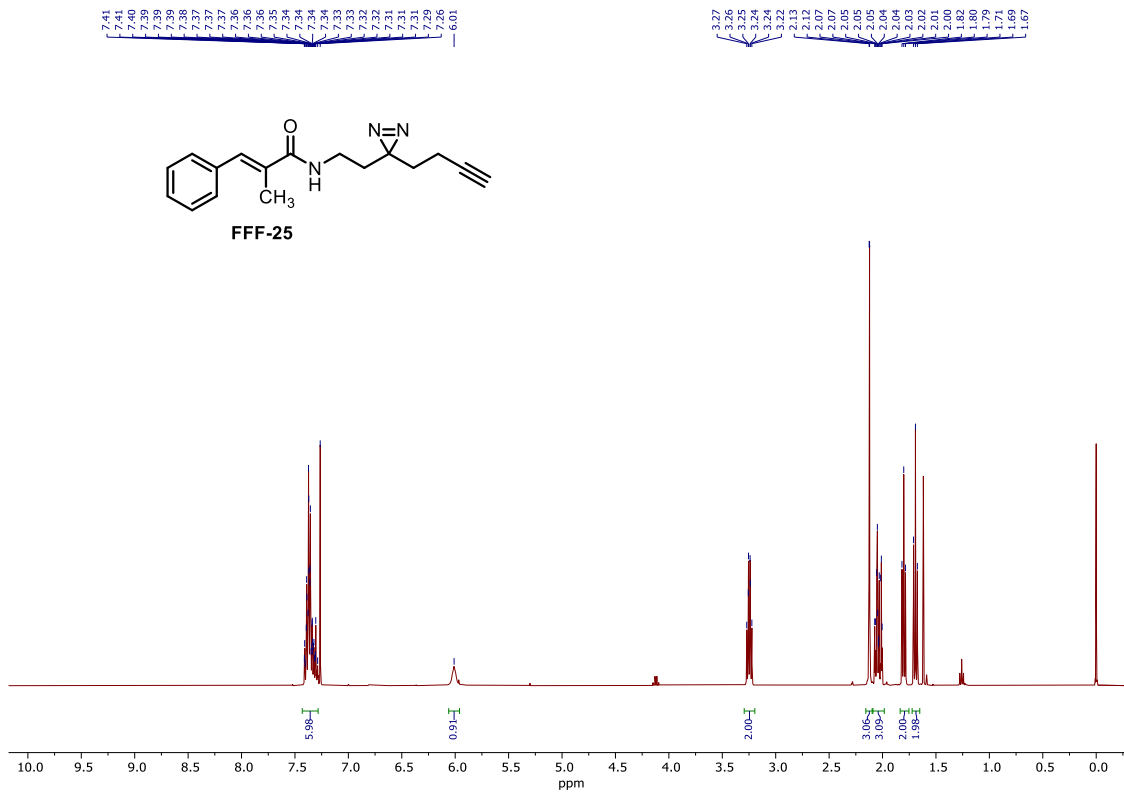

<sup>1</sup>H NMR (CDCl<sub>3</sub>) FFF-26

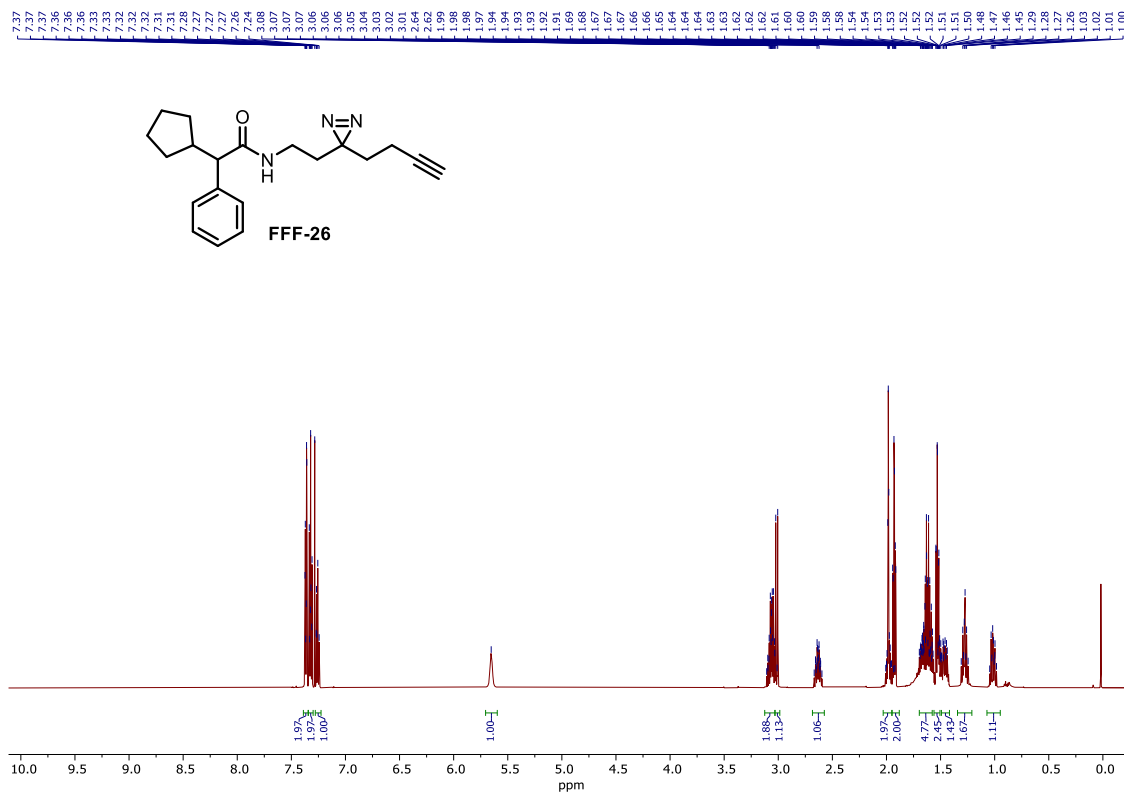

<sup>13</sup>C NMR (CDCl<sub>3</sub>) FFF-26



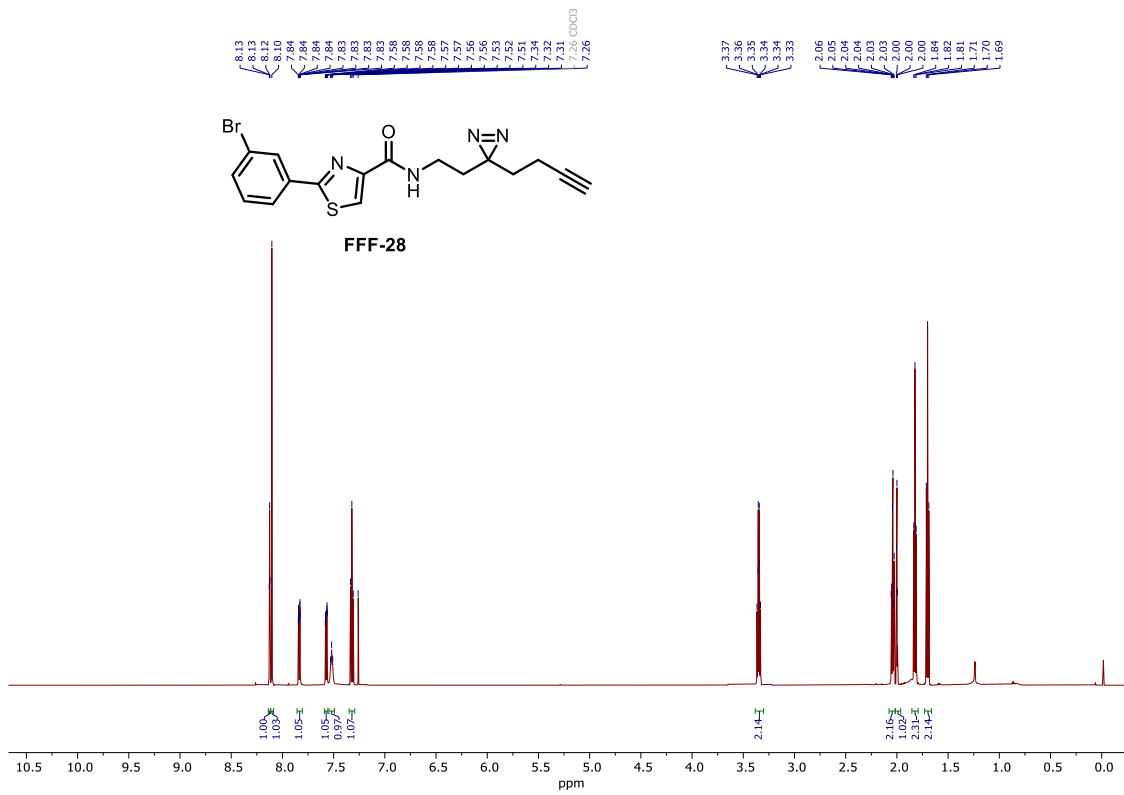

**<sup>13</sup>C NMR (CDCl<sub>3</sub>) FFF-28**

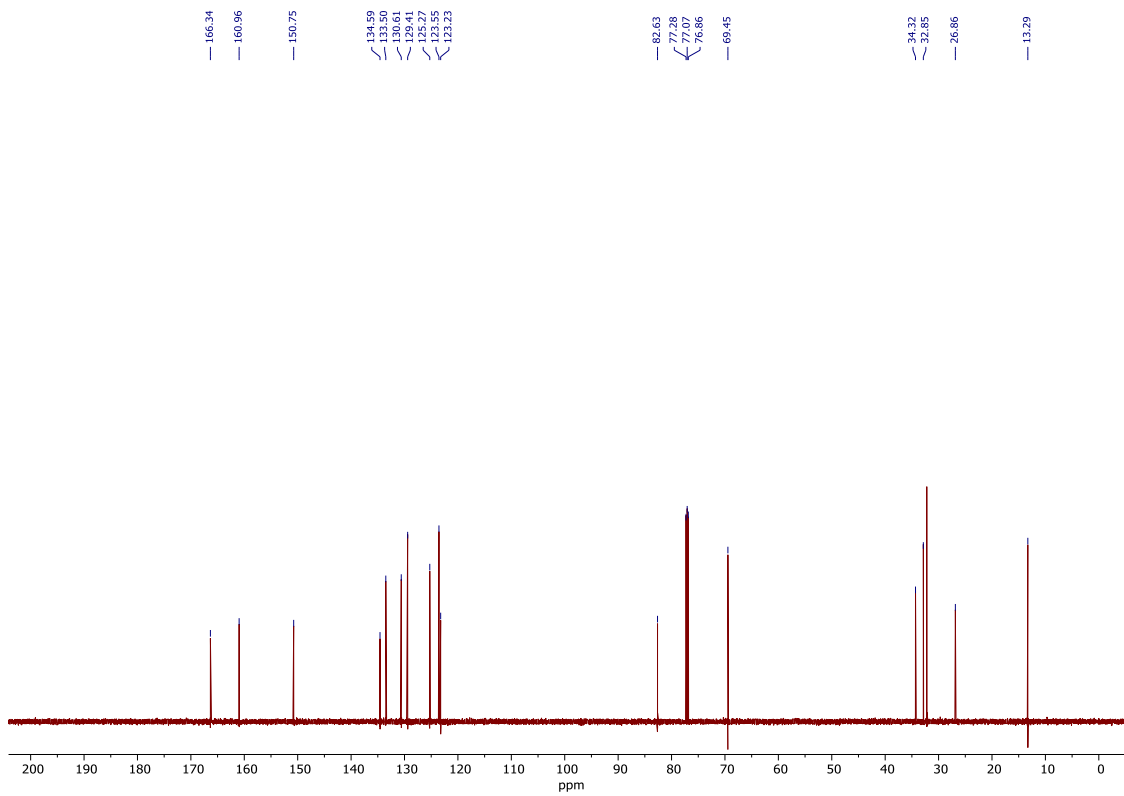

**<sup>1</sup>H NMR (CDCl<sub>3</sub>) FFF-29**

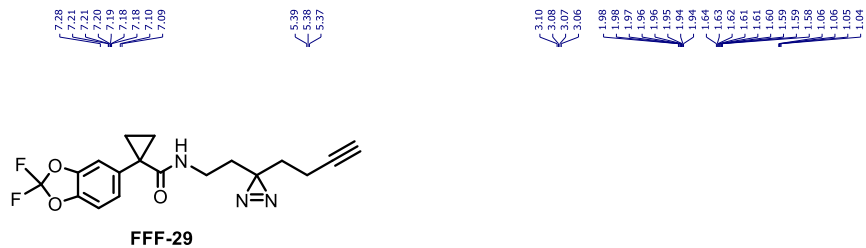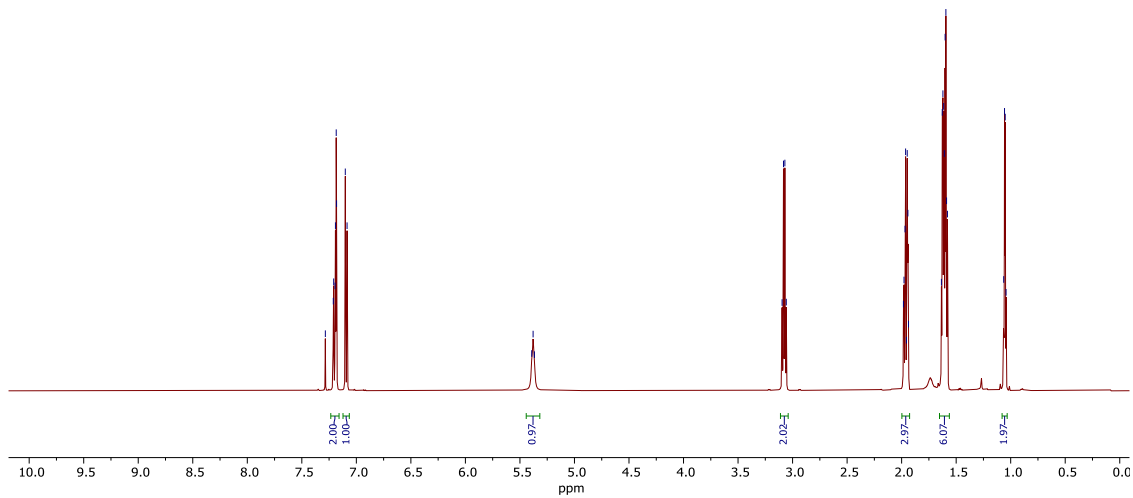

<sup>13</sup>C NMR (CDCl<sub>3</sub>) FFF-29

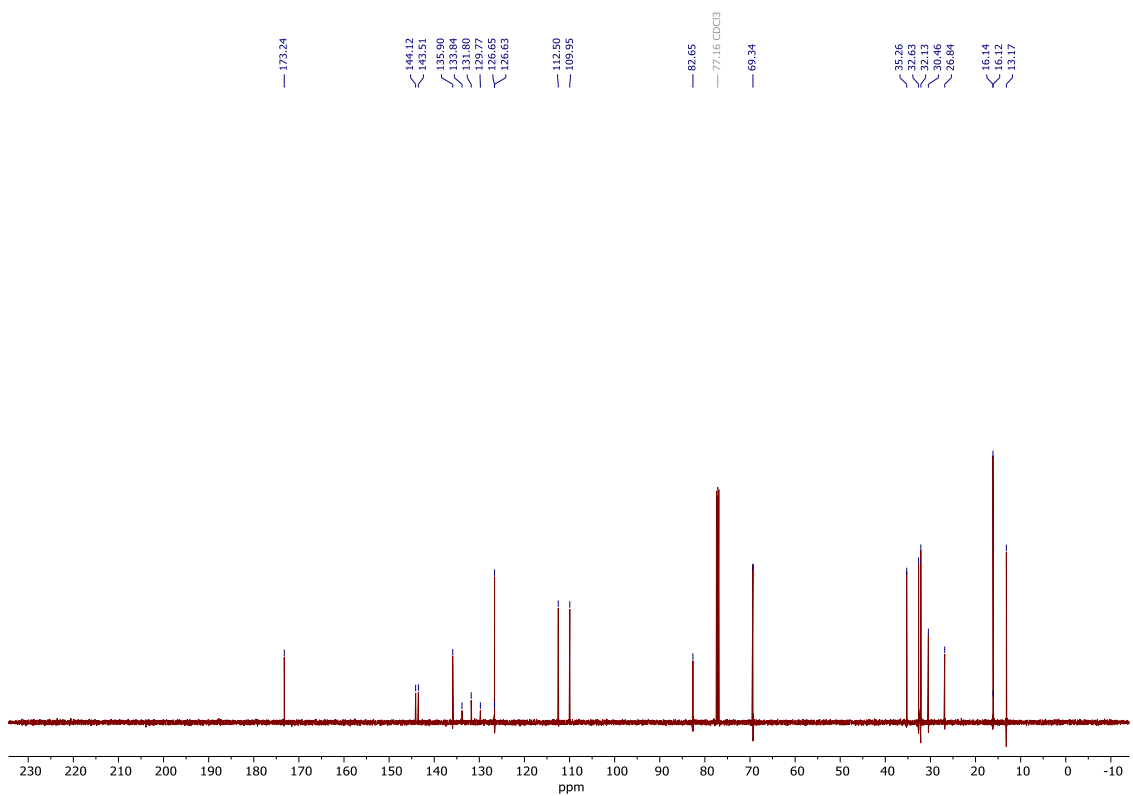

<sup>1</sup>H NMR (CDCl<sub>3</sub>) FFF-30

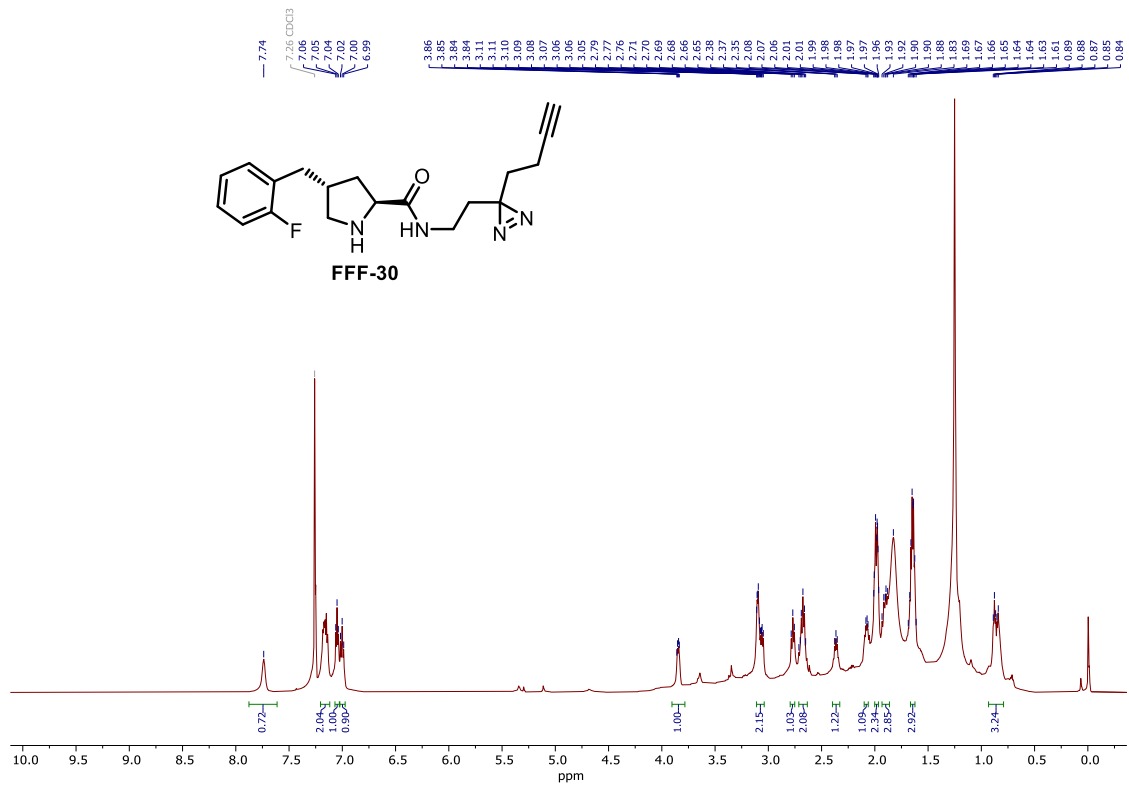

$^1\text{H NMR}$  (CDCl<sub>3</sub>) FFF-31

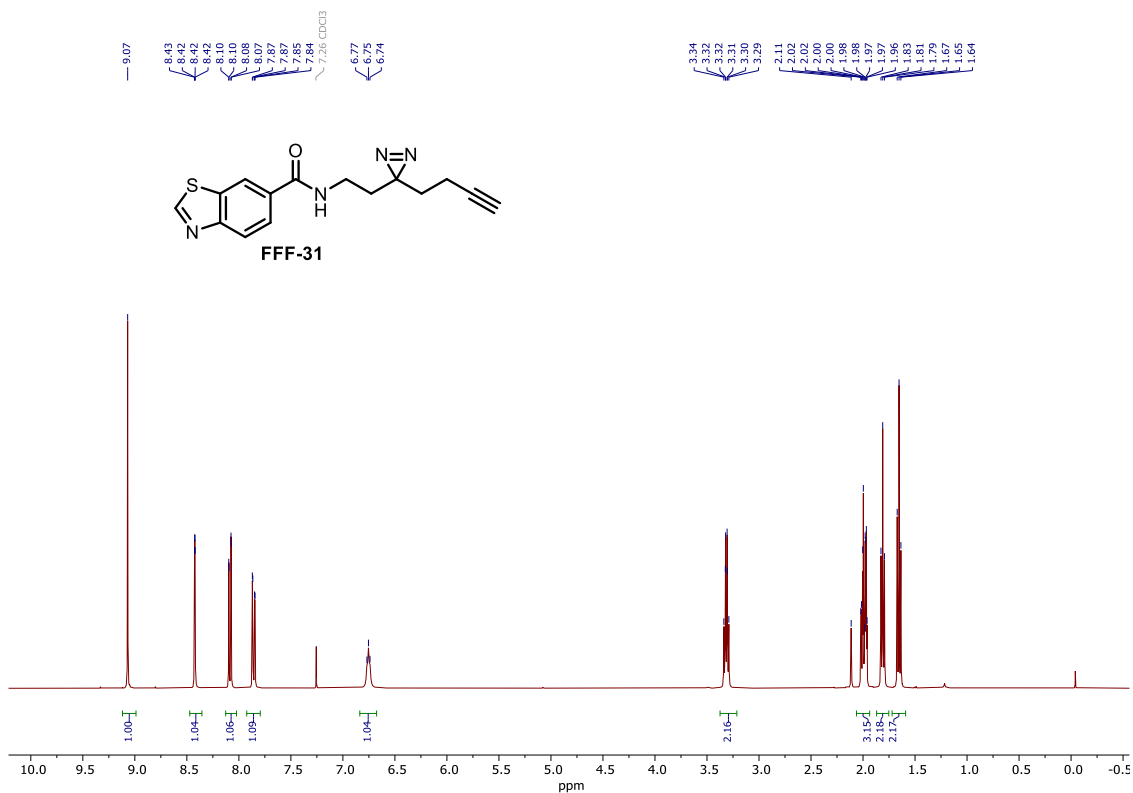

$^1\text{H NMR}$  (CDCl<sub>3</sub>) FFF-31



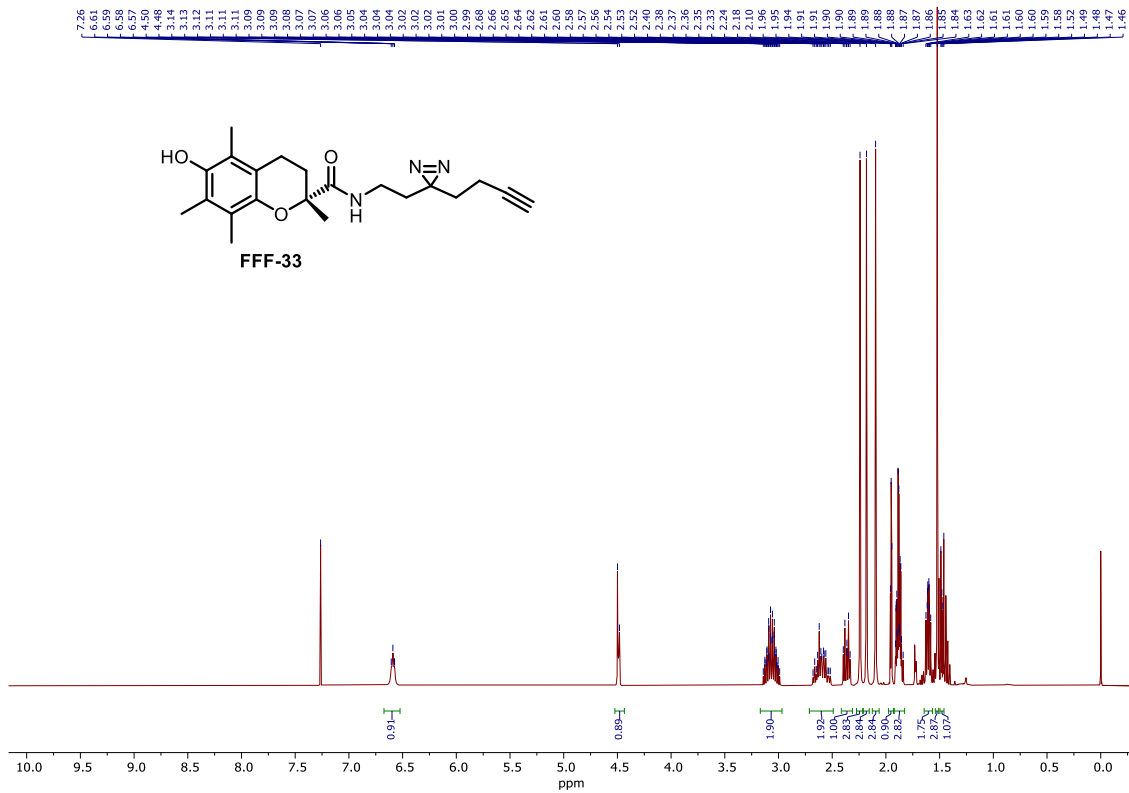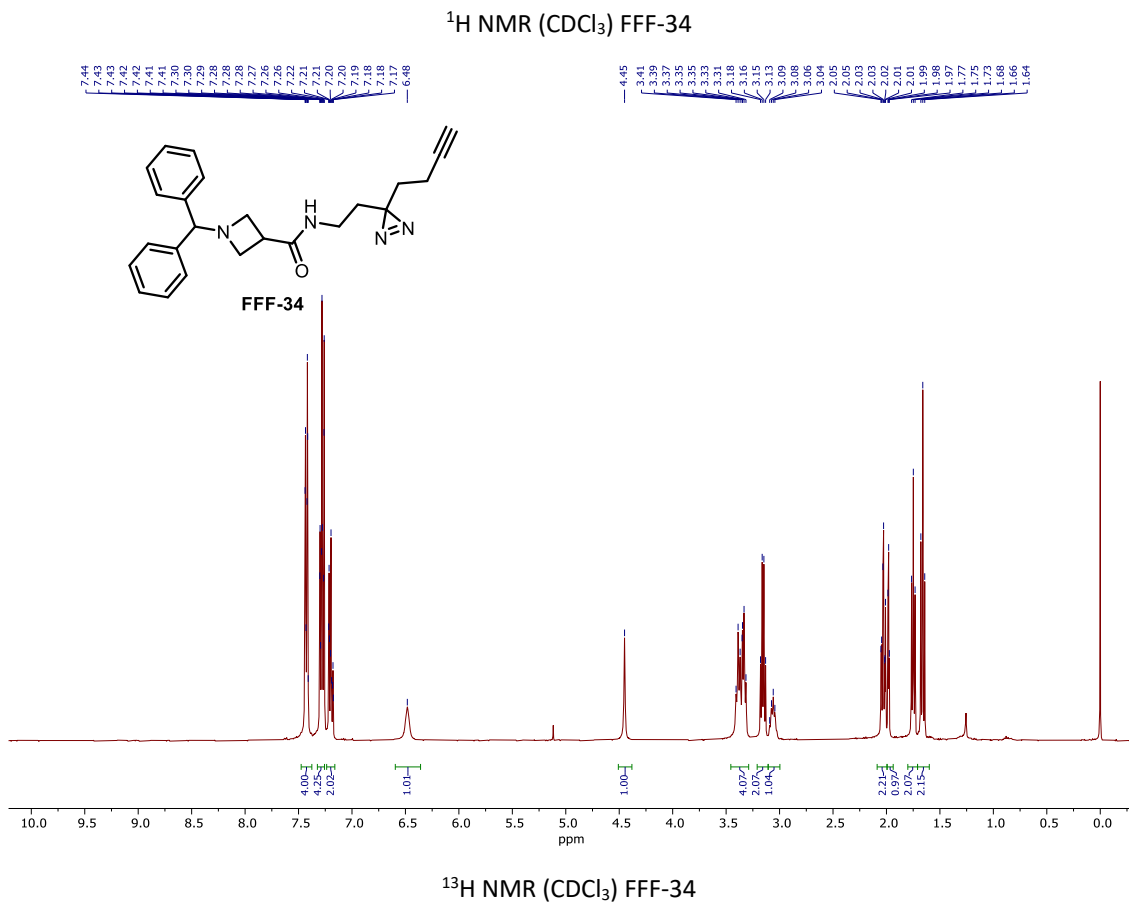

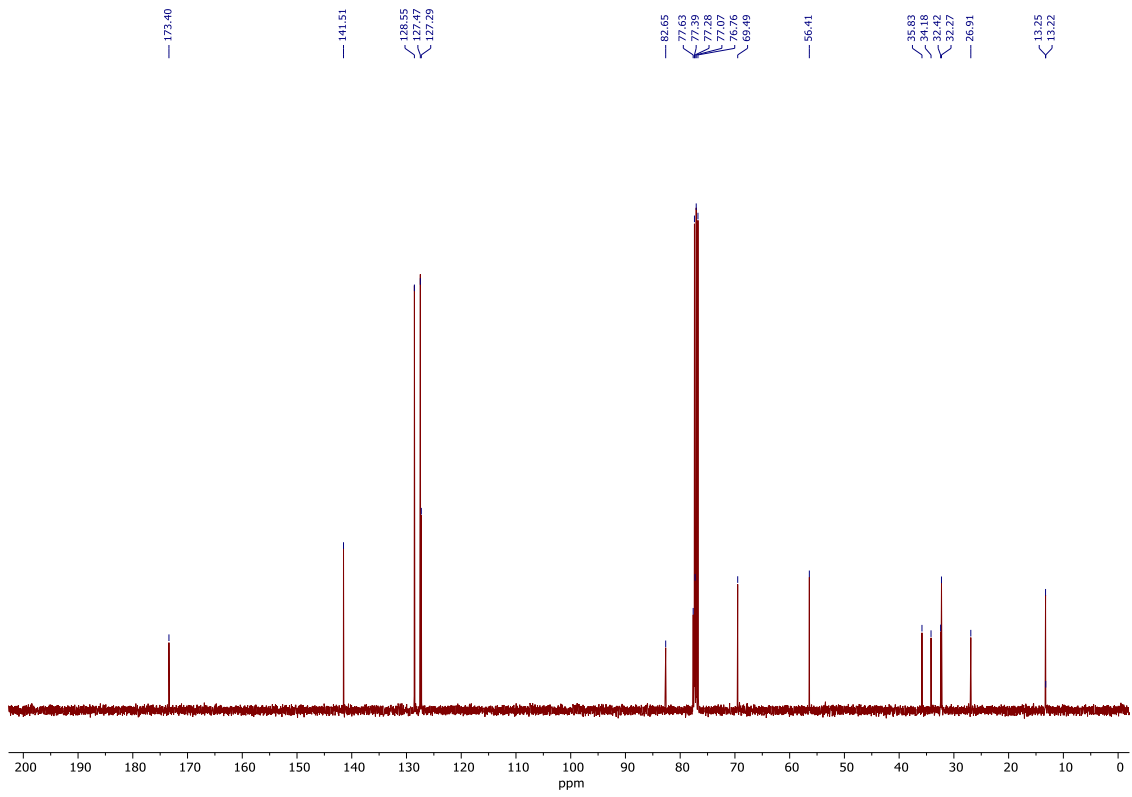

<sup>1</sup>H NMR (CDCl<sub>3</sub>) FFF-35

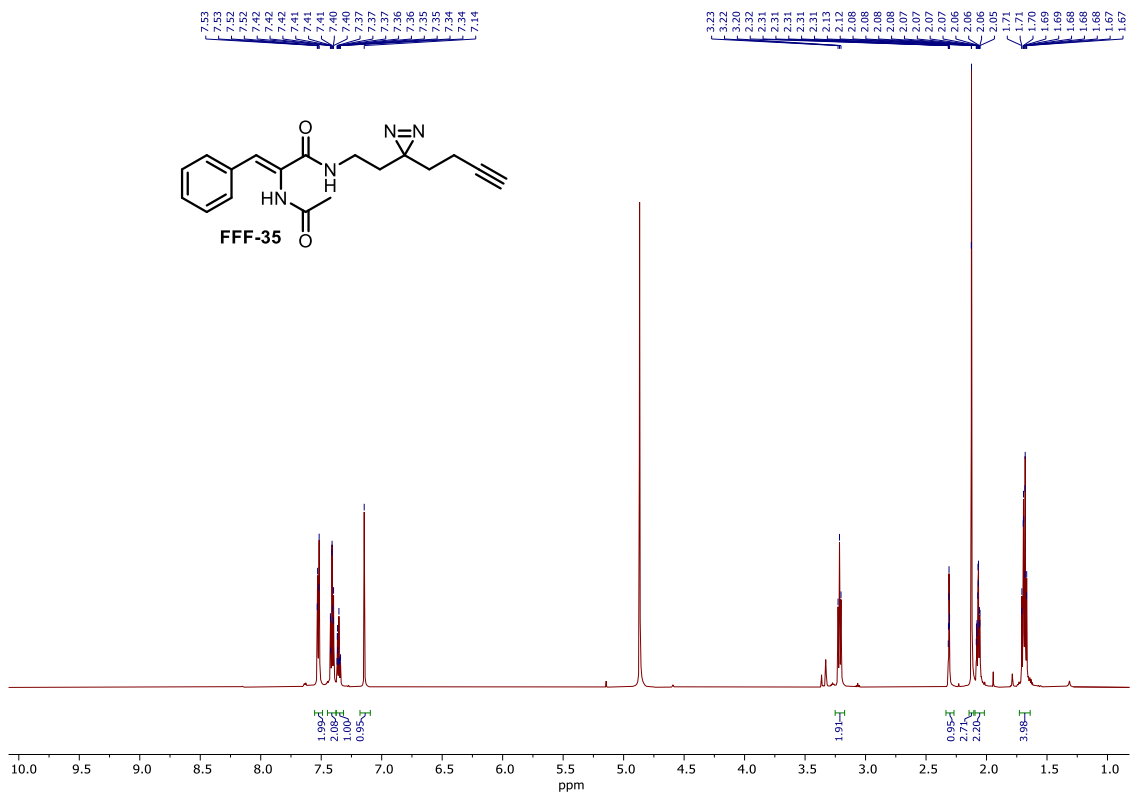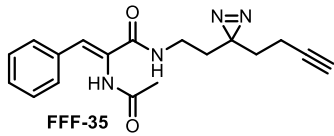

<sup>13</sup>C NMR (CDCl<sub>3</sub>) FFF-35



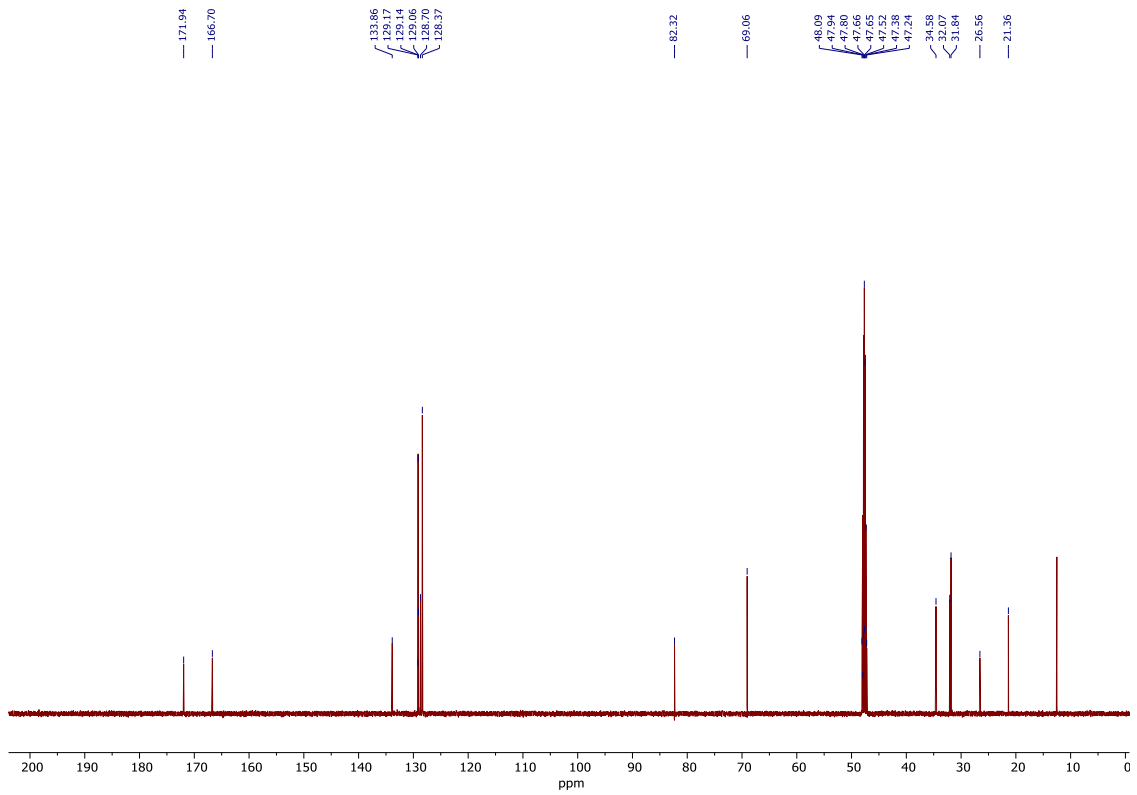

<sup>1</sup>H NMR (CDCl<sub>3</sub>) FFF-36

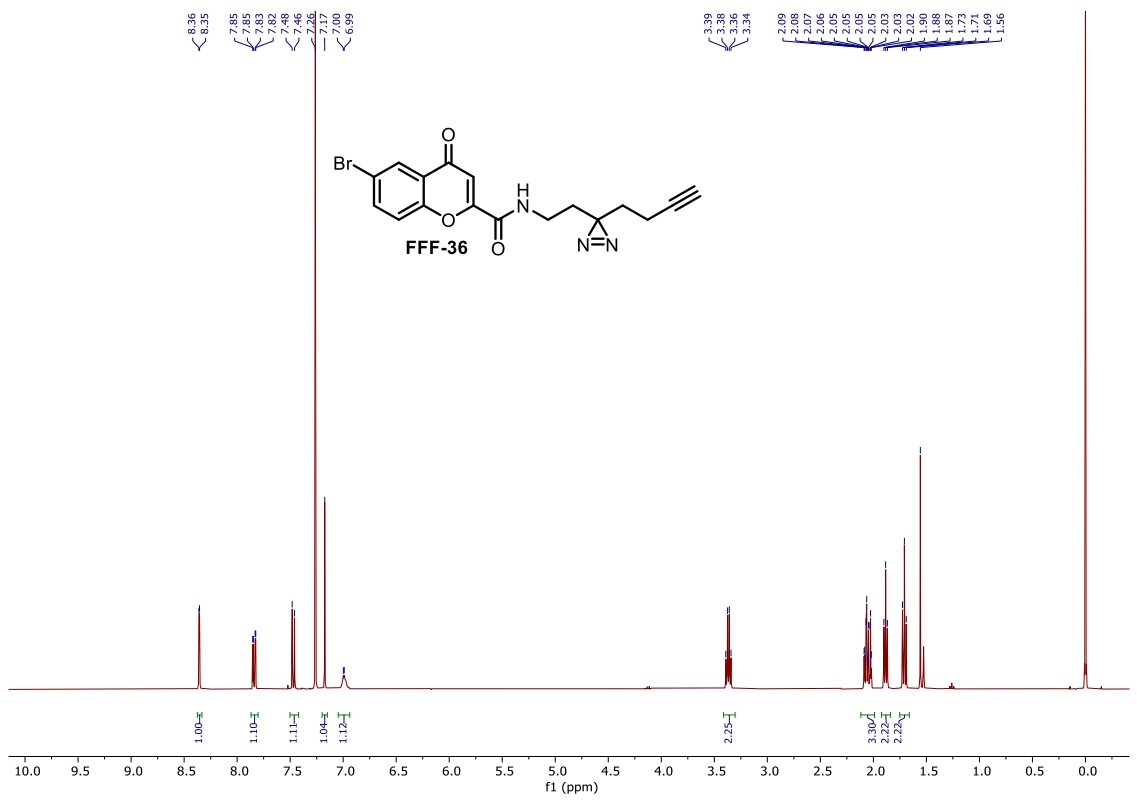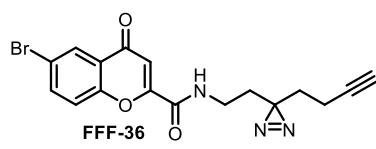

<sup>1</sup>H NMR (CDCl<sub>3</sub>) FFF-39



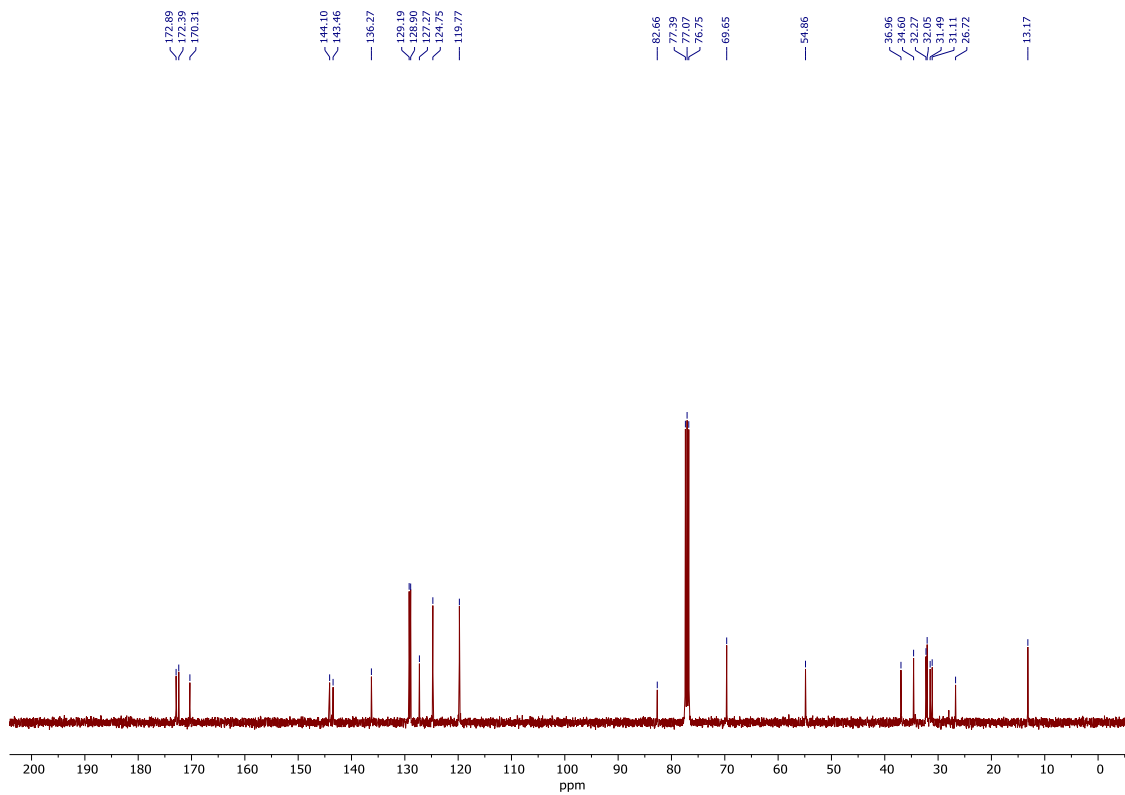

<sup>1</sup>H NMR (DMSO-d<sub>6</sub>) S1

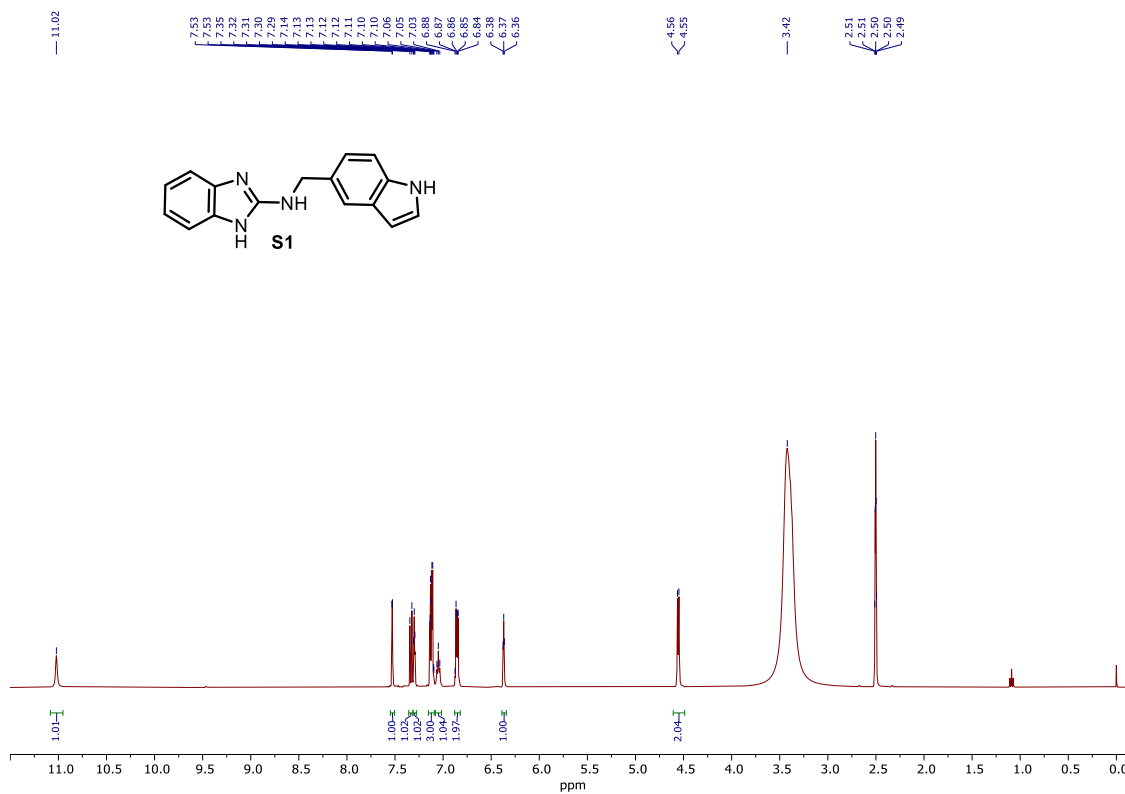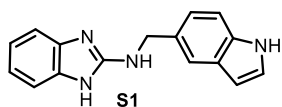

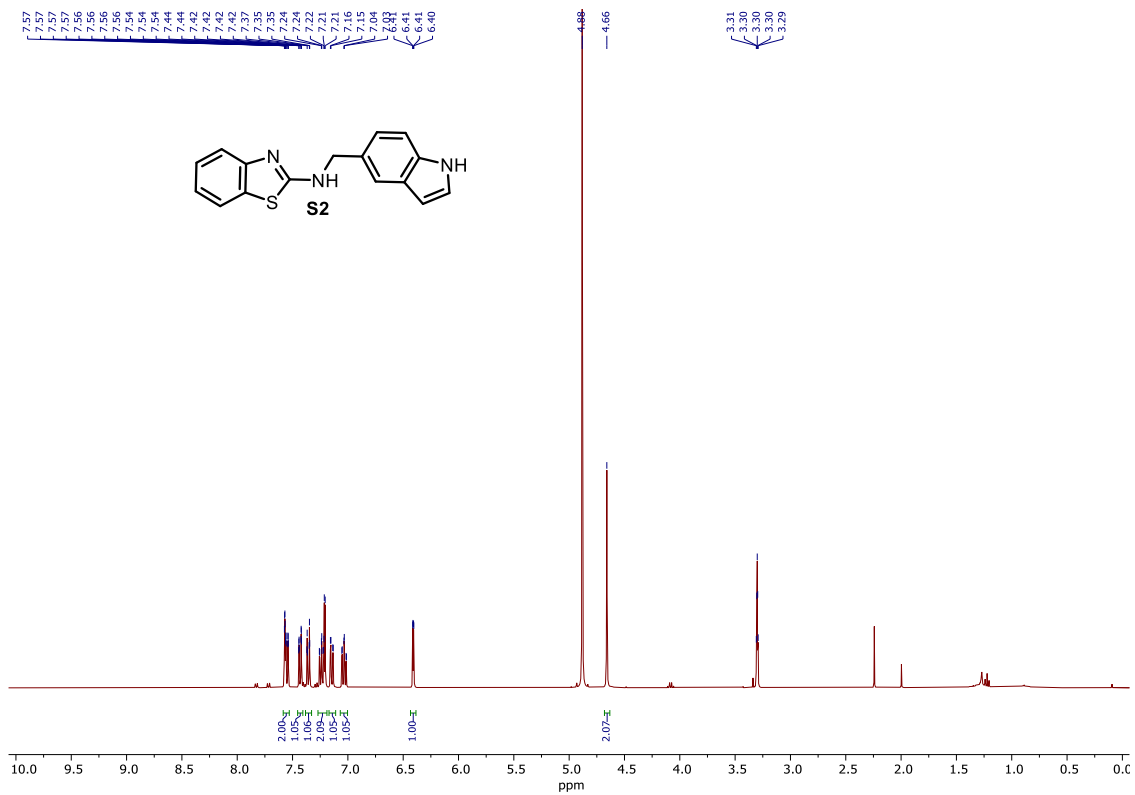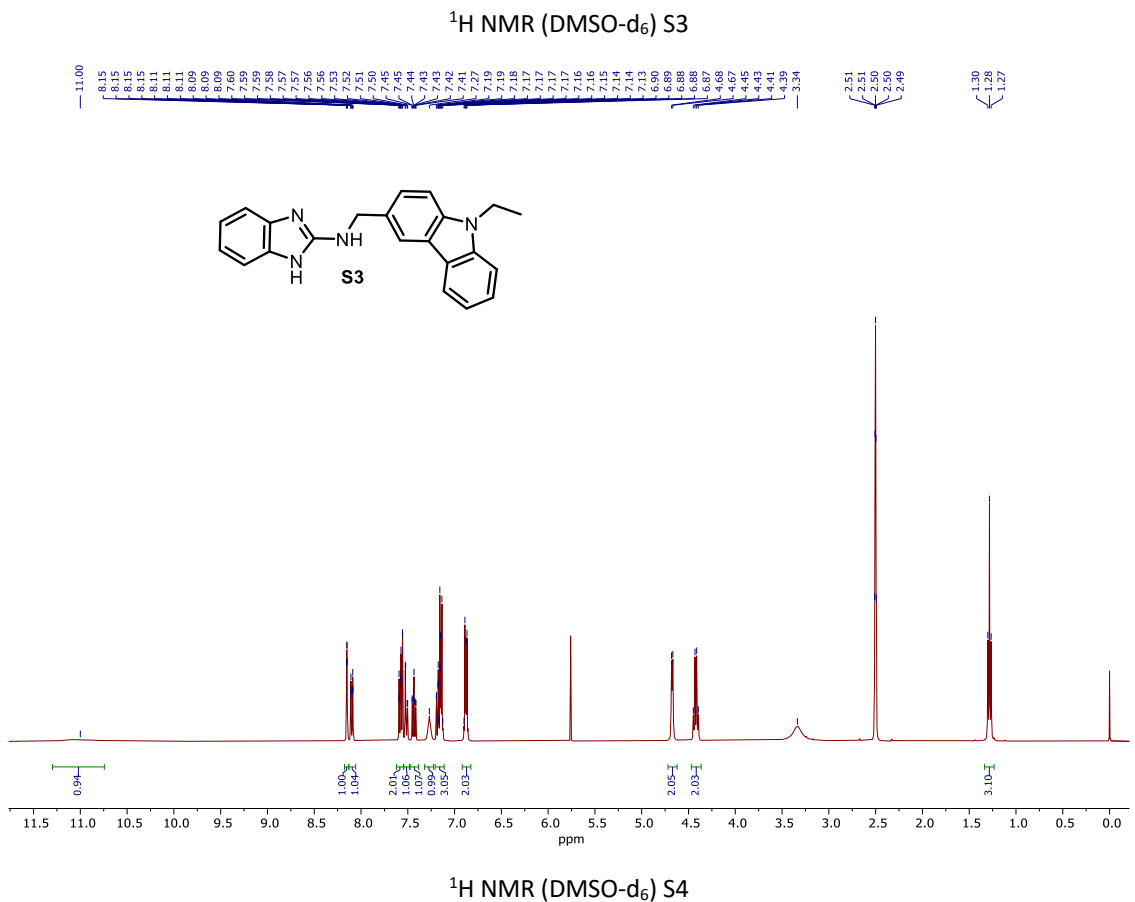

7.58  
7.48  
7.46  
7.40  
7.38  
7.30  
7.29  
7.28  
7.24  
7.23  
7.22  
7.20  
7.17  
7.16  
7.15  
7.14  
6.90  
6.89  
6.46  
5.40  
4.59

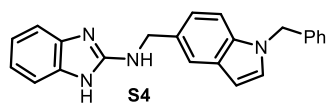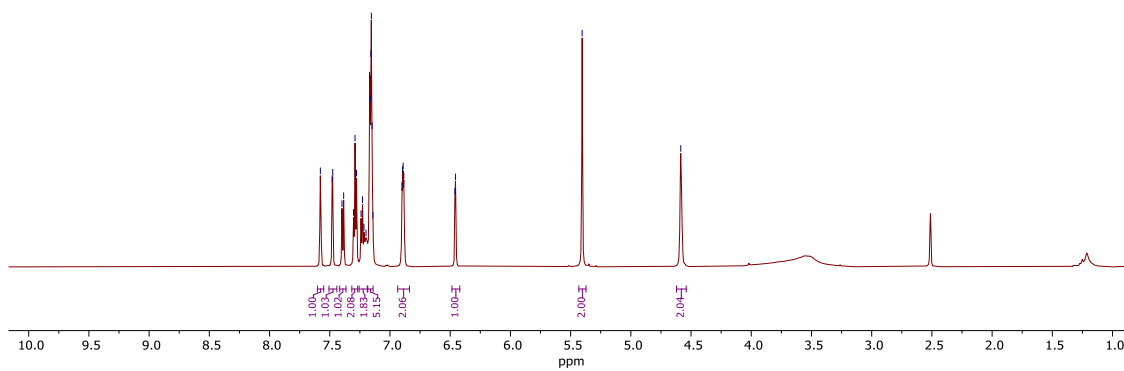

<sup>13</sup>C NMR (DMSO-d<sub>6</sub>) S4

155.74  
138.80  
135.49  
133.66  
129.91  
128.97  
128.72  
127.74  
127.25  
121.26  
119.77  
119.59  
112.05  
110.47  
101.37  
49.63  
46.68  
40.40  
40.22  
39.94  
39.84  
39.71  
39.57

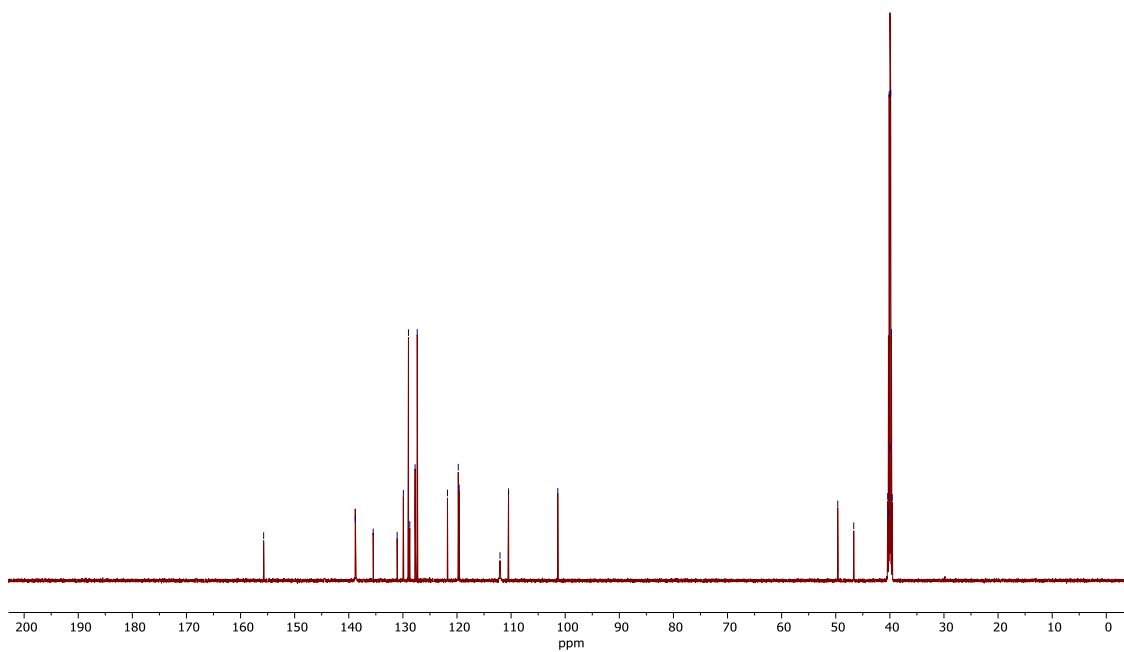

<sup>1</sup>H NMR (CDCl<sub>3</sub>) S5

8.54  
8.54  
8.53  
8.53  
8.16  
8.14  
8.14  
8.13  
8.12  
8.12  
8.11  
8.01  
8.00  
7.99  
7.98  
7.98  
7.63  
7.63  
7.62  
7.62  
7.61  
7.54  
7.54  
7.53  
7.52  
7.52  
7.52  
7.51  
7.50  
7.50  
7.46  
7.46  
7.45  
7.45  
7.44  
7.44  
7.42  
7.42  
7.41  
7.30  
7.30  
7.29  
7.29  
7.28  
7.28  
7.27  
7.27  
7.27  
7.26  
7.26  
7.25  
7.25  
7.14  
7.14  
7.13  
7.13  
4.89  
4.89  
4.57  
4.47  
4.47  
4.41  
4.41  
4.40  
4.39  
4.39  
4.36  
4.36  
1.48  
1.47  
1.46  
1.46  
1.44  
1.44

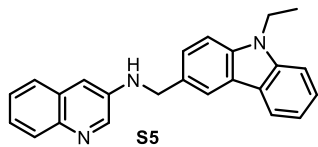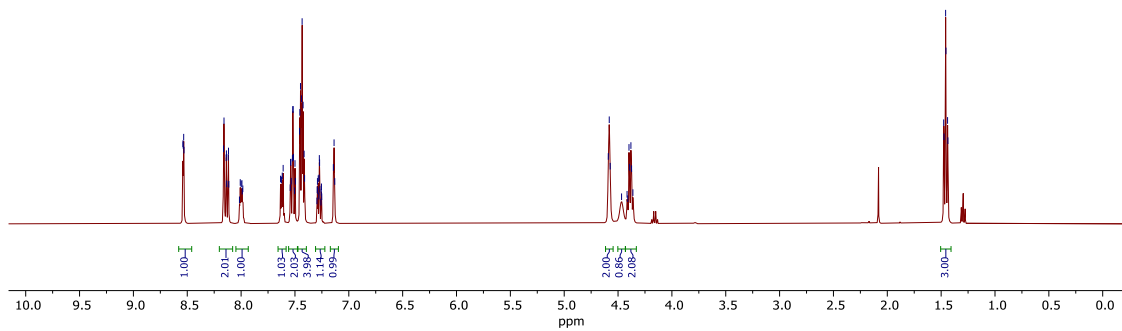

<sup>13</sup>C NMR (CDCl<sub>3</sub>) S5

143.46  
143.45  
142.18  
141.63  
140.84  
139.53  
129.57  
129.03  
128.48  
128.46  
126.91  
126.07  
125.92  
125.56  
125.52  
124.82  
123.26  
122.65  
120.52  
119.76  
118.57  
110.38  
108.76  
108.62

77.41  
77.09  
76.77

48.53

37.64

13.84

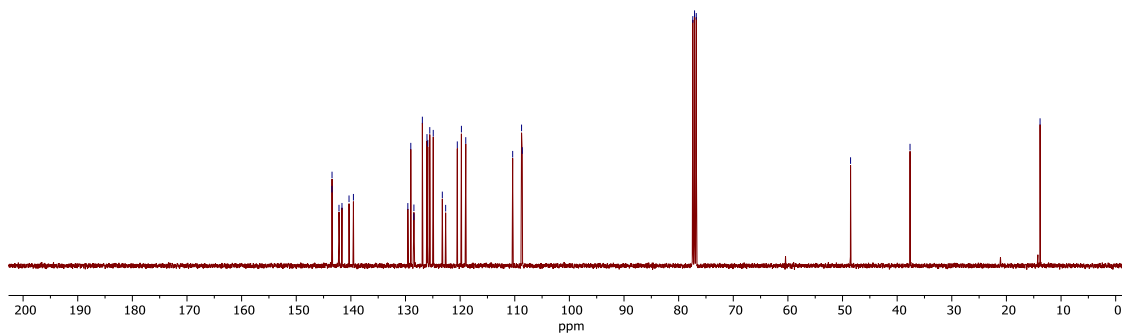

<sup>1</sup>H NMR (CDCl<sub>3</sub>) S6

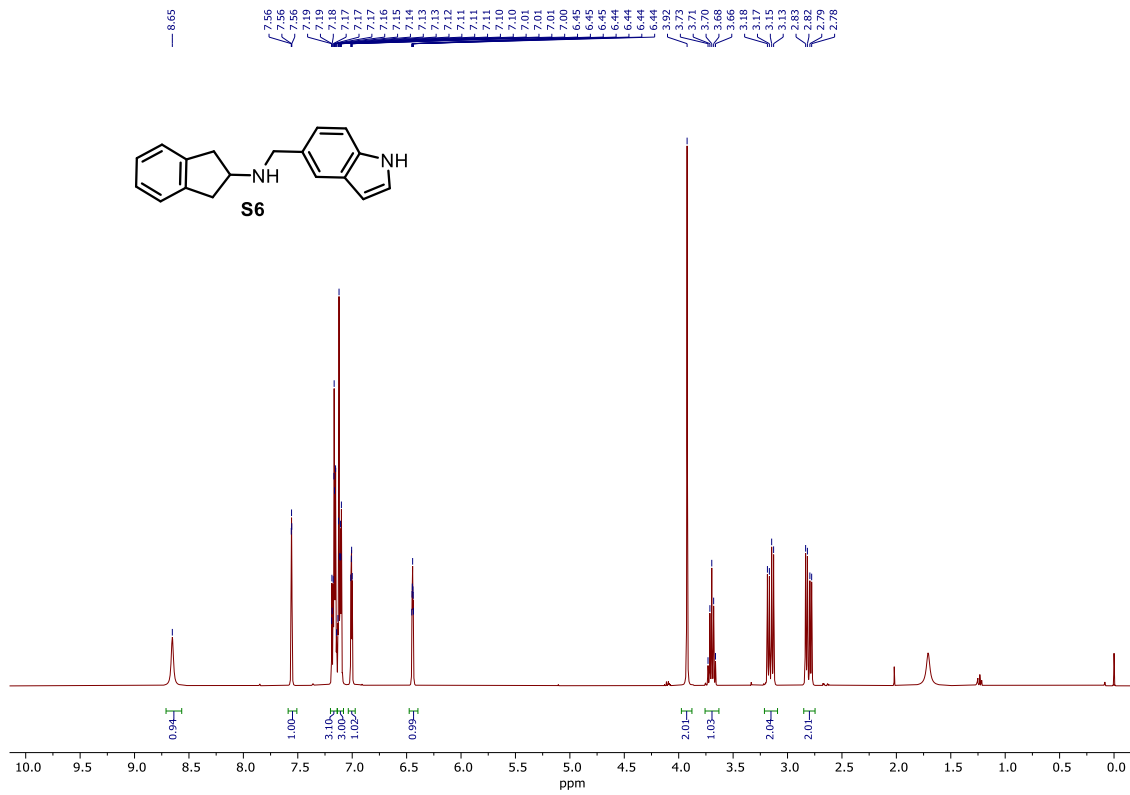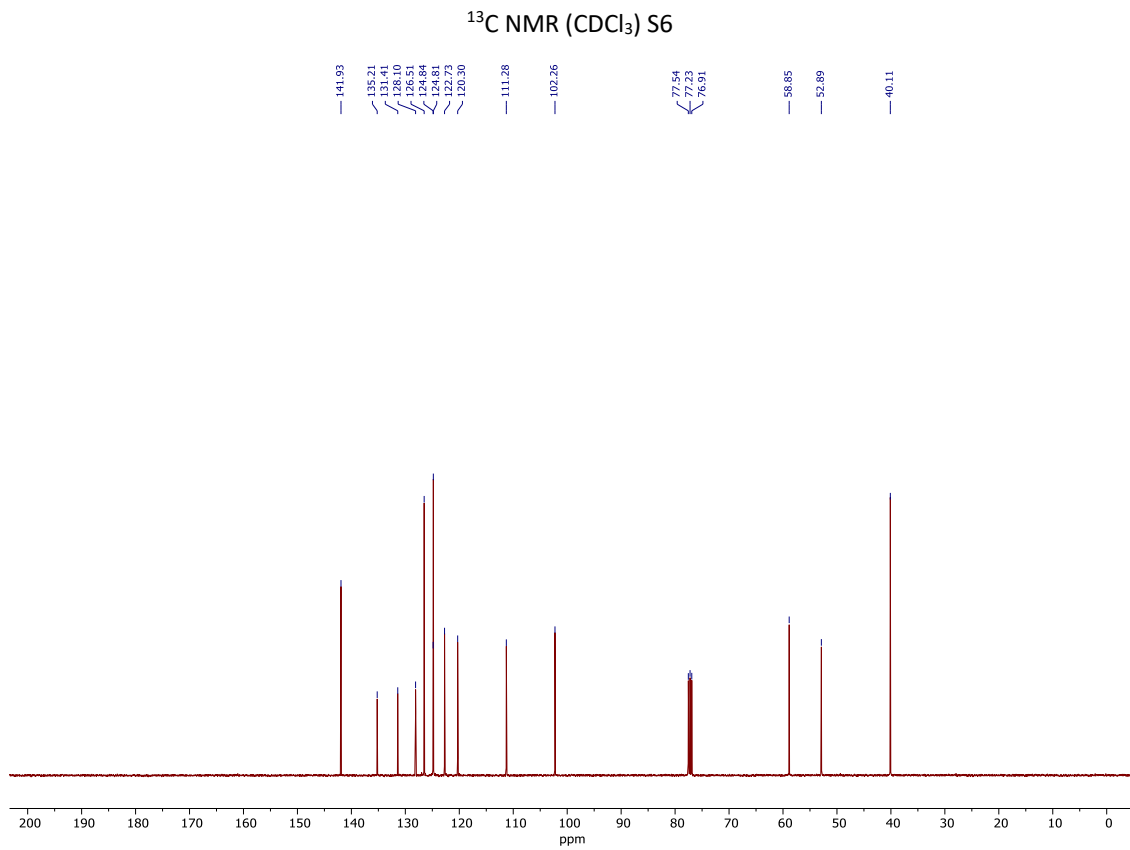

**<sup>1</sup>H NMR (CD<sub>3</sub>OD) S7**

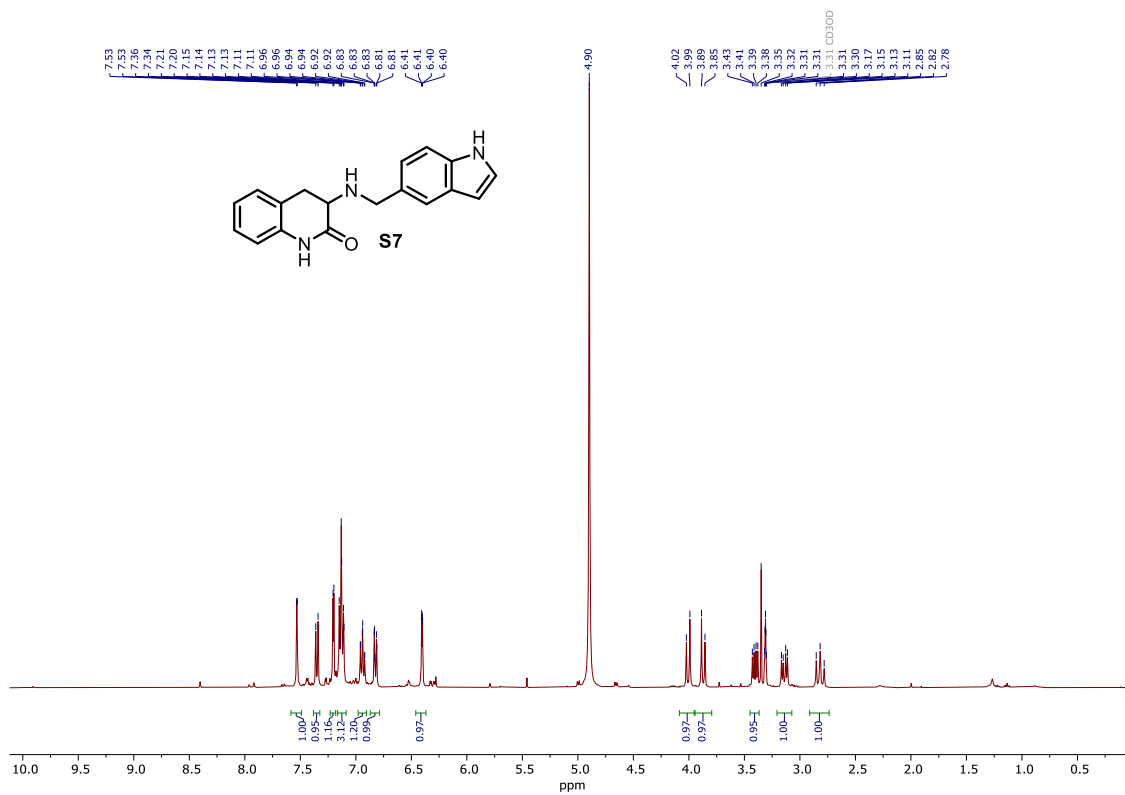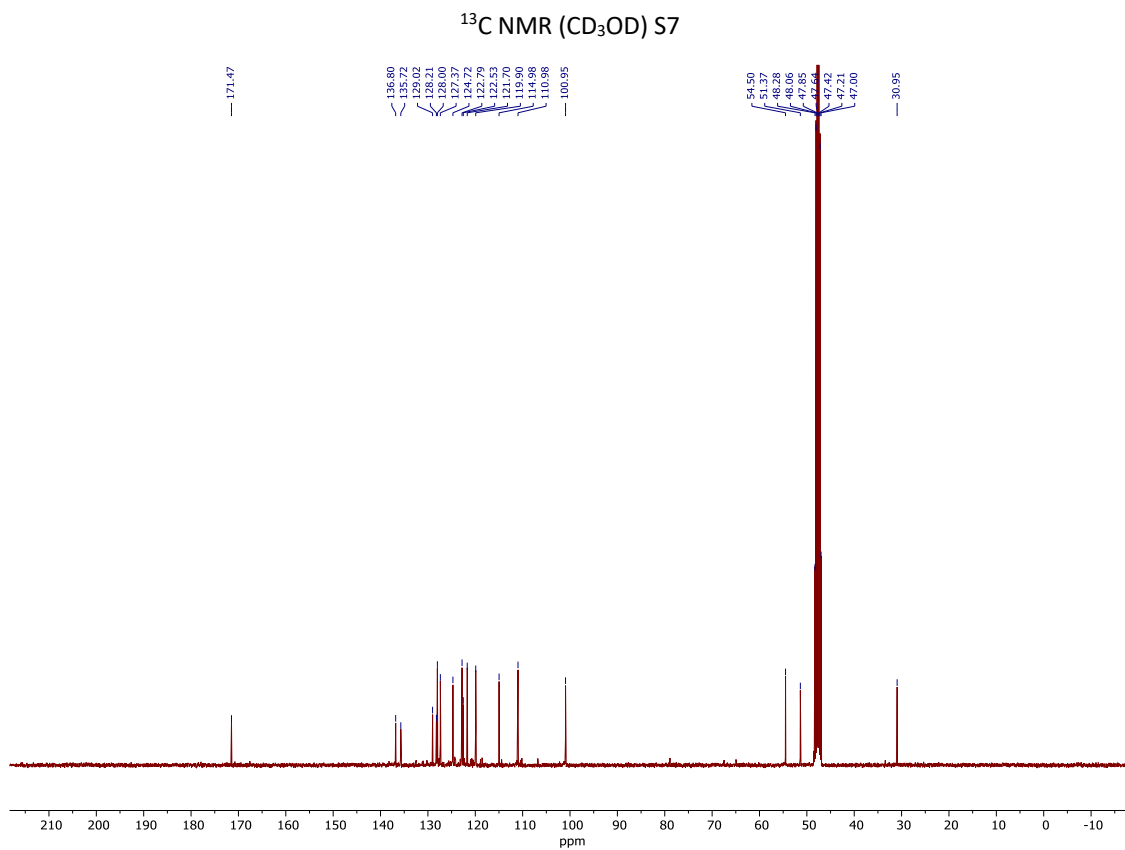

**<sup>1</sup>H NMR (CDCl<sub>3</sub>) S8**



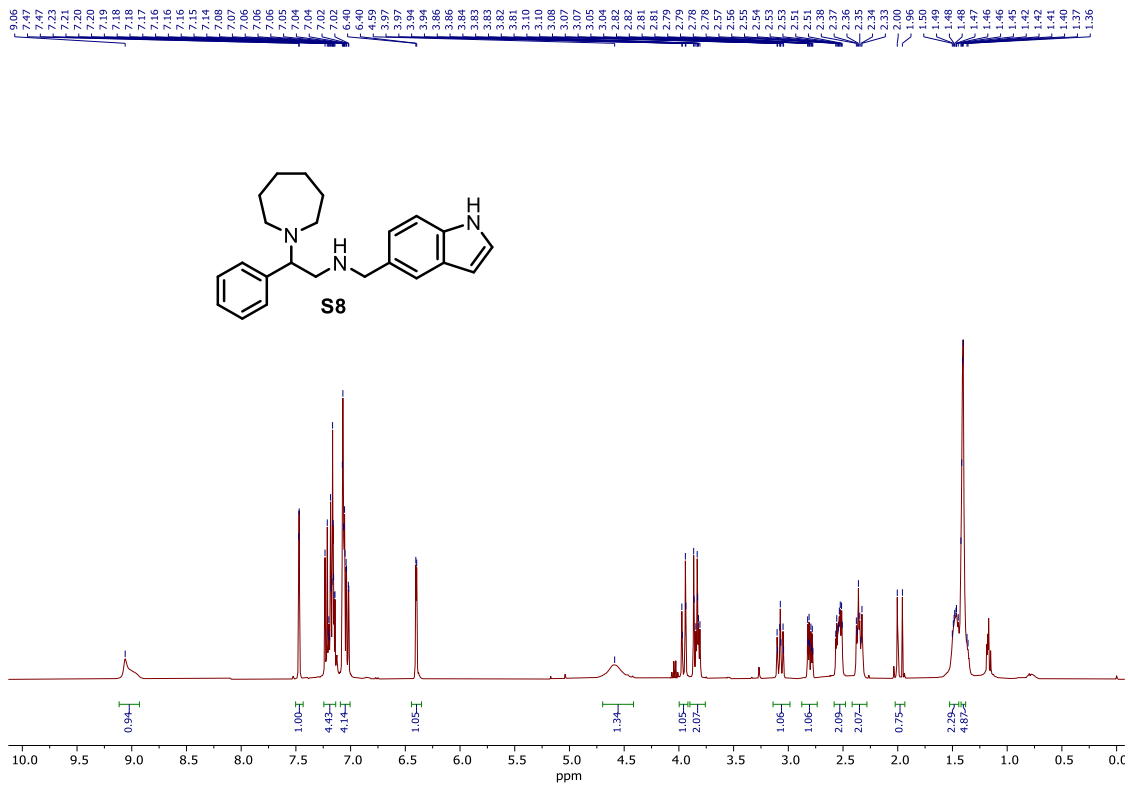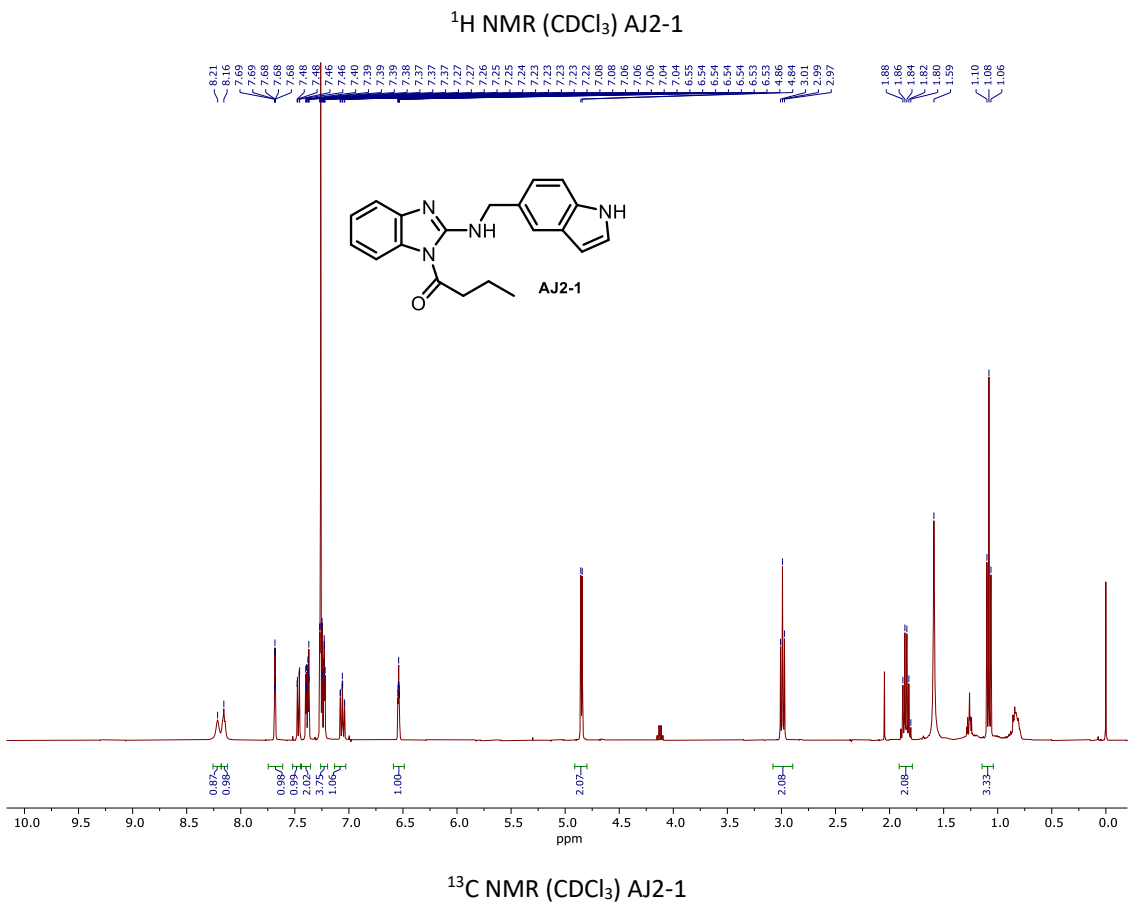

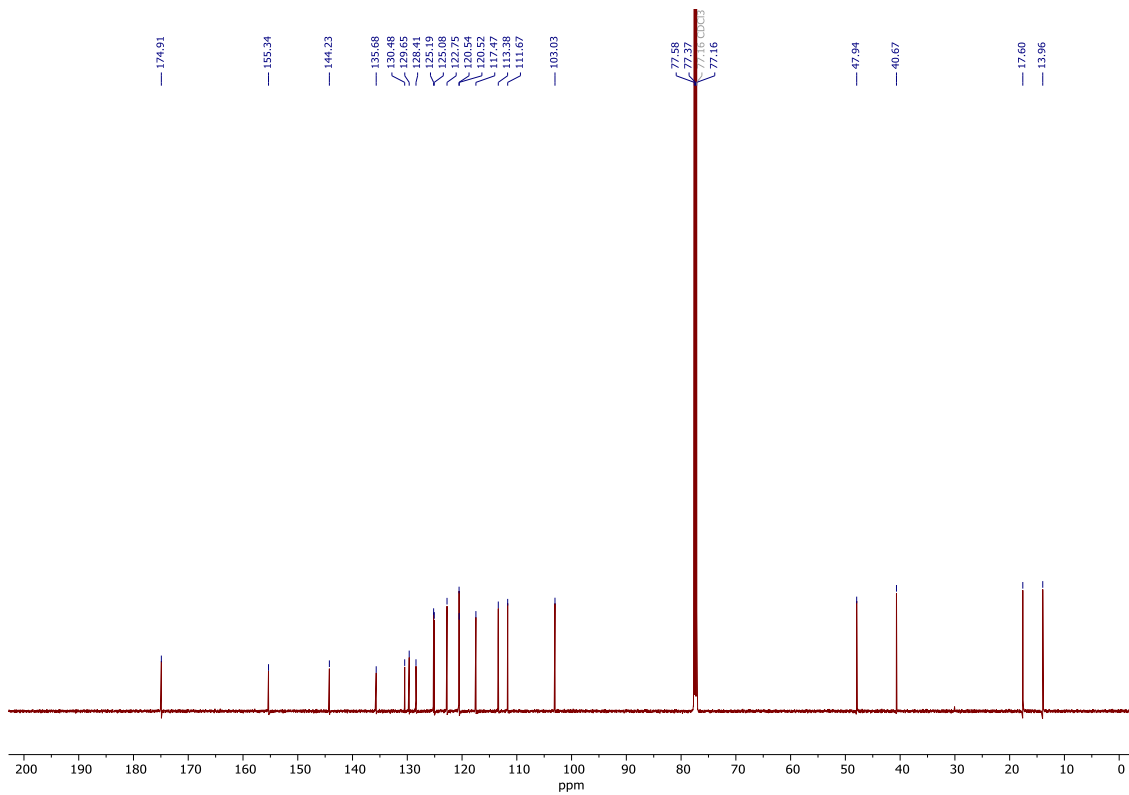

<sup>1</sup>H NMR (CDCl<sub>3</sub>) AJ2-2

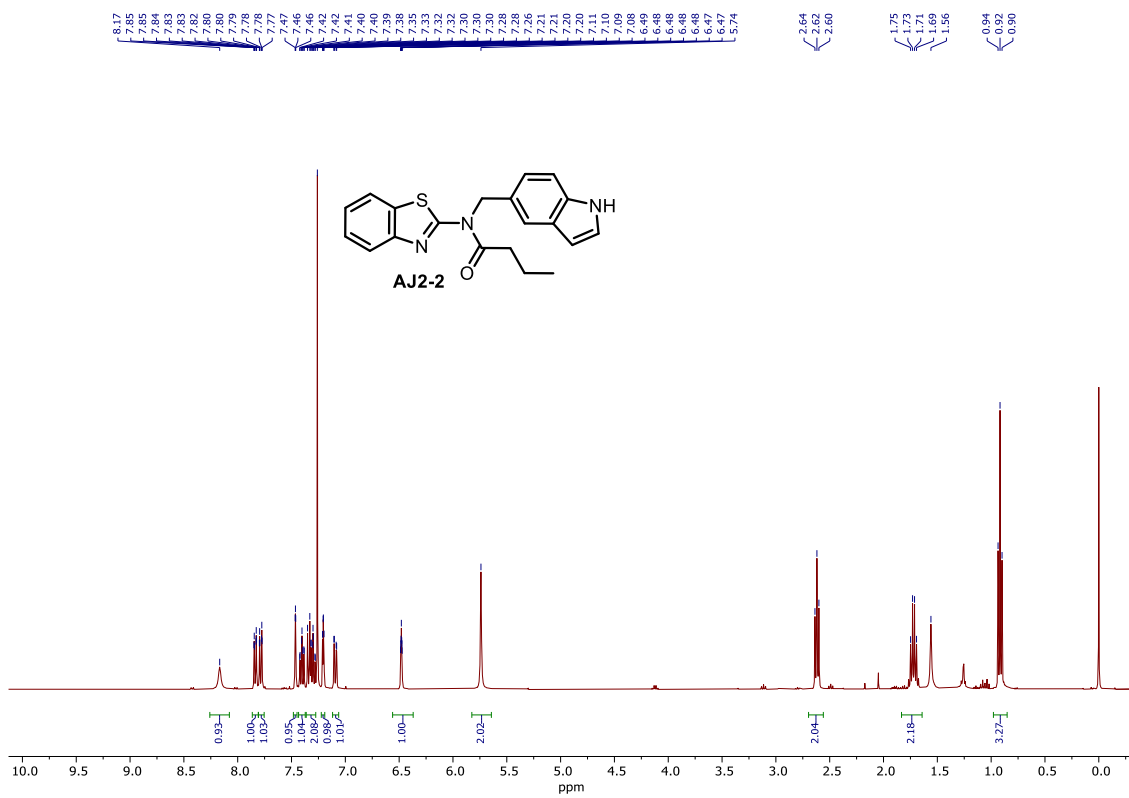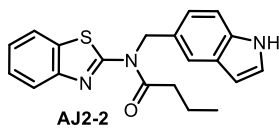

<sup>13</sup>C NMR (CDCl<sub>3</sub>) AJ2-2

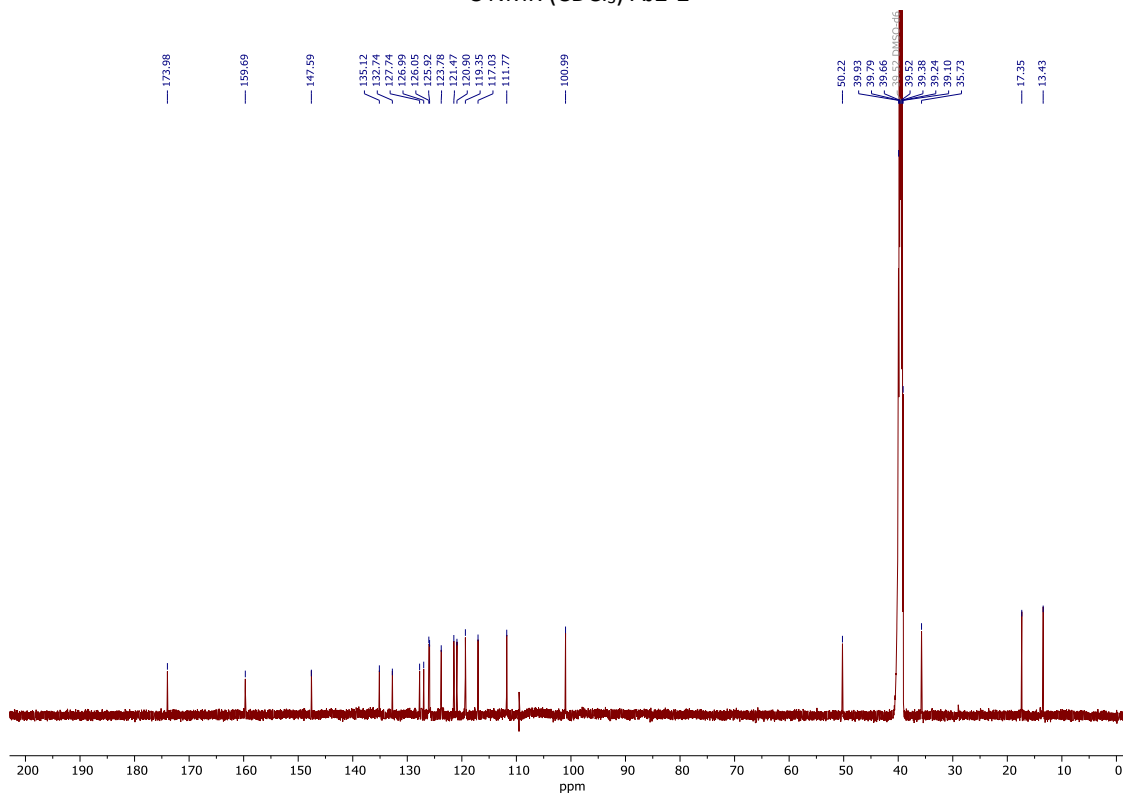

<sup>1</sup>H NMR (CDCl<sub>3</sub>) AJ2-3A

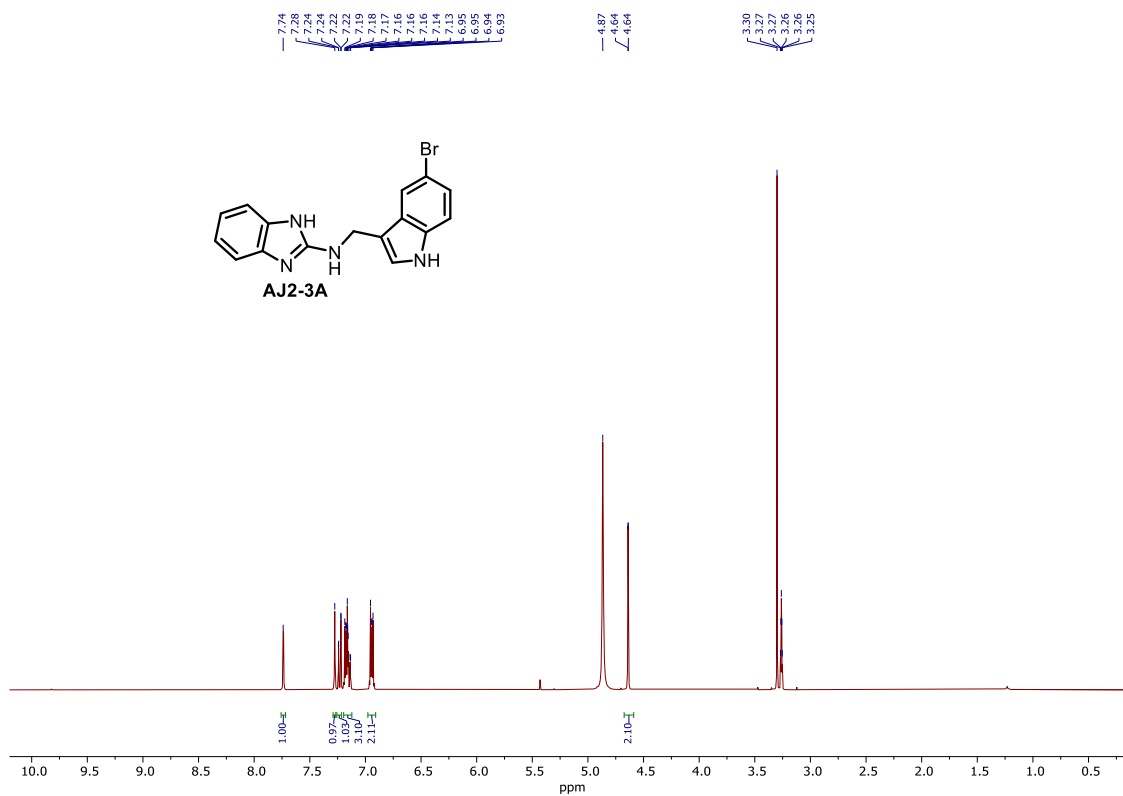

<sup>13</sup>C NMR (CDCl<sub>3</sub>) AJ2-3A

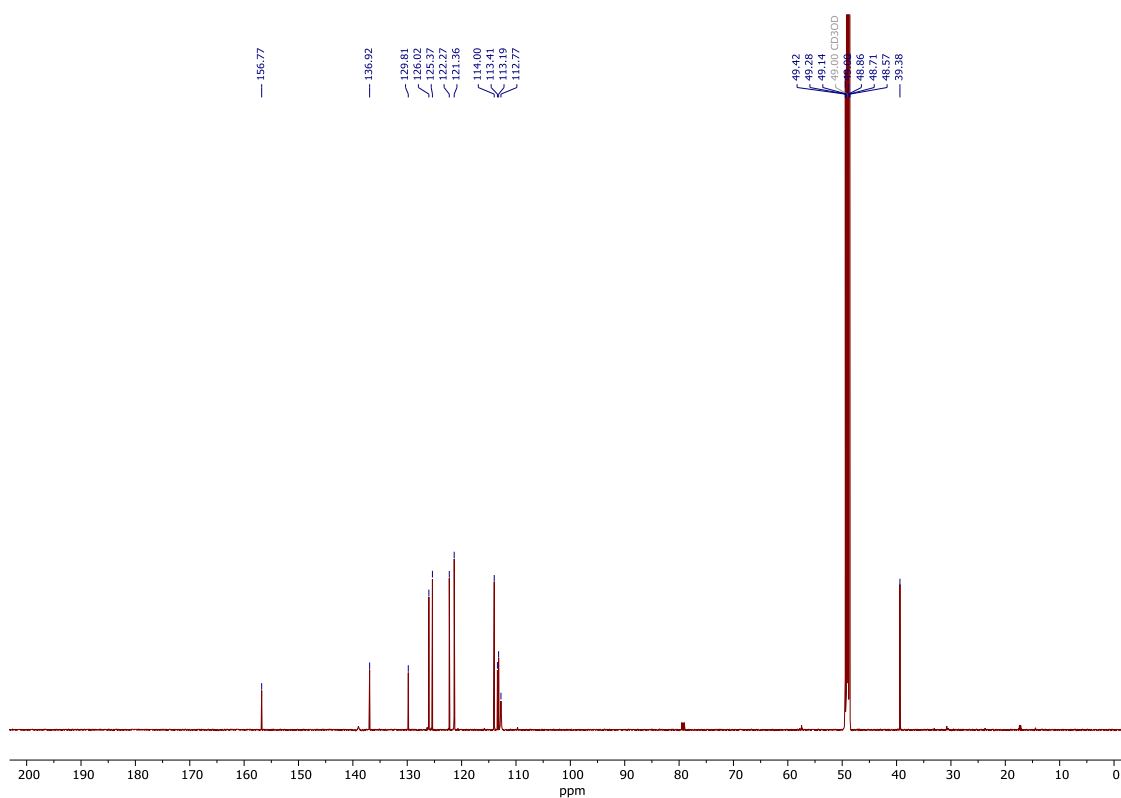

<sup>1</sup>H NMR (CD<sub>3</sub>OD) AJ2-4

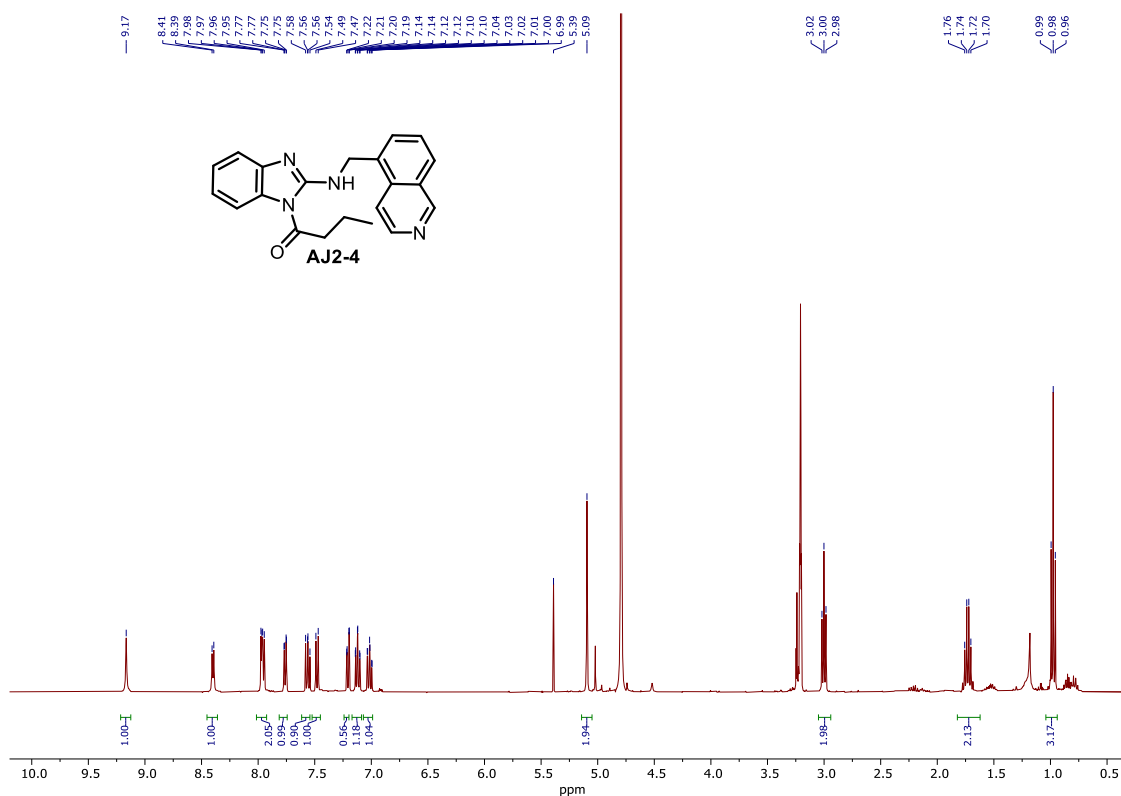

<sup>13</sup>C NMR (CDCl<sub>3</sub>) AJ2-4

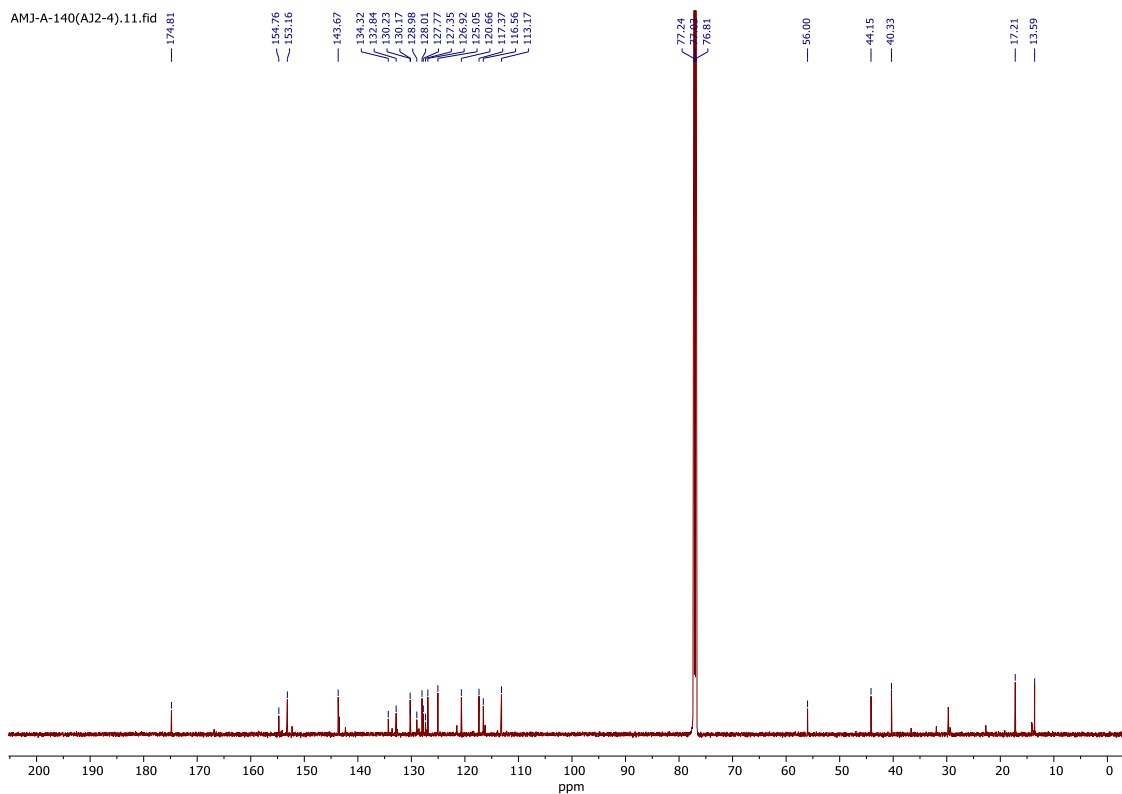

<sup>1</sup>H NMR (CDCl<sub>3</sub>) AJ2-5

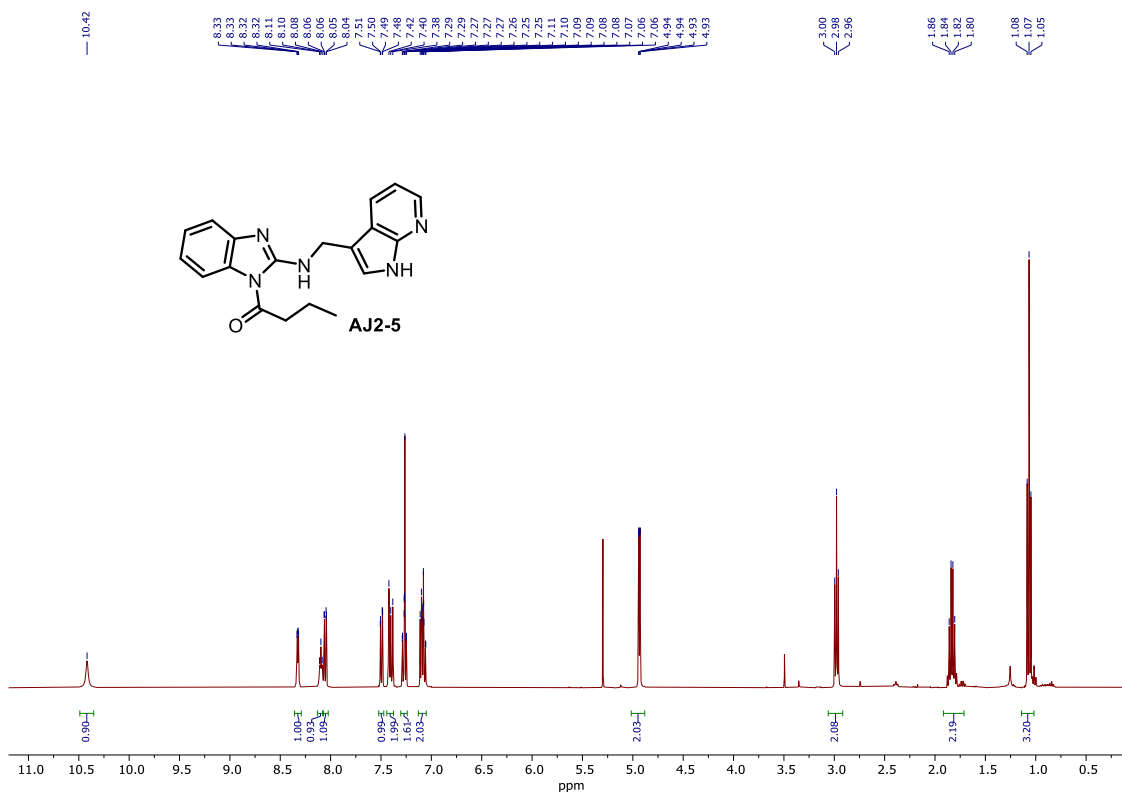

<sup>13</sup>C NMR (CDCl<sub>3</sub>) AJ2-5

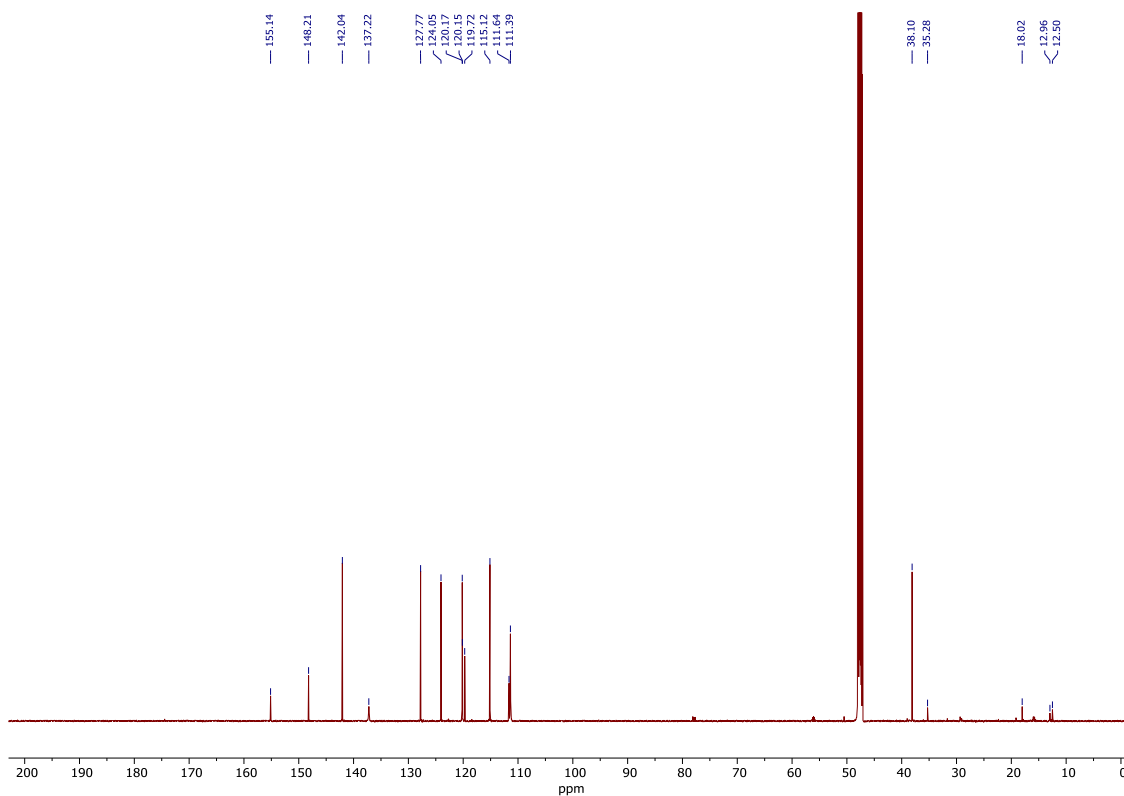

<sup>1</sup>H NMR (CDCl<sub>3</sub>) AJ2-6

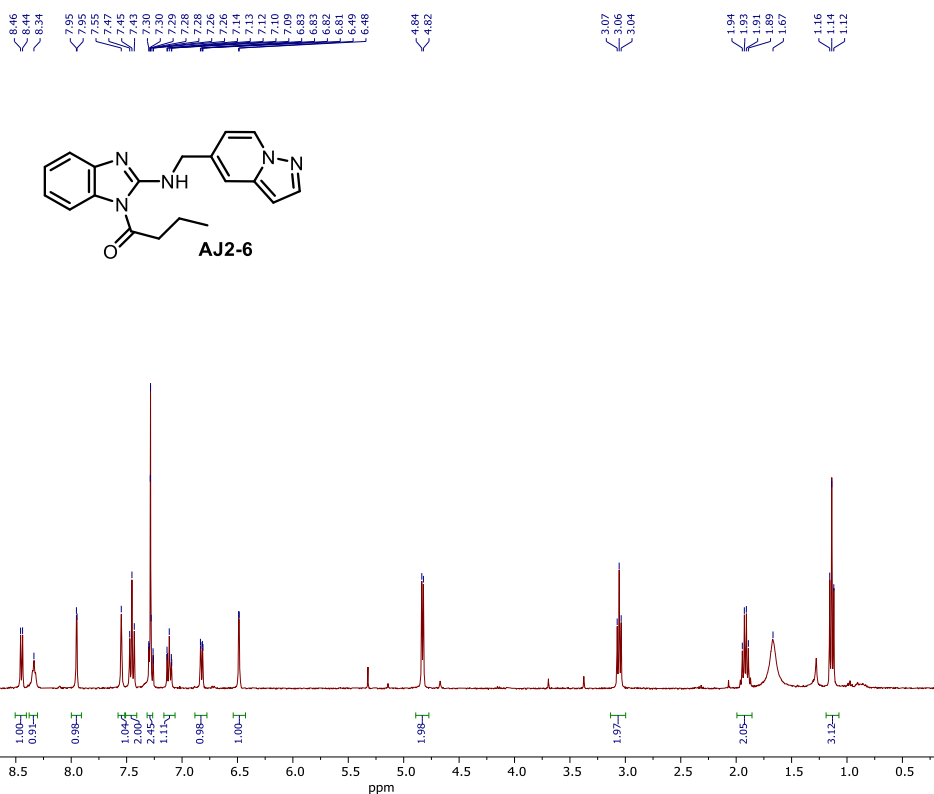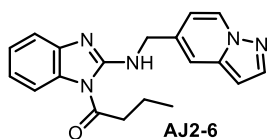



<sup>13</sup>C NMR (CDCl<sub>3</sub>) AJ2-7

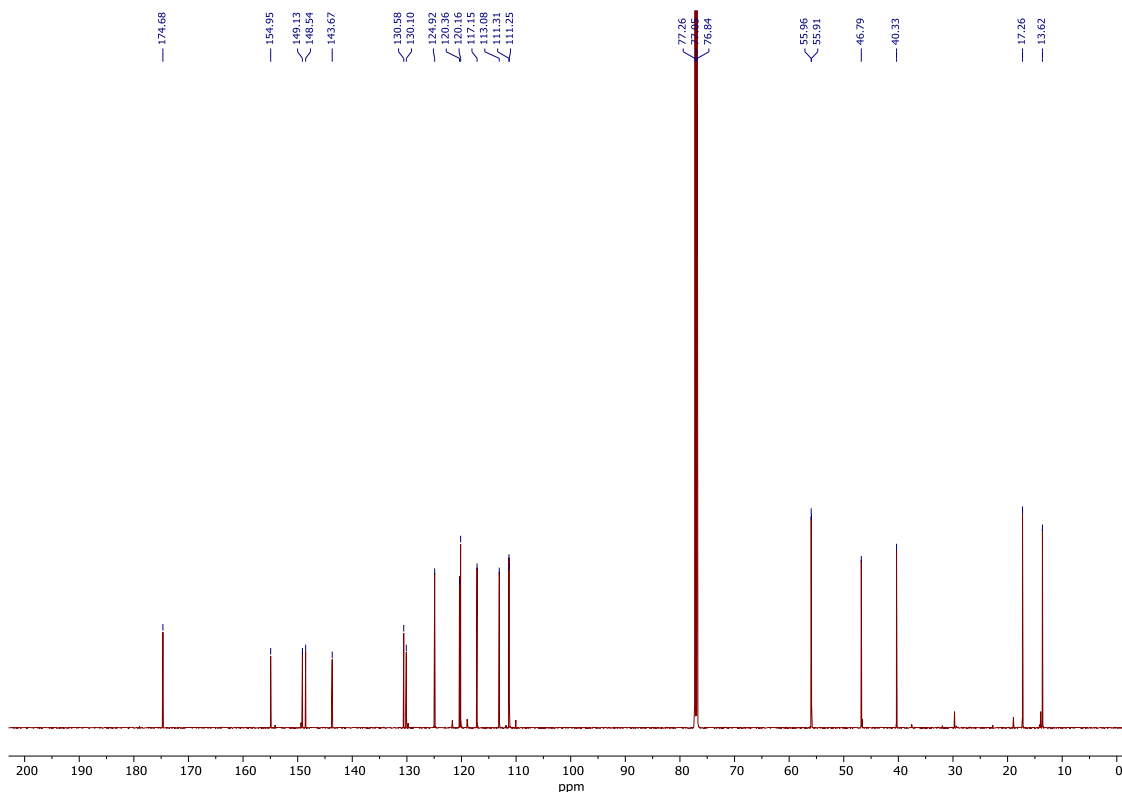

<sup>1</sup>H NMR (CDCl<sub>3</sub>) AJ2-8

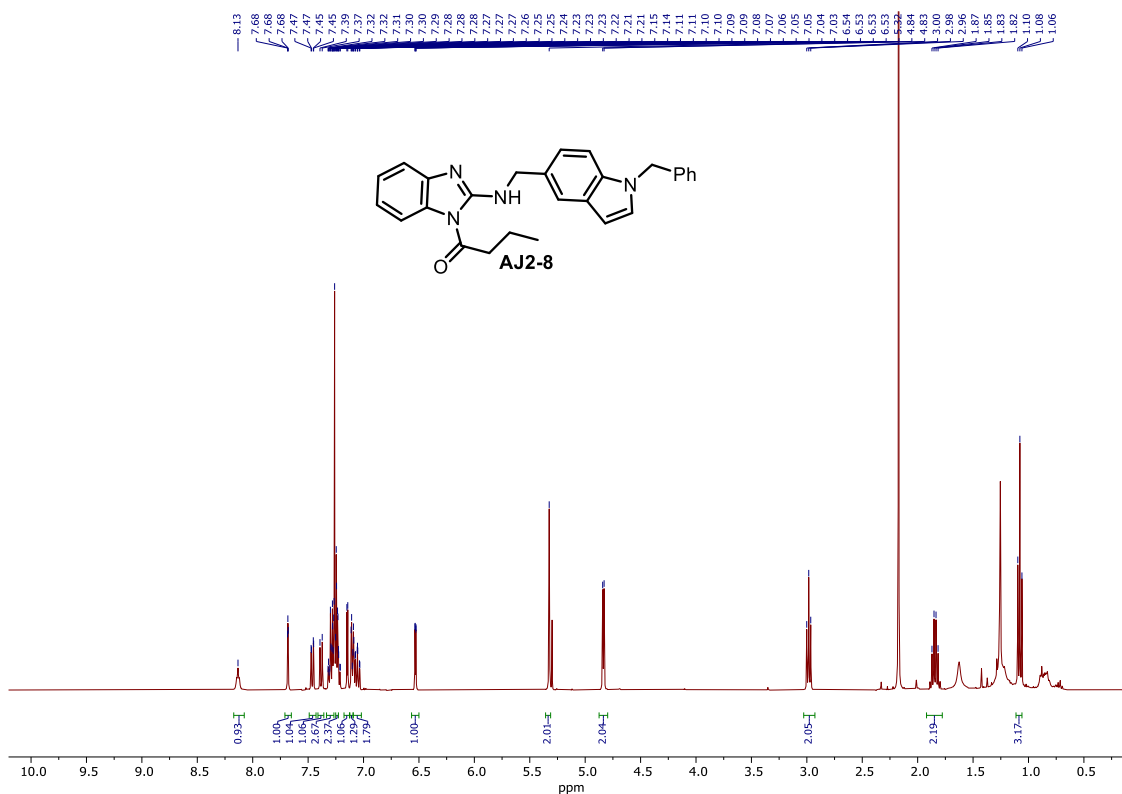



<sup>13</sup>C NMR (CDCl<sub>3</sub>) AJ2-8

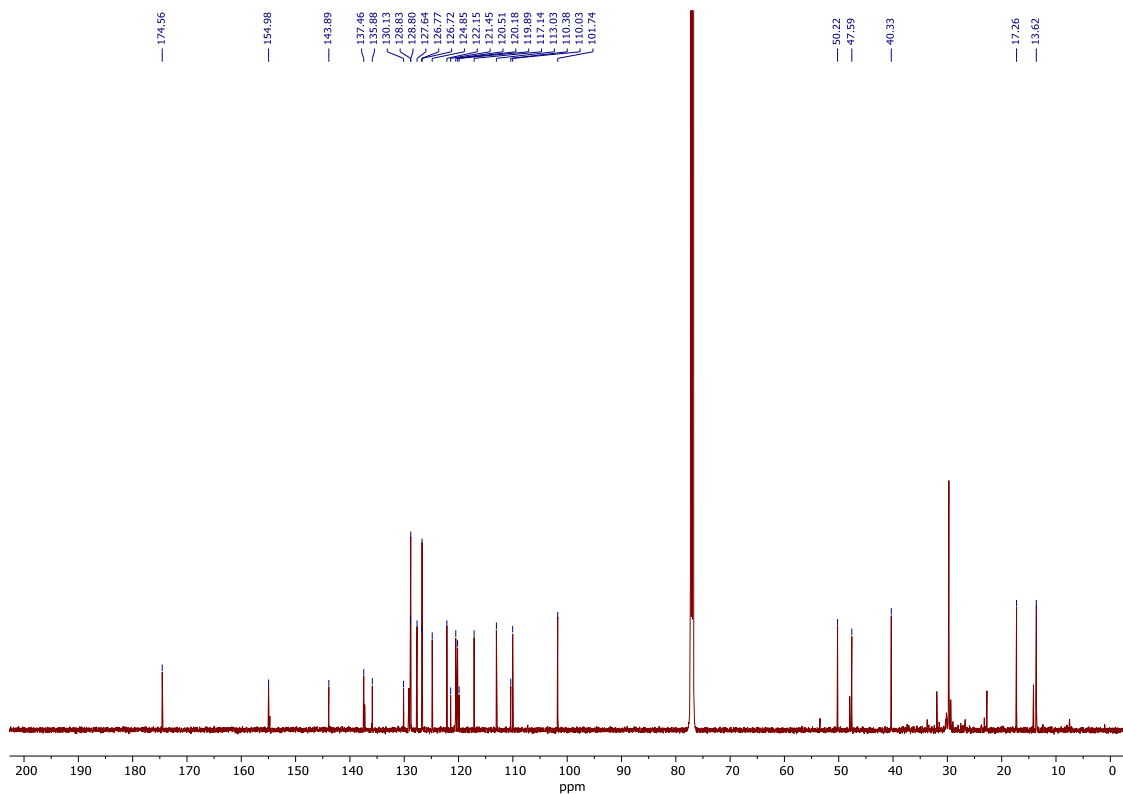

<sup>1</sup>H NMR (CDCl<sub>3</sub>) AJ2-9

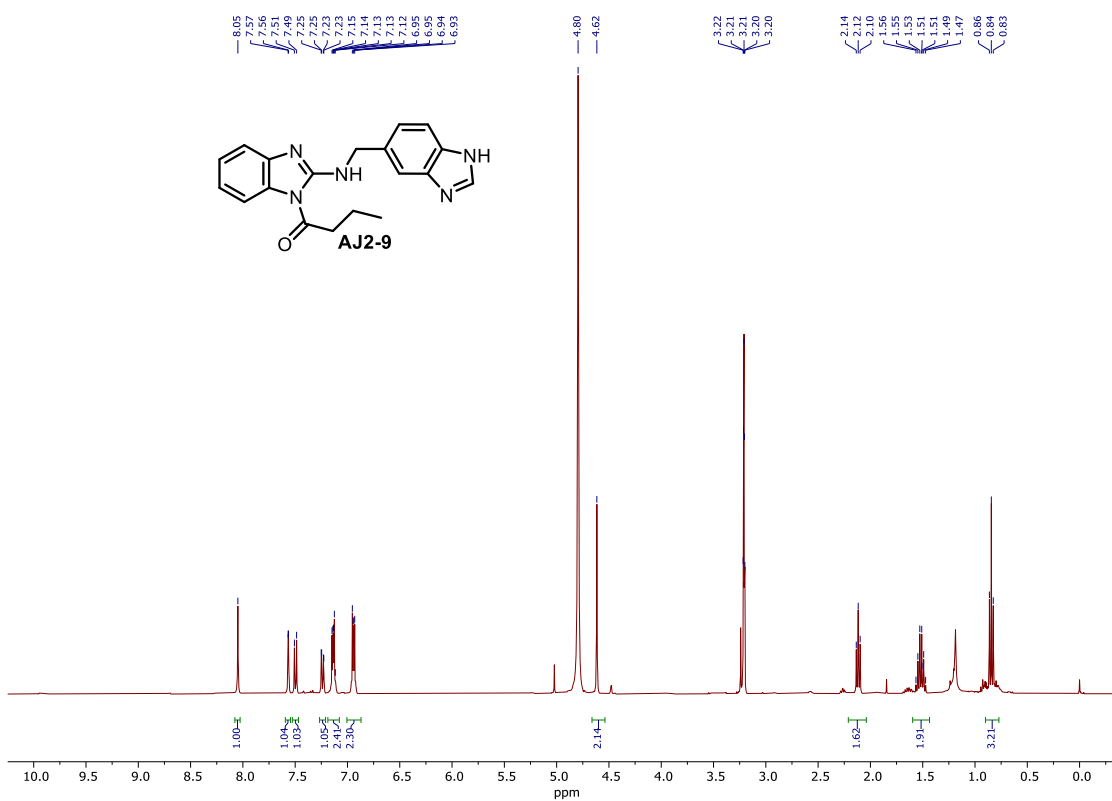

<sup>13</sup>C NMR (CDCl<sub>3</sub>) AJ2-9

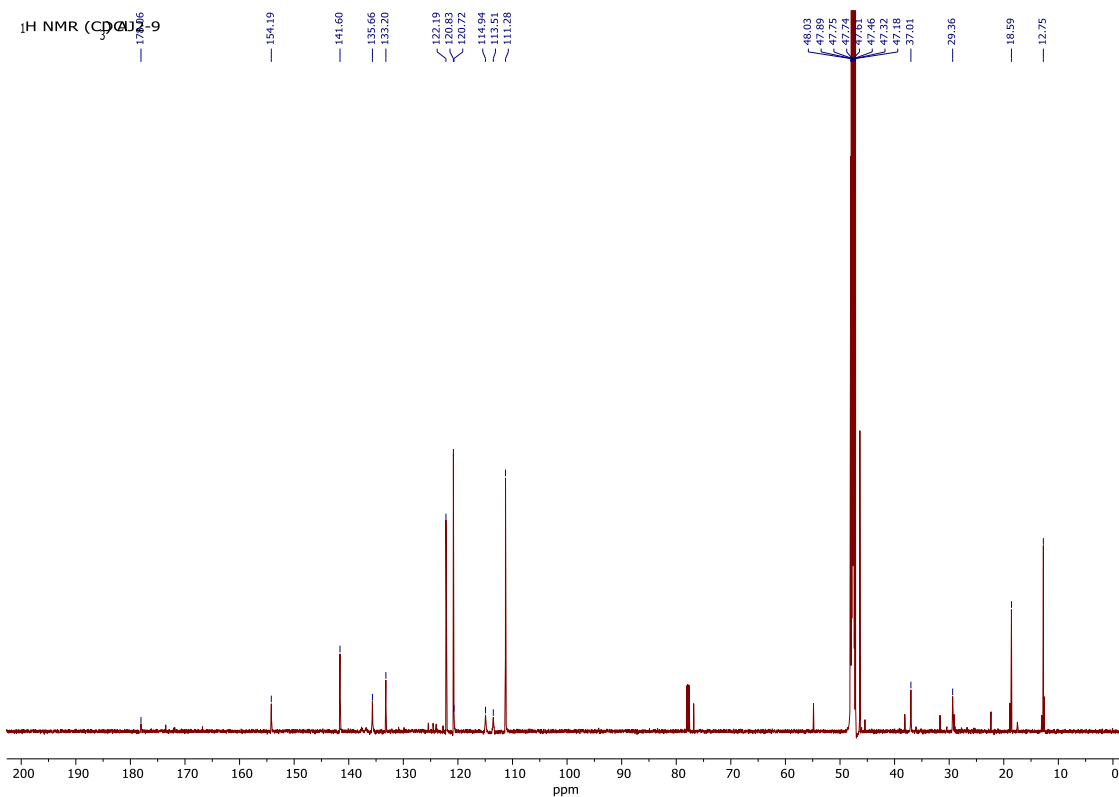

<sup>1</sup>H NMR (CDCl<sub>3</sub>) AJ2-10

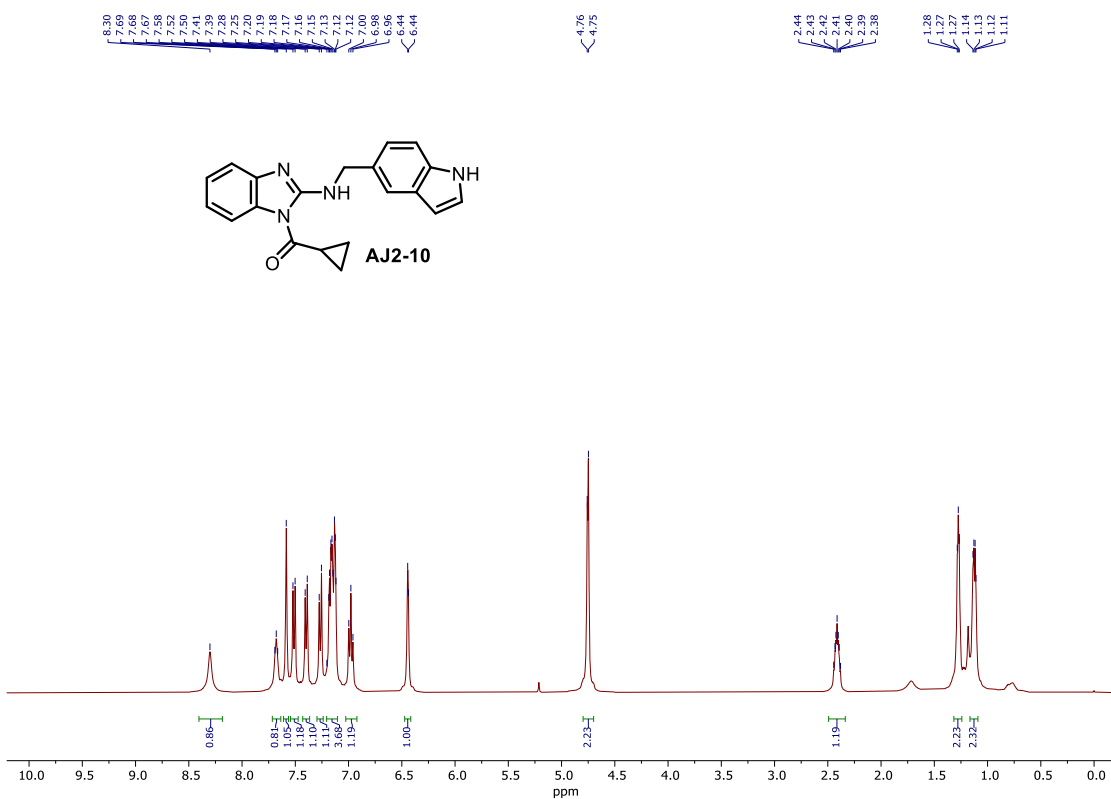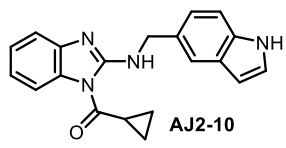

<sup>13</sup>C NMR (CDCl<sub>3</sub>) AJ2-10

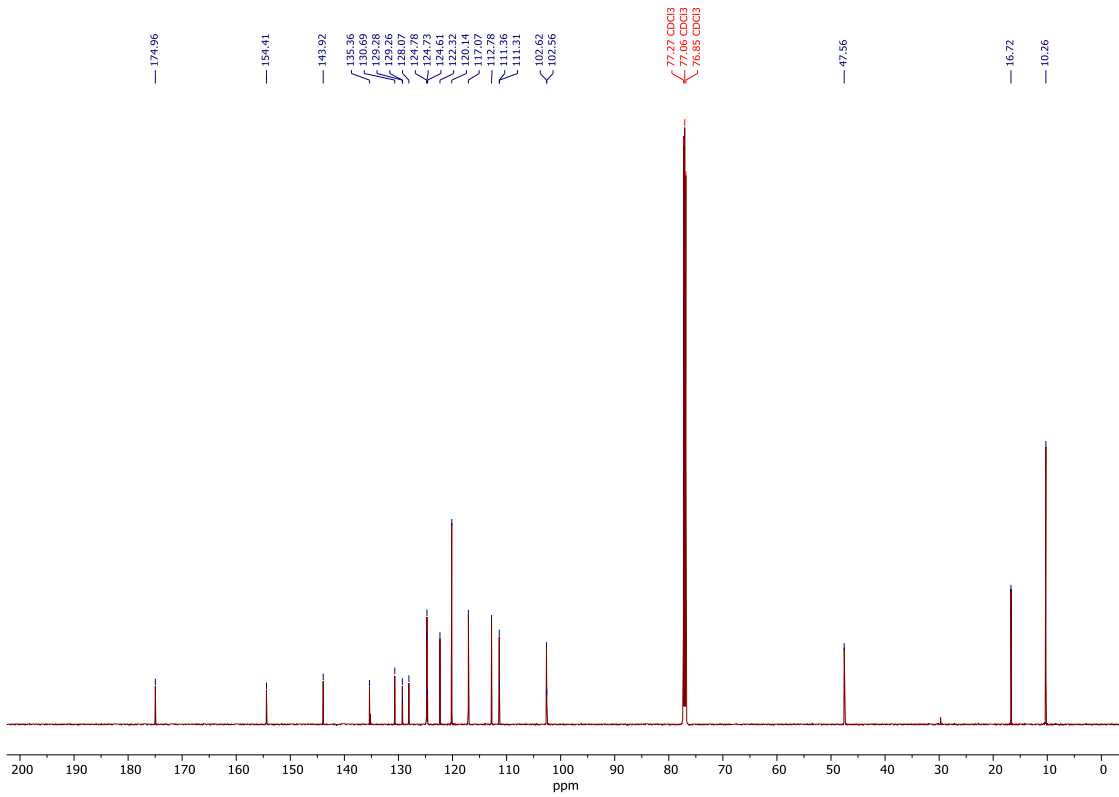

<sup>1</sup>H NMR (CDCl<sub>3</sub>) AJ2-11

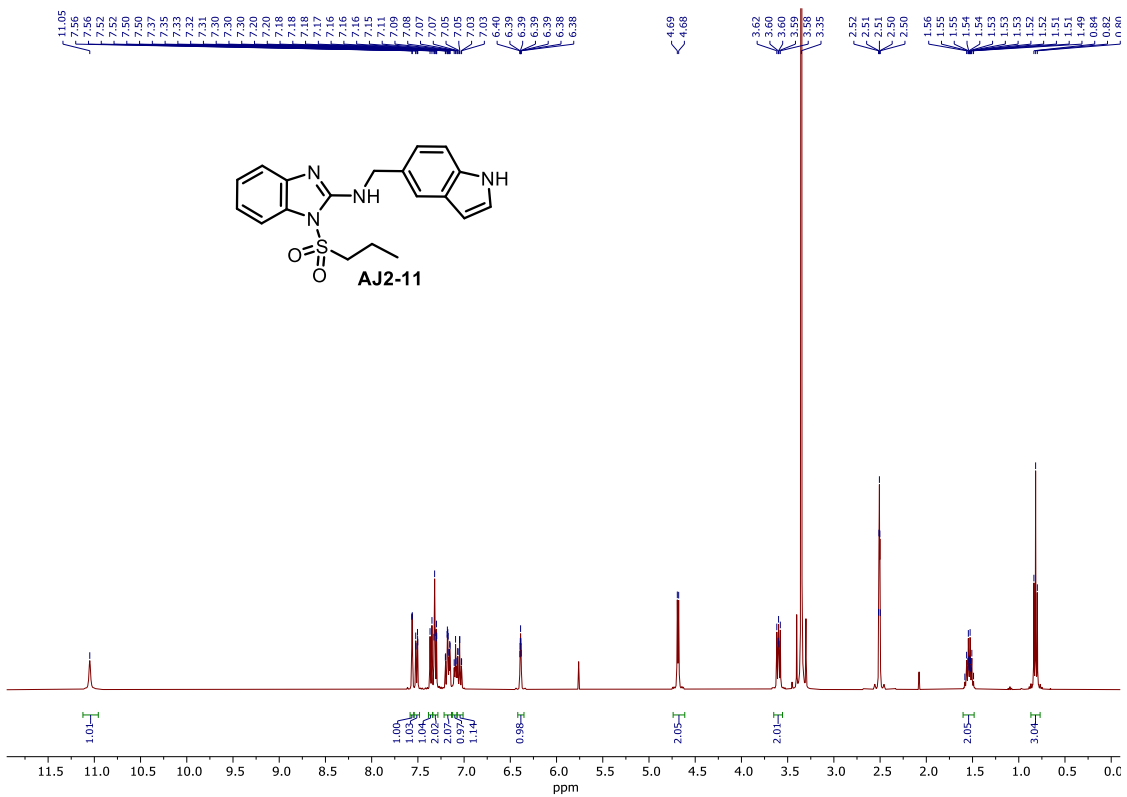

<sup>13</sup>C NMR (CDCl<sub>3</sub>) AJ2-11

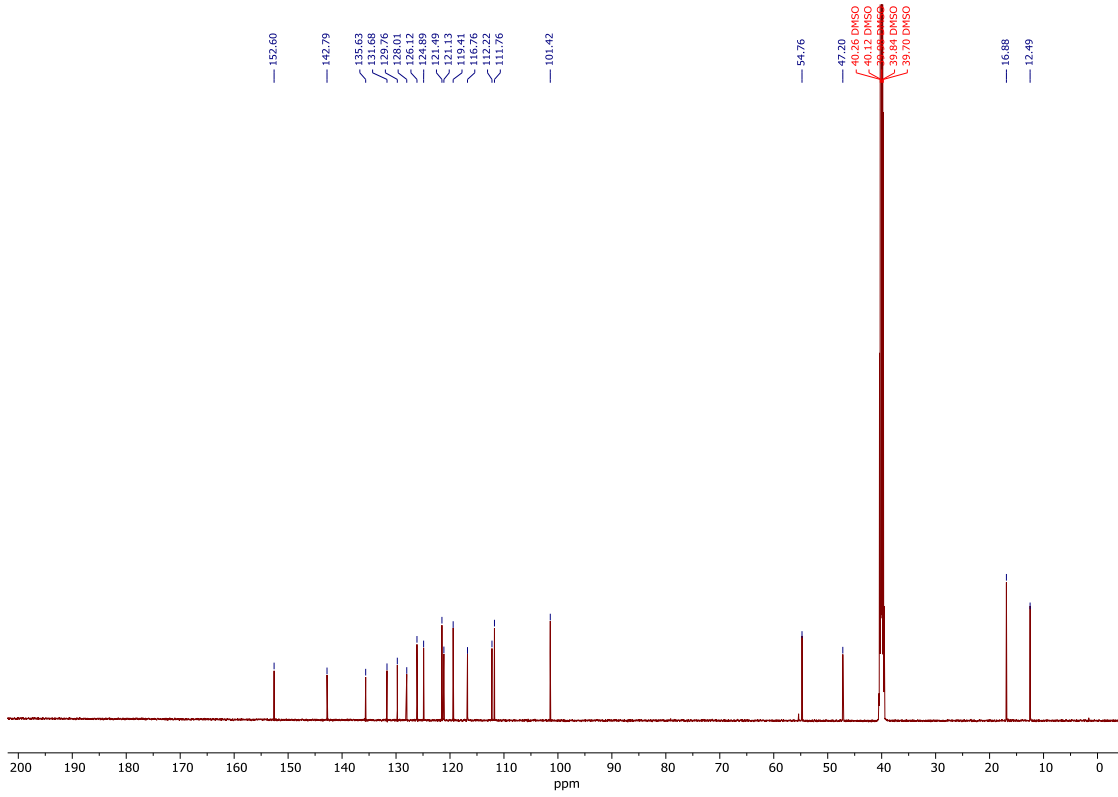

<sup>1</sup>H NMR (CDCl<sub>3</sub>) AJ2-13

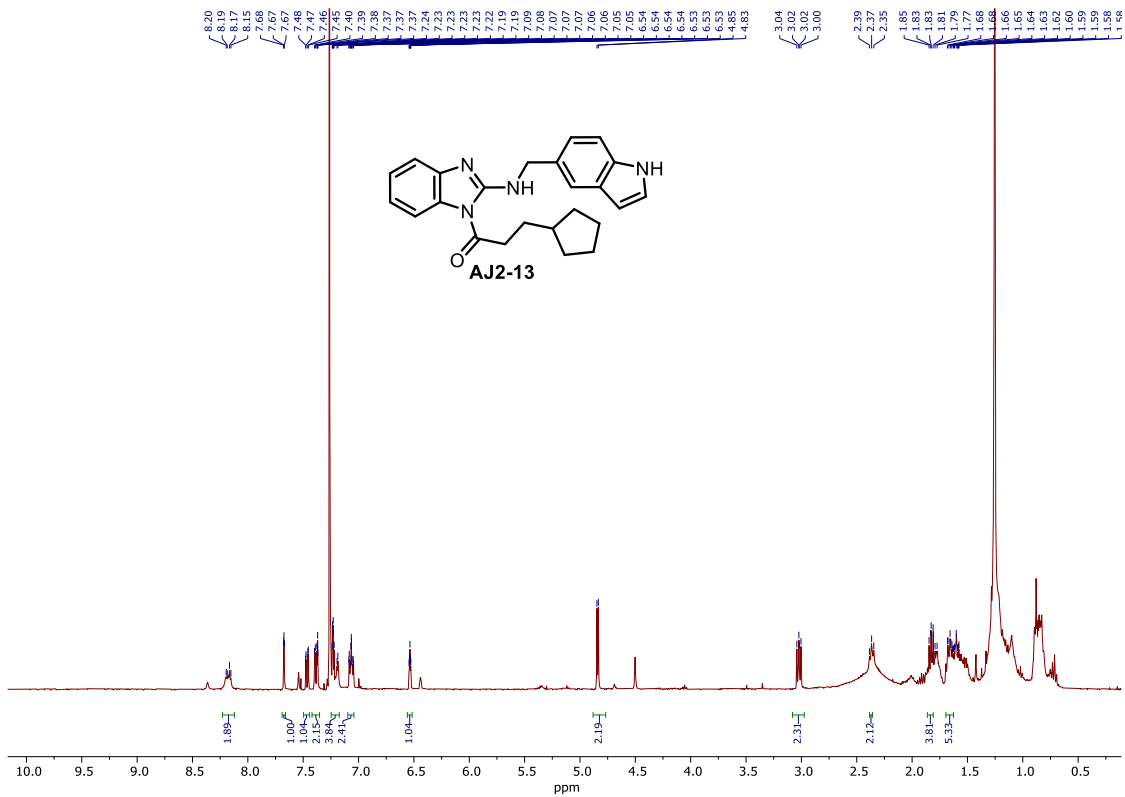

<sup>13</sup>C NMR (CDCl<sub>3</sub>) AJ2-13

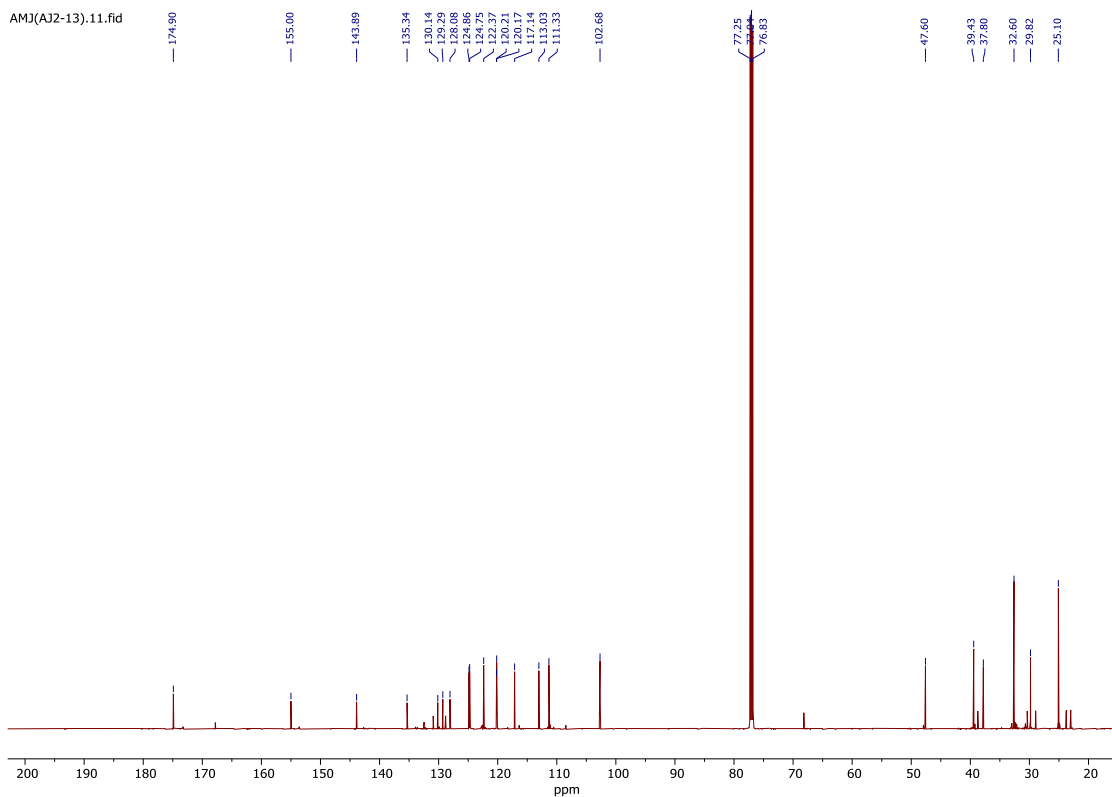

<sup>1</sup>H NMR (CDCl<sub>3</sub>) AJ2-14

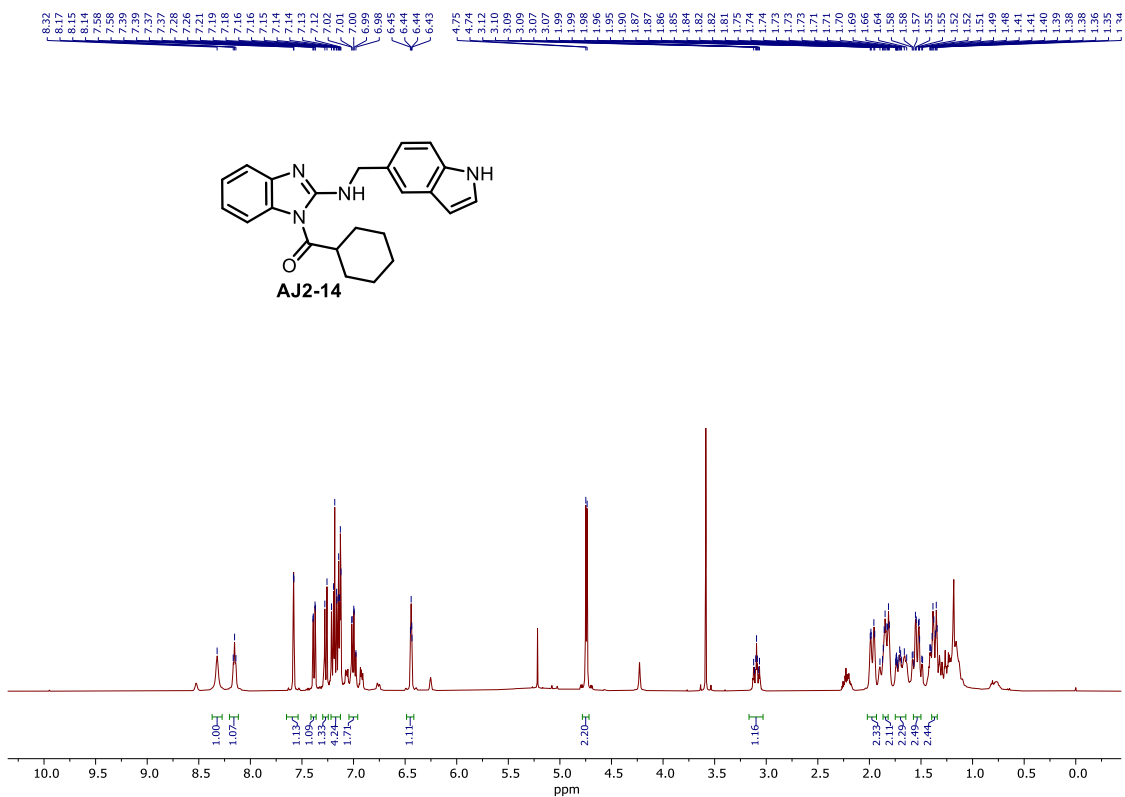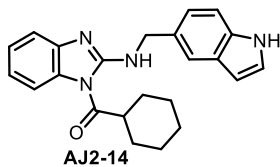

<sup>13</sup>C NMR (CDCl<sub>3</sub>) AJ2-14

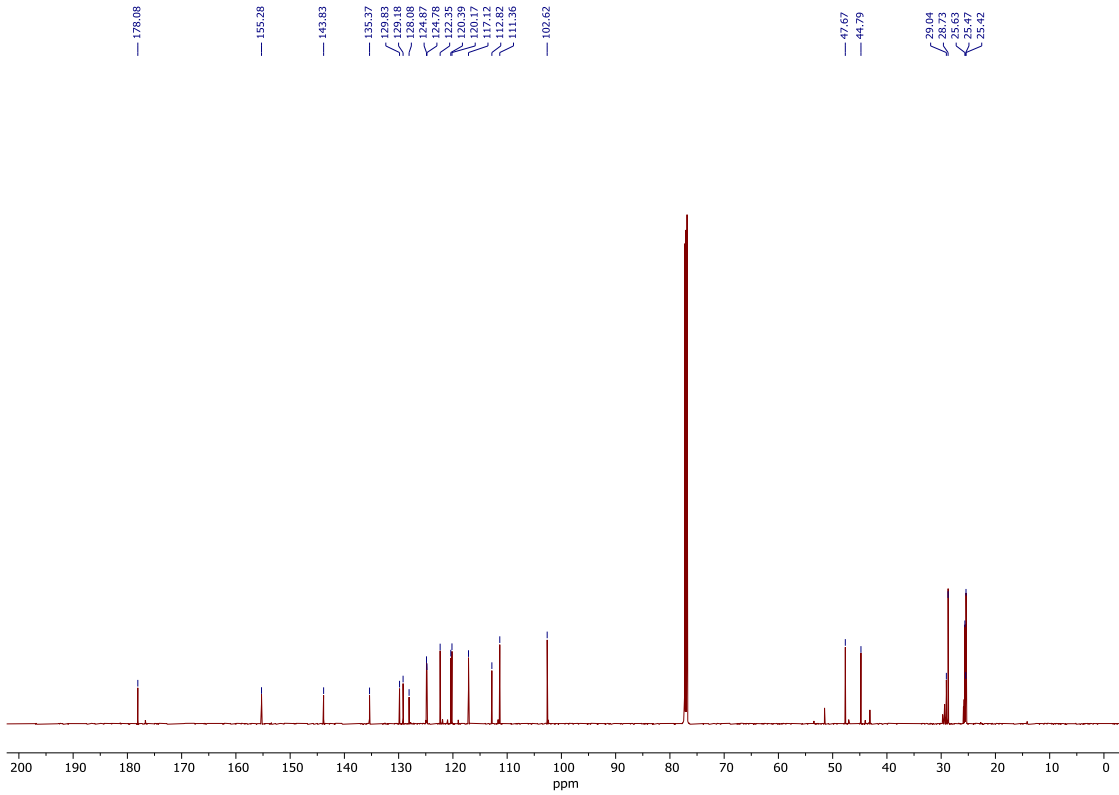

<sup>1</sup>H NMR (CDCl<sub>3</sub>) AJ2-18

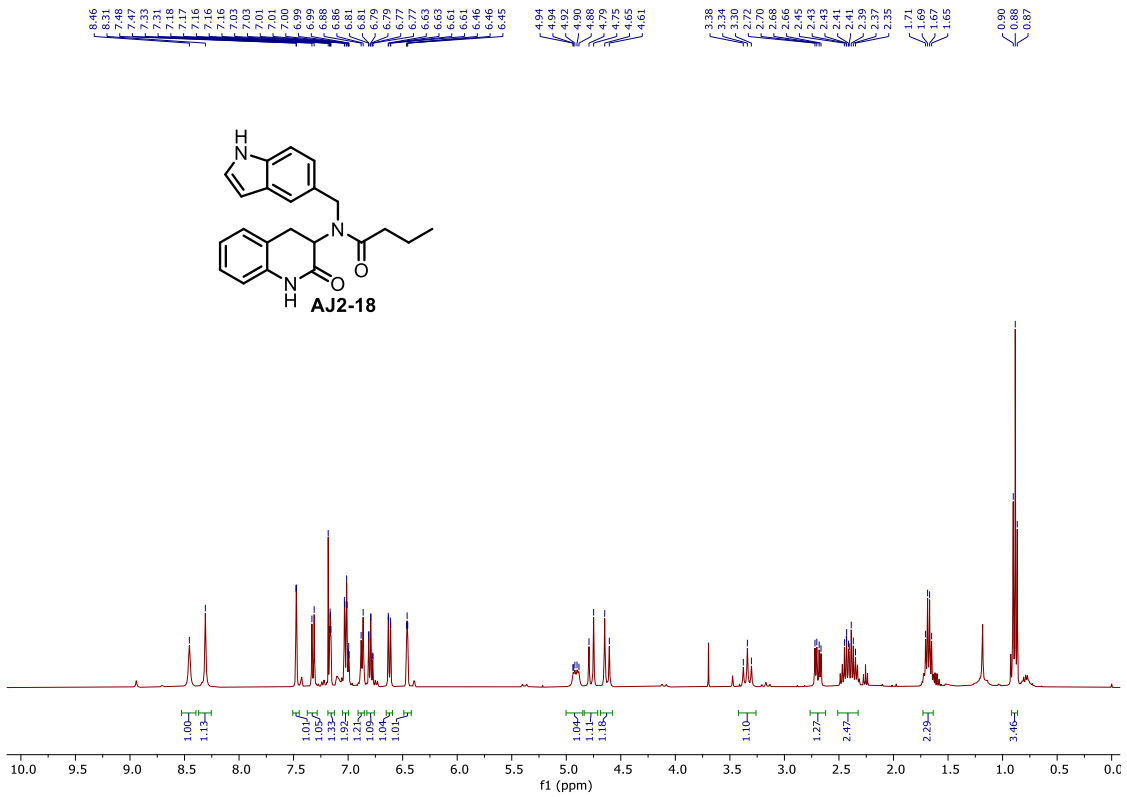



<sup>13</sup>C NMR (CDCl<sub>3</sub>) AJ2-22

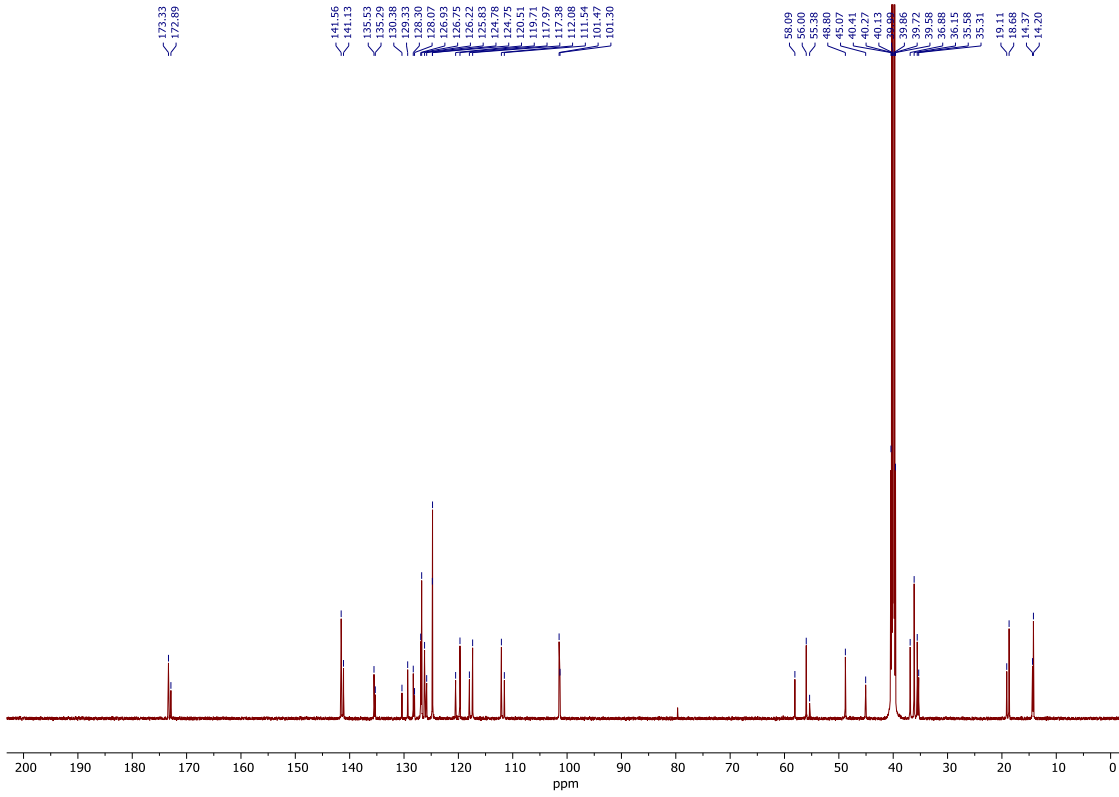

<sup>1</sup>H NMR (CDCl<sub>3</sub>) AJ2-23

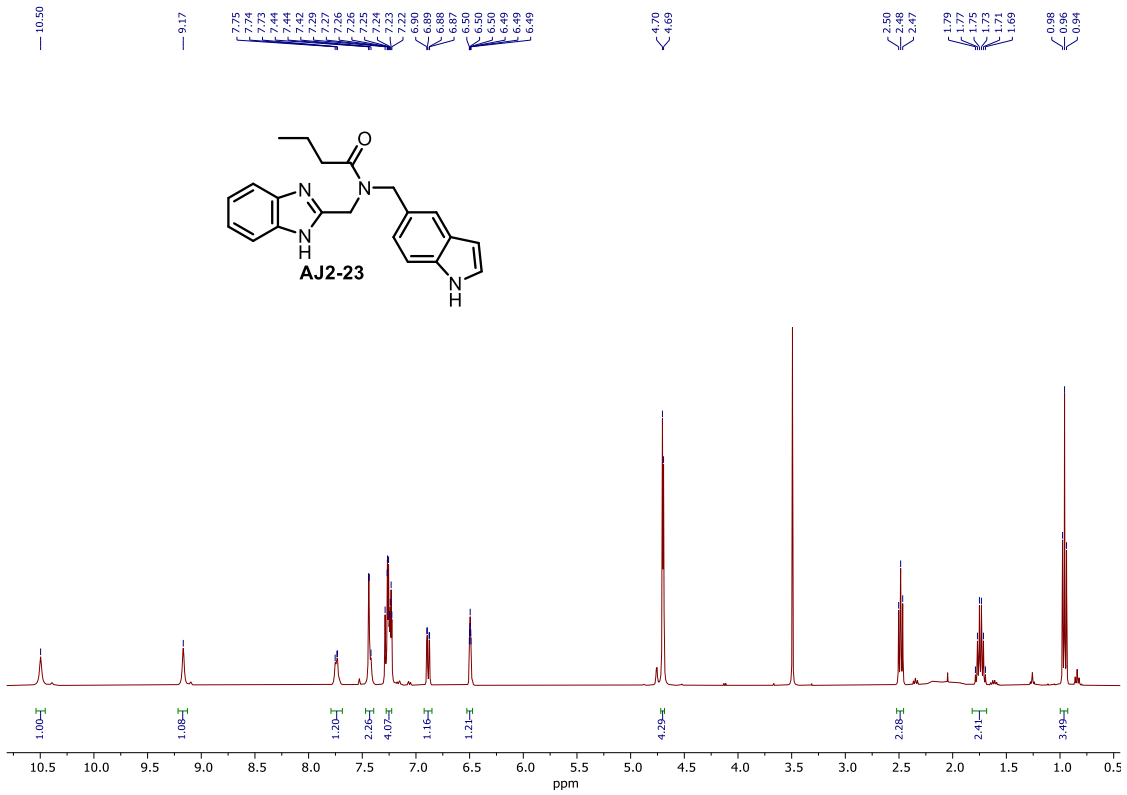



$^{13}\text{C}$  NMR ( $\text{CDCl}_3$ ) AJ2-23

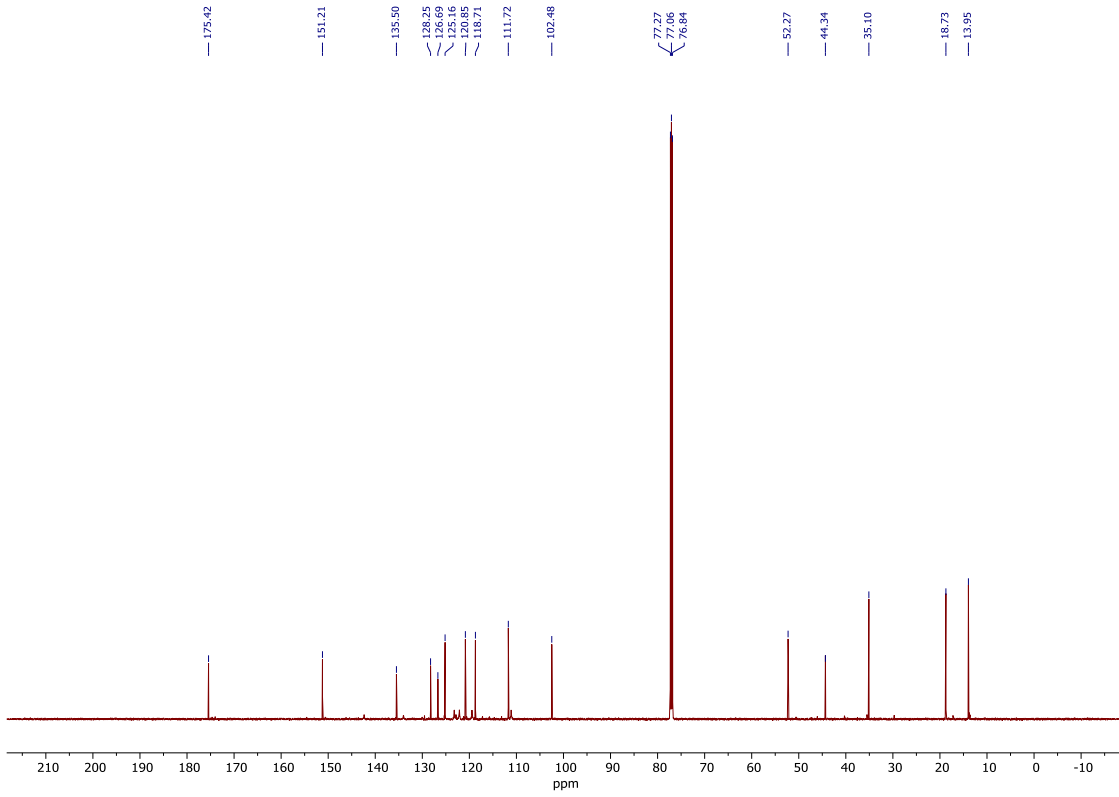

$^1\text{H}$  NMR ( $\text{CDCl}_3$ ) AJ2-25

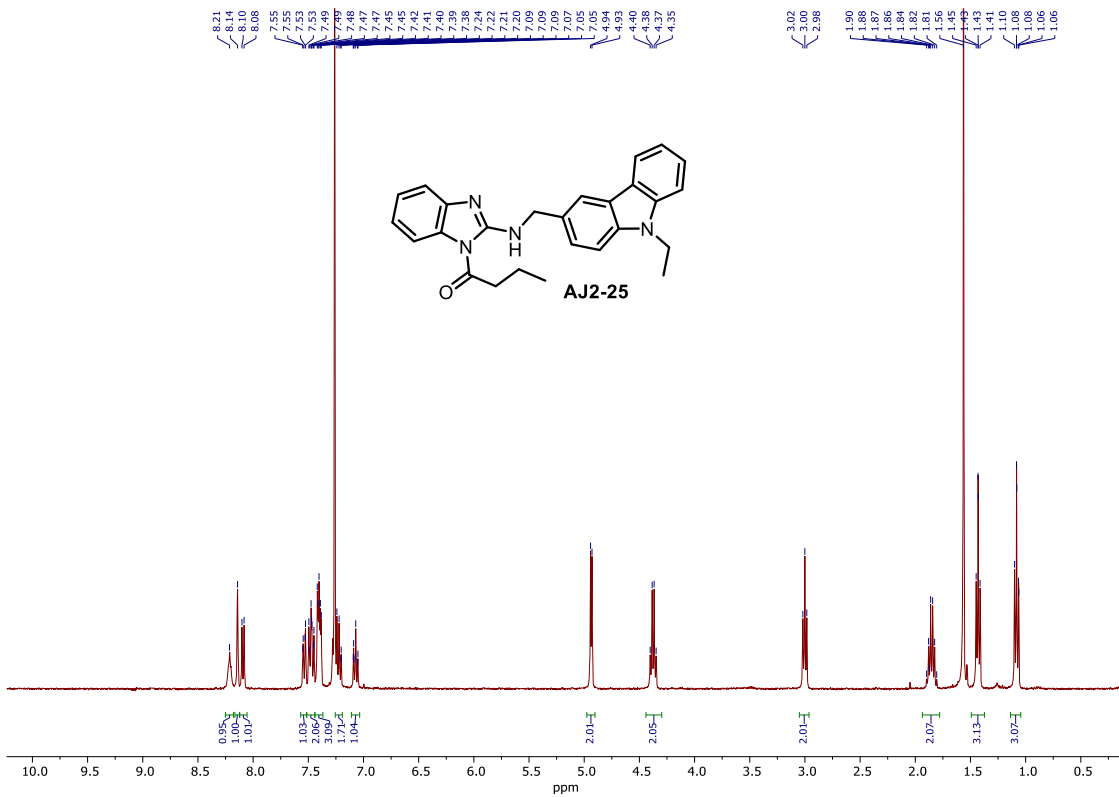

<sup>13</sup>C NMR (CDCl<sub>3</sub>) AJ2-25

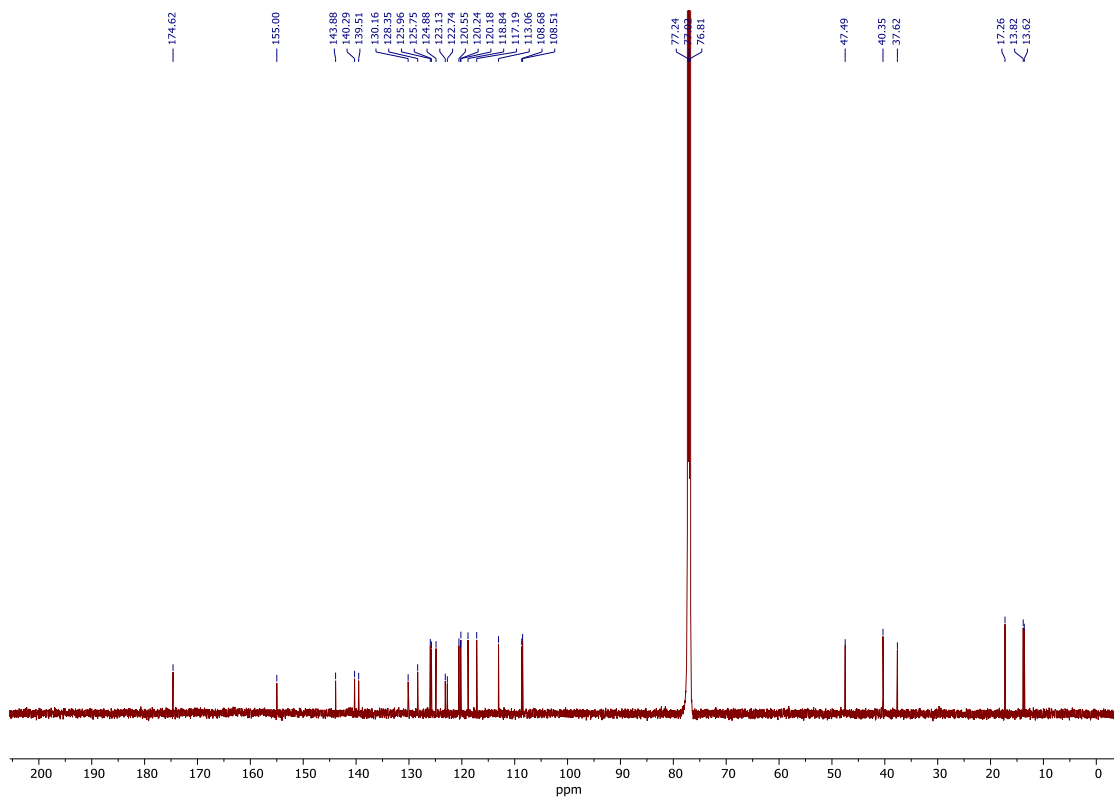

<sup>1</sup>H NMR (CDCl<sub>3</sub>) AJ2-26

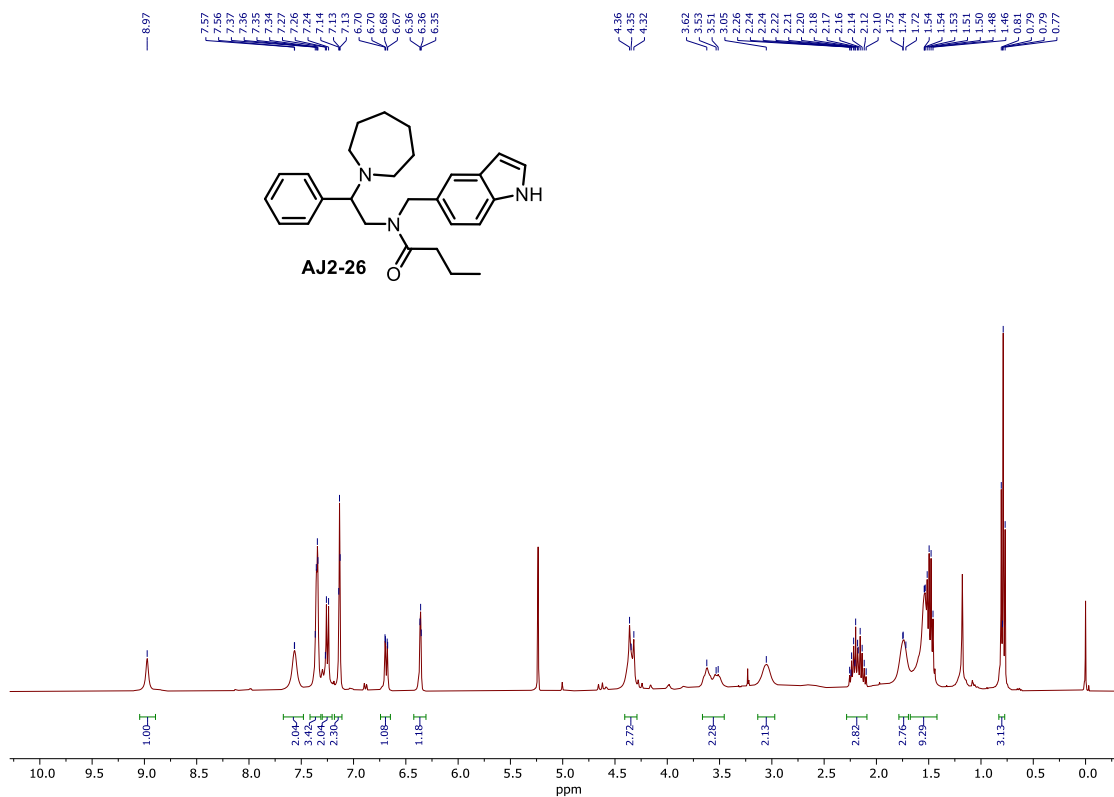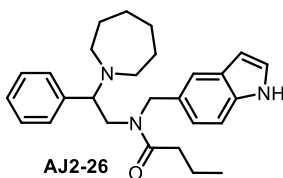

<sup>13</sup>C NMR (CDCl<sub>3</sub>) AJ2-26

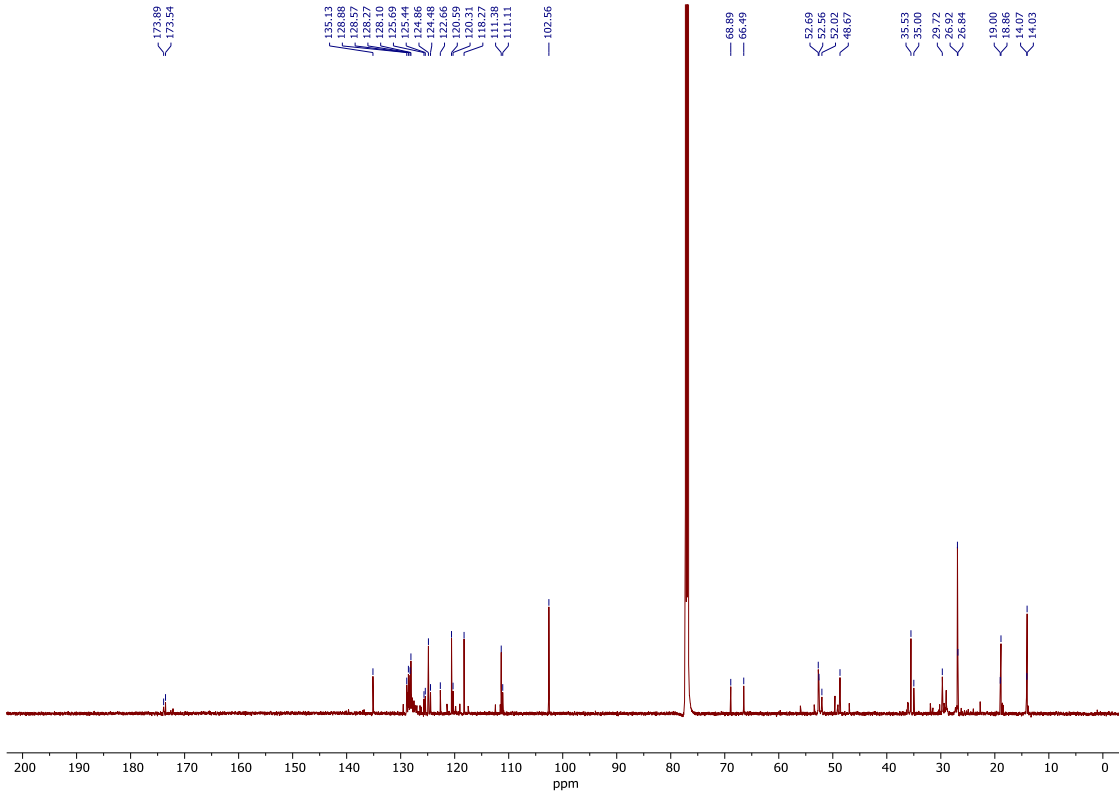

<sup>1</sup>H NMR (CDCl<sub>3</sub>) AJ2-27

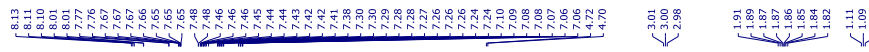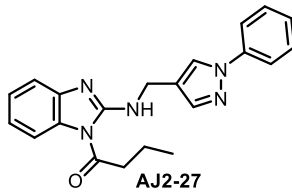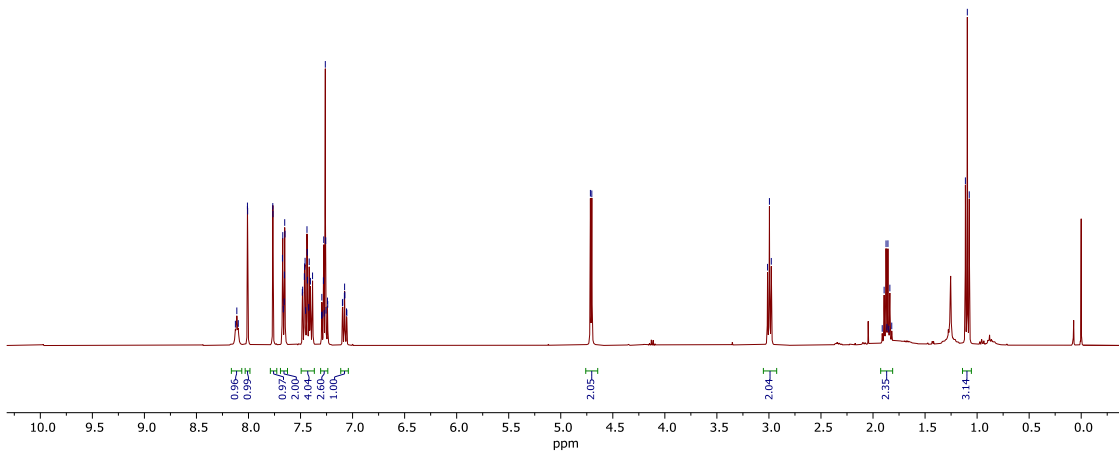

<sup>13</sup>C NMR (CDCl<sub>3</sub>) AJ2-27

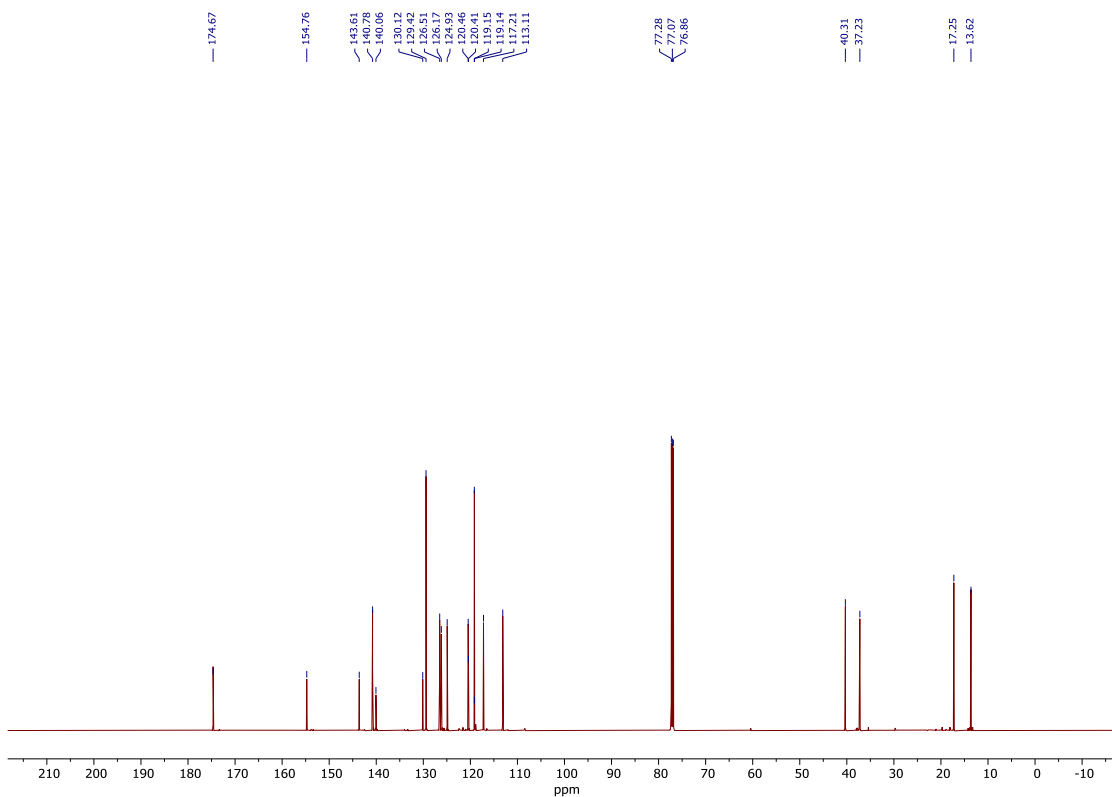

<sup>1</sup>H NMR (CDCl<sub>3</sub>) AJ2-29

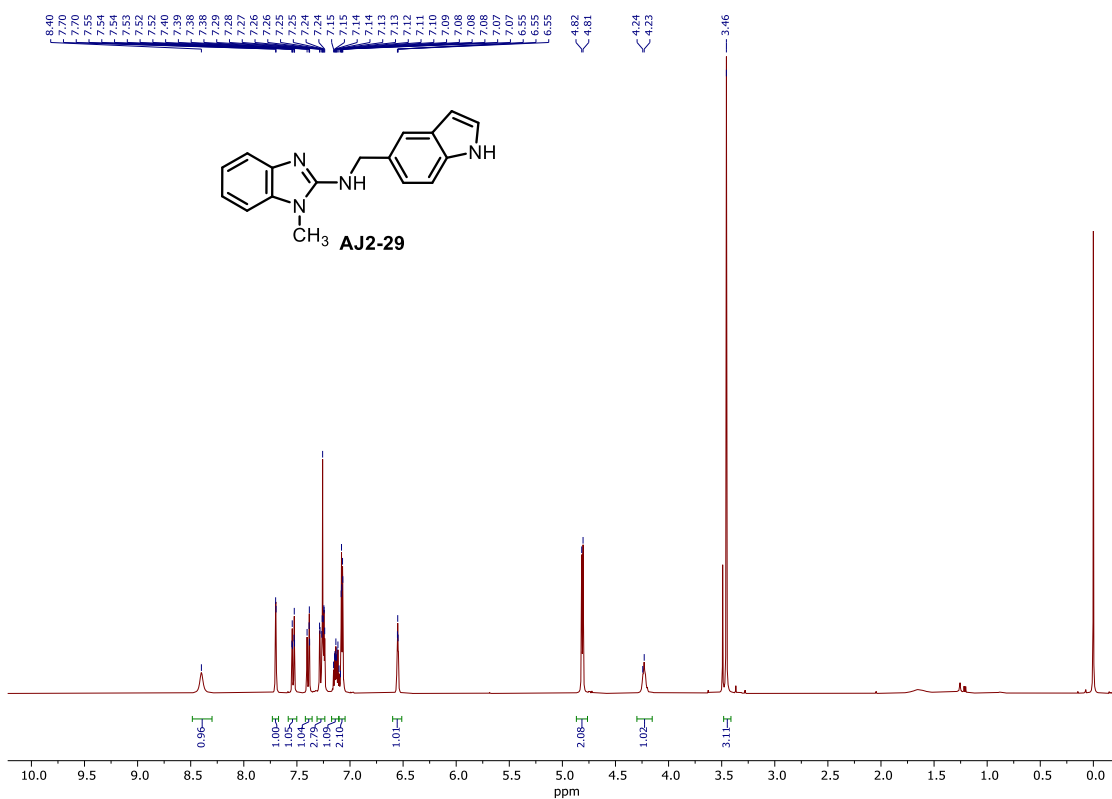

<sup>13</sup>C NMR (CDCl<sub>3</sub>) AJ2-29

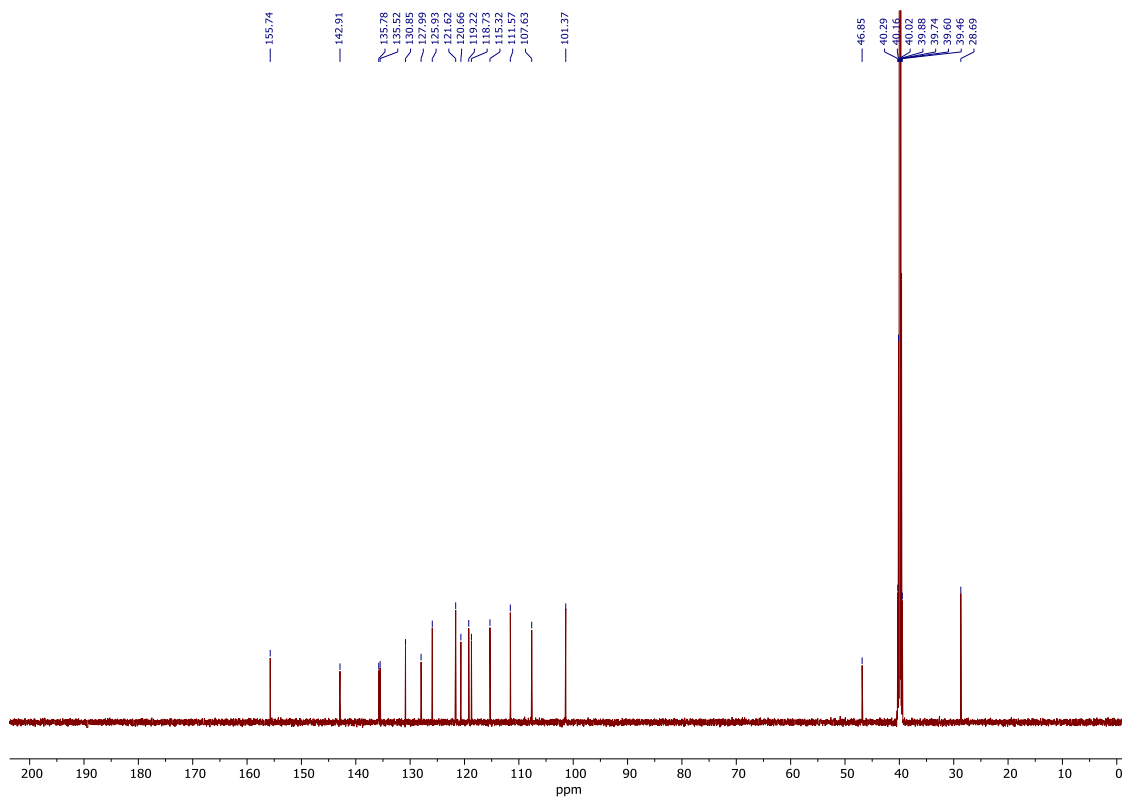

<sup>1</sup>H NMR (DMSO-d<sub>6</sub>) AJ2-30

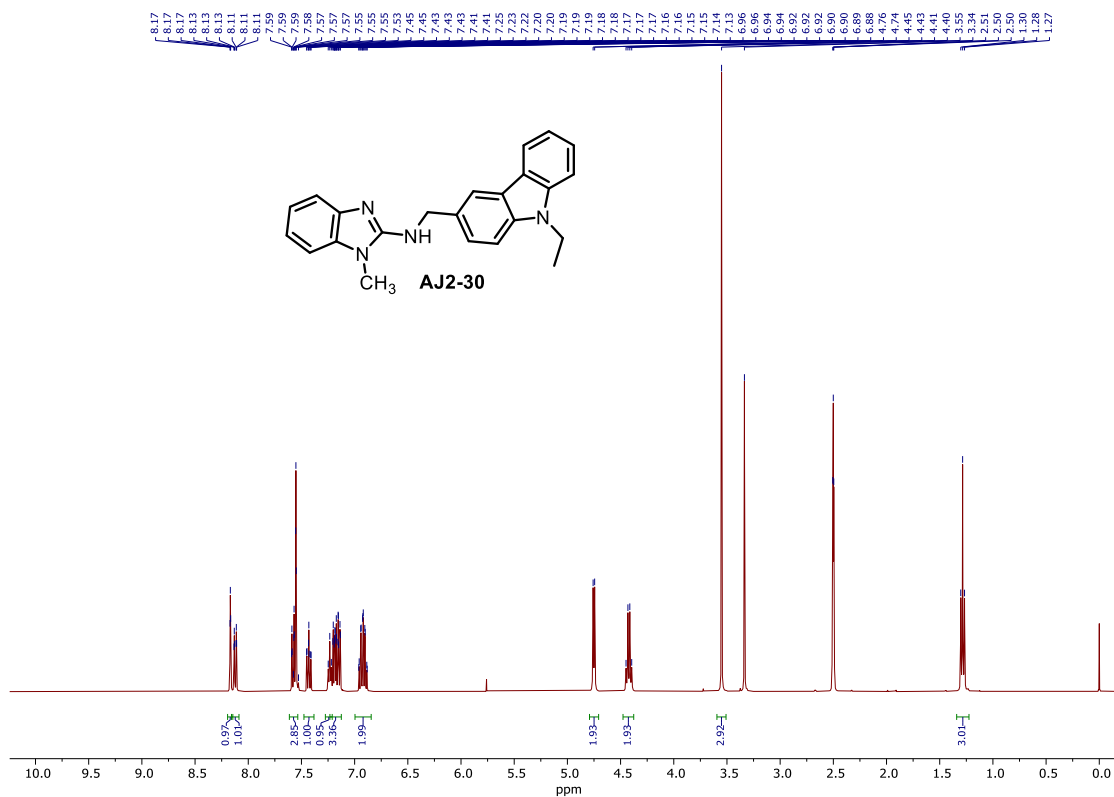

<sup>13</sup>C NMR (DMSO-d<sub>6</sub>) AJ2-30

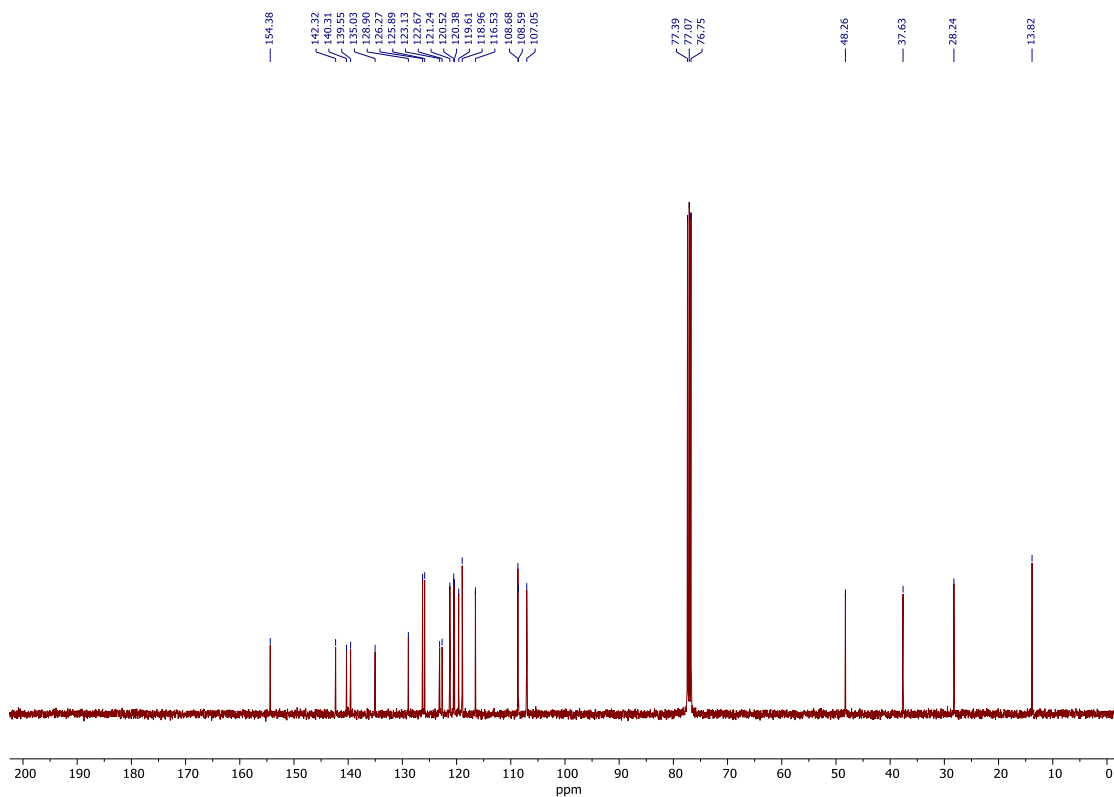

<sup>1</sup>H NMR (DMSO-d<sub>6</sub>) AJ2-31

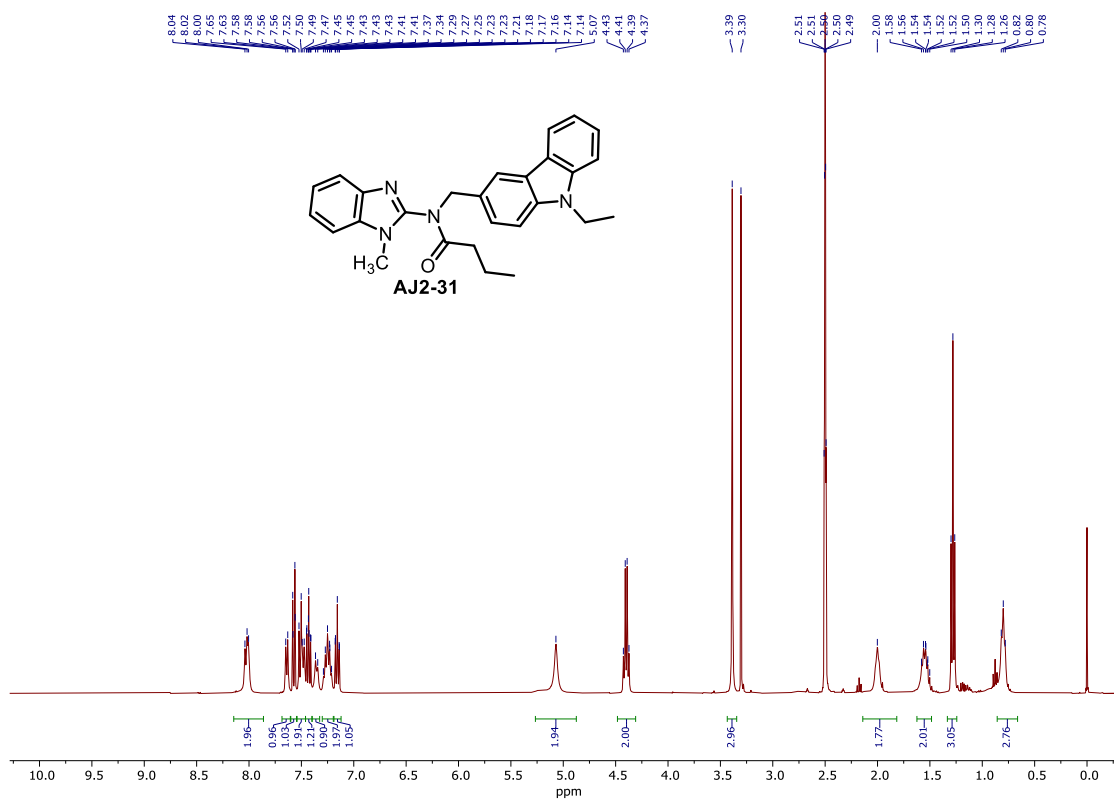

<sup>1</sup>H NMR (DMSO-d<sub>6</sub> at 100°C) AJ2-31

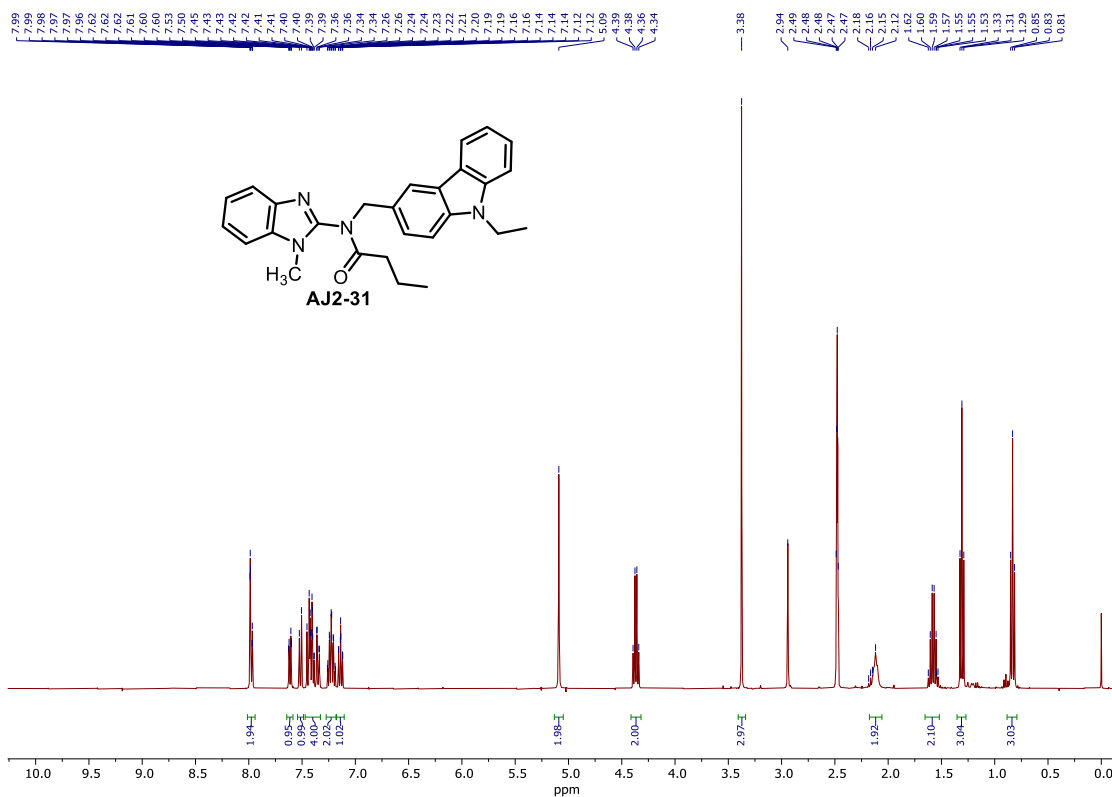

<sup>13</sup>C NMR (DMSO-d<sub>6</sub>) AJ2-31

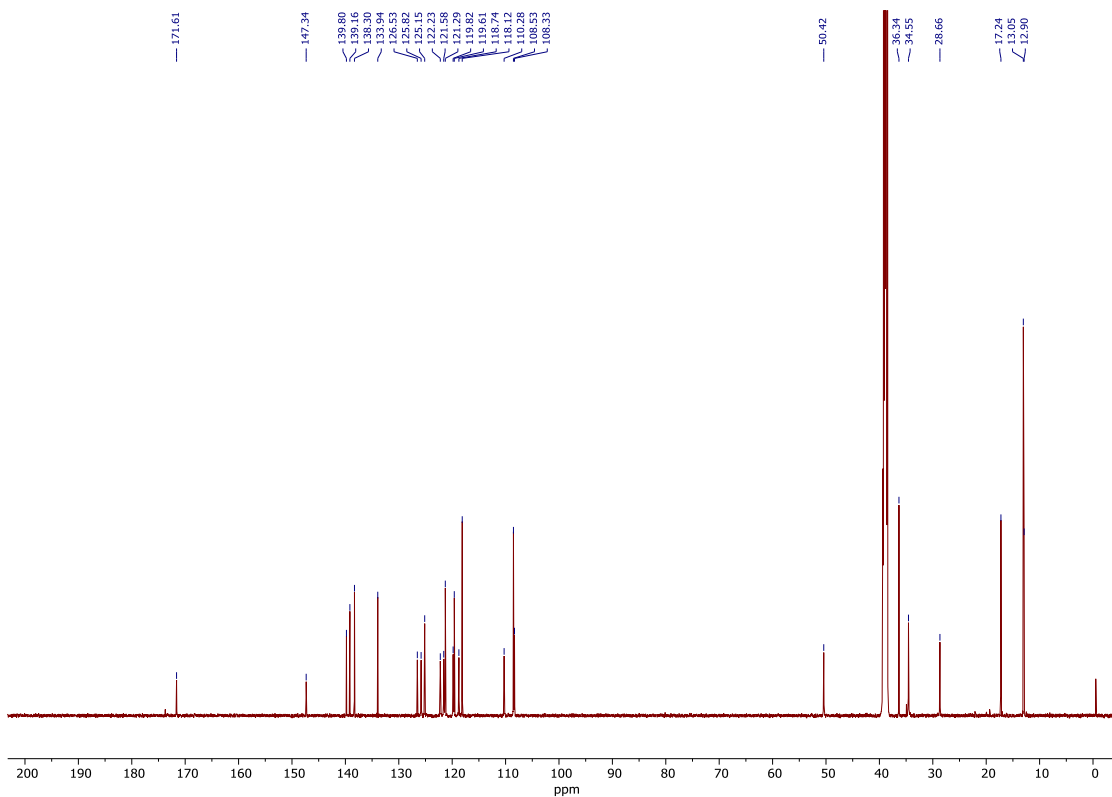

<sup>1</sup>H NMR (CDCl<sub>3</sub>) AJ2-32

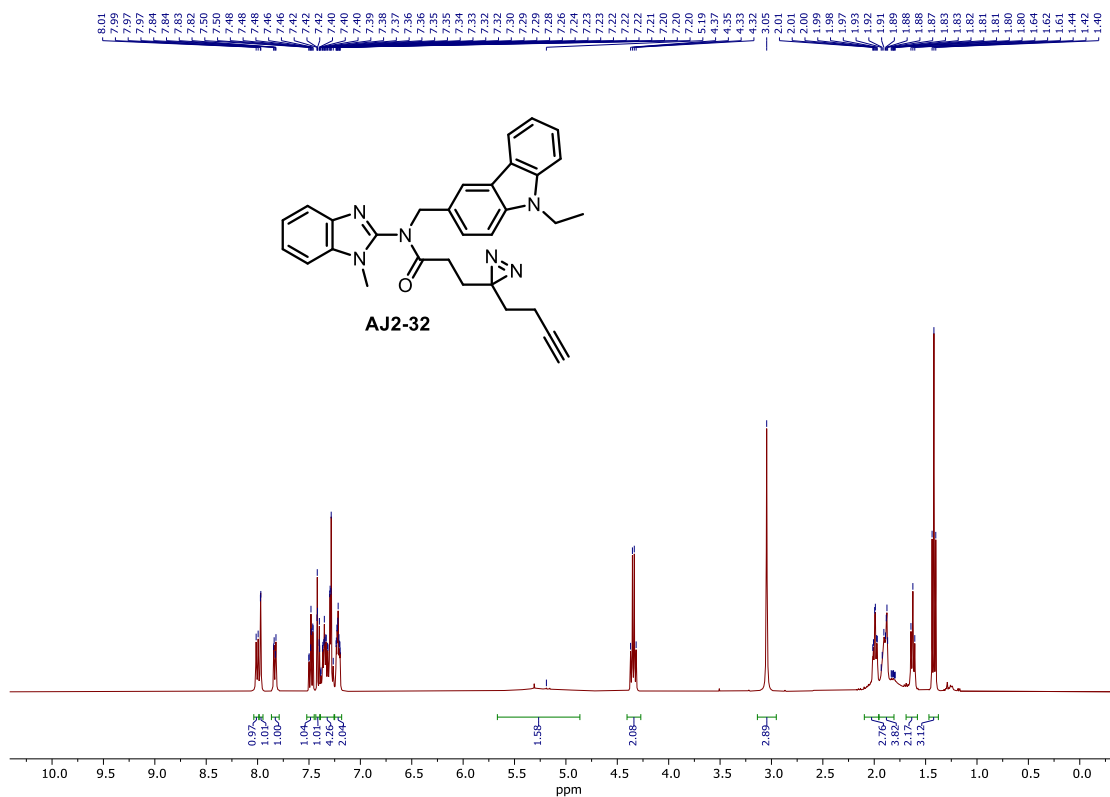

<sup>13</sup>C NMR (CDCl<sub>3</sub>) AJ2-32

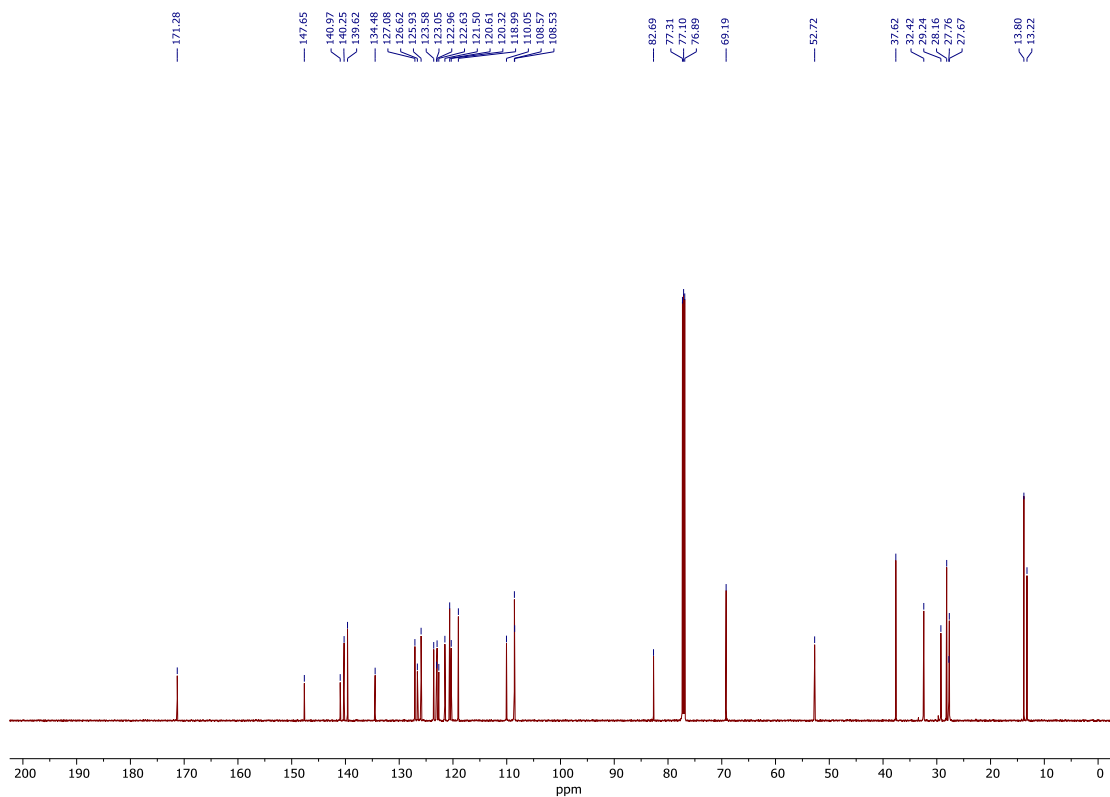



<sup>1</sup>H NMR (CD<sub>3</sub>OD) AJ2-38

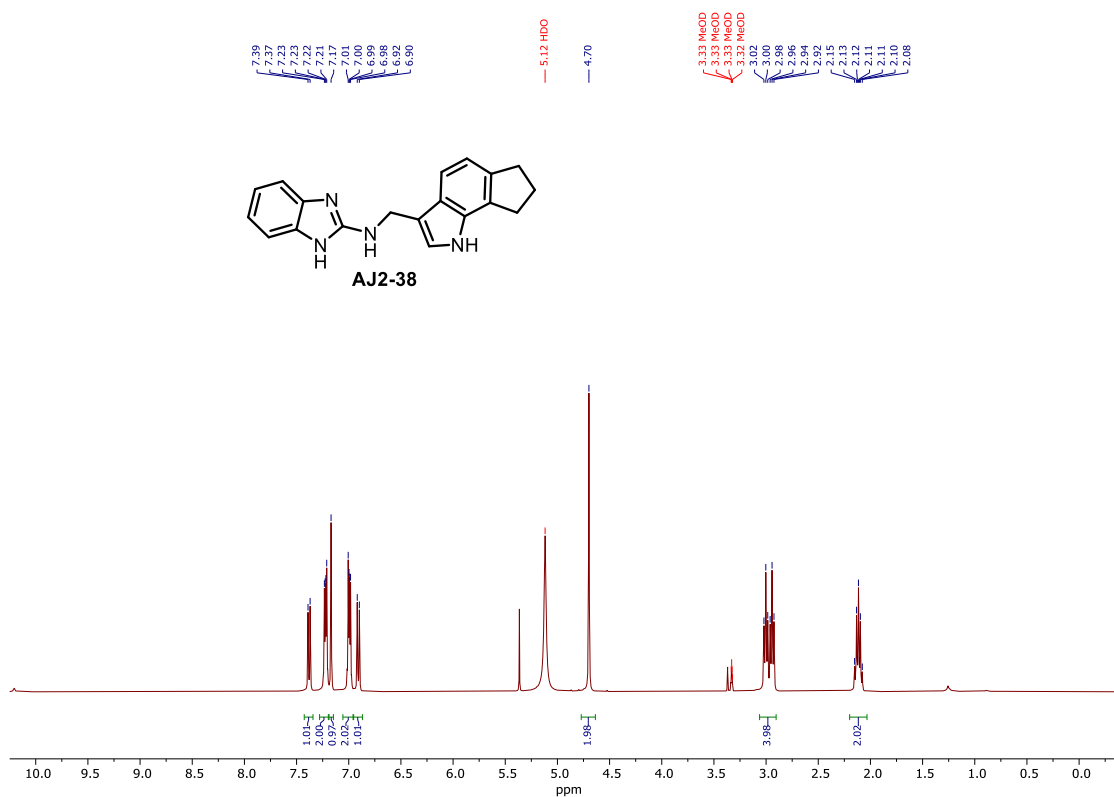

<sup>13</sup>C NMR (CD<sub>3</sub>OD) AJ2-38

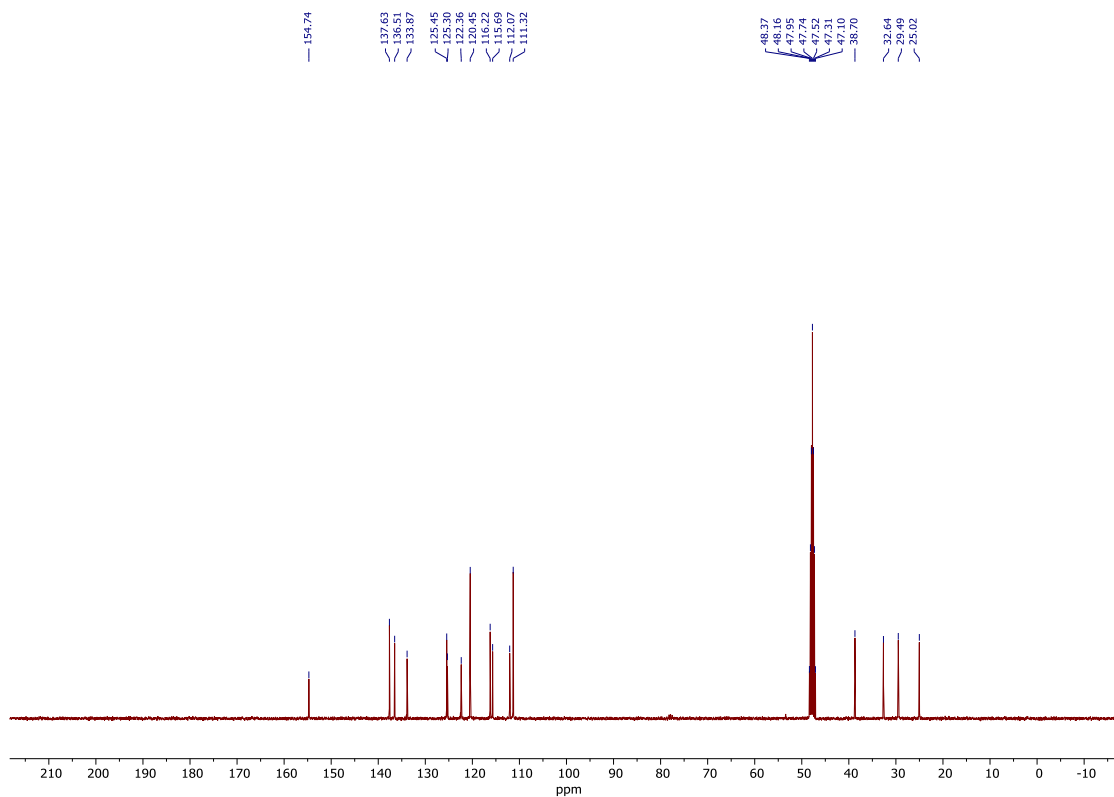

<sup>1</sup>H NMR (CD<sub>3</sub>OD) AJ2-46

7.81, 7.81, 7.79, 7.79, 7.77, 7.77, 7.78, 7.78, 7.58, 7.58, 7.31, 7.31, 7.31, 7.31, 7.29, 7.29, 7.24, 7.24, 7.23, 7.23, 7.02, 7.02, 7.00, 7.00, 6.98, 6.98, 4.90, 4.77, 3.37, 3.34, 3.33, 3.33, 3.32, 3.32

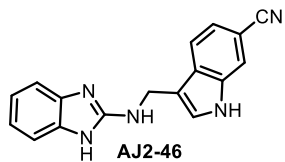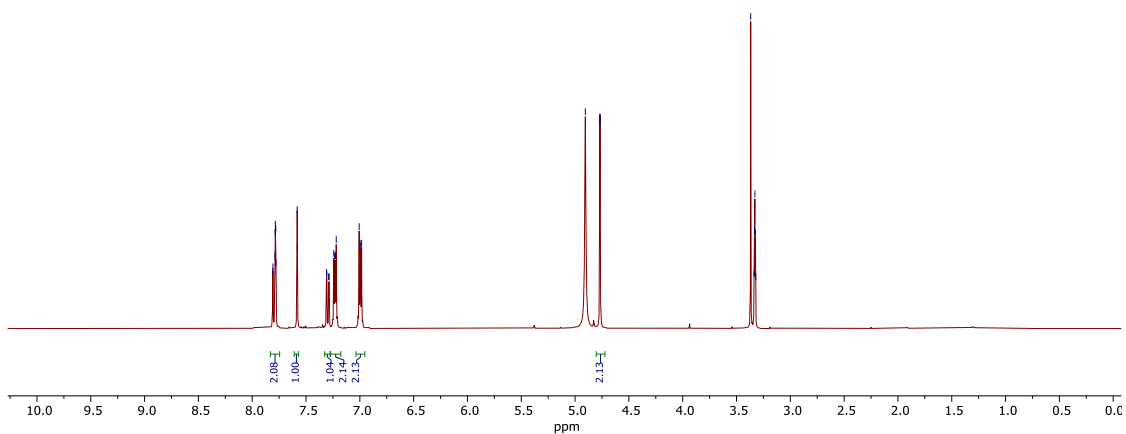

<sup>13</sup>C NMR (CD<sub>3</sub>OD) AJ2-46

155.98, 135.58, 130.16, 128.91, 121.68, 121.20, 120.54, 119.61, 118.65, 114.67, 102.96, 40.34 DMSO, 40.21 DMSO, 40.07 DMSO, 39.83 DMSO, 39.69 DMSO, 39.65 DMSO, 39.51 DMSO, 37.89

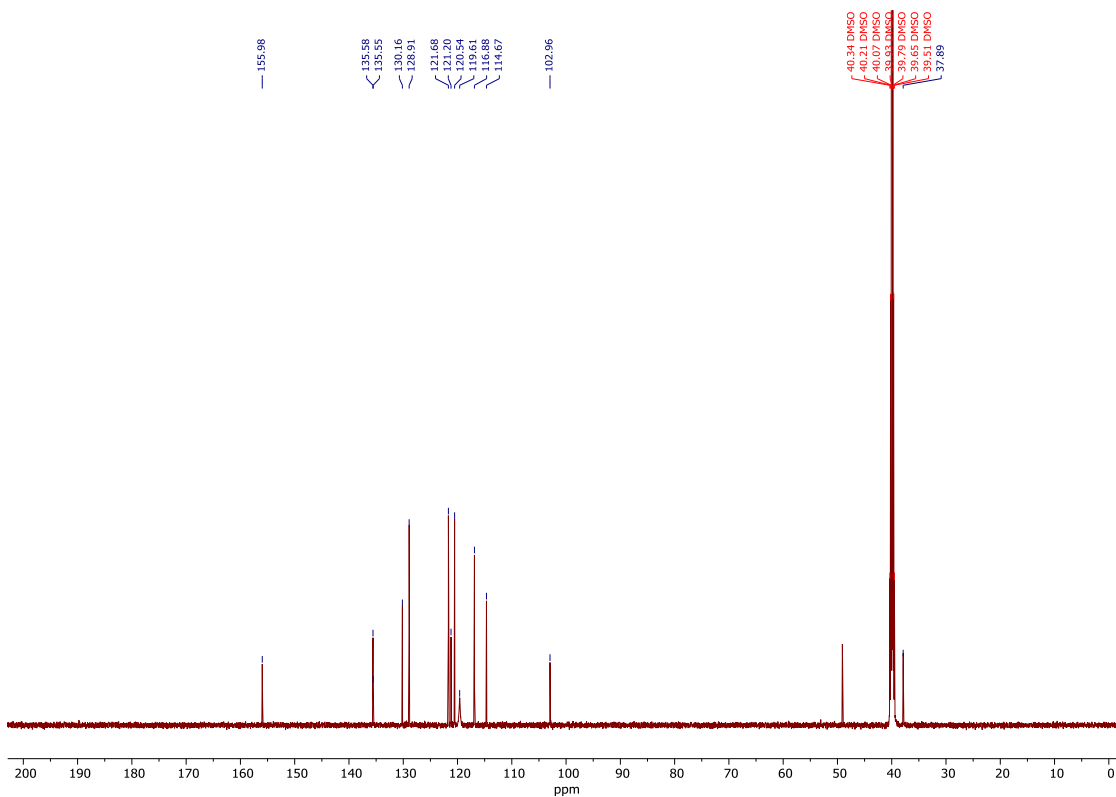

<sup>1</sup>H NMR (CDCl<sub>3</sub>) AJ2-66

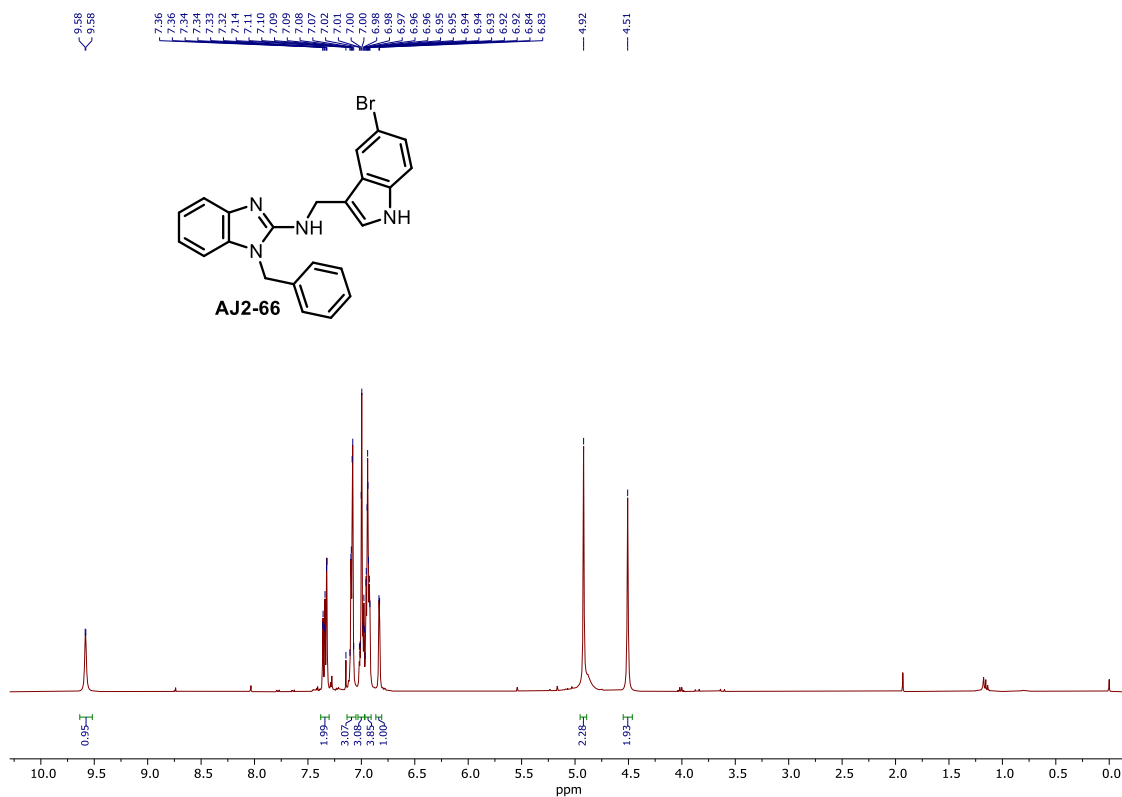

<sup>13</sup>C NMR (CDCl<sub>3</sub>) AJ2-66

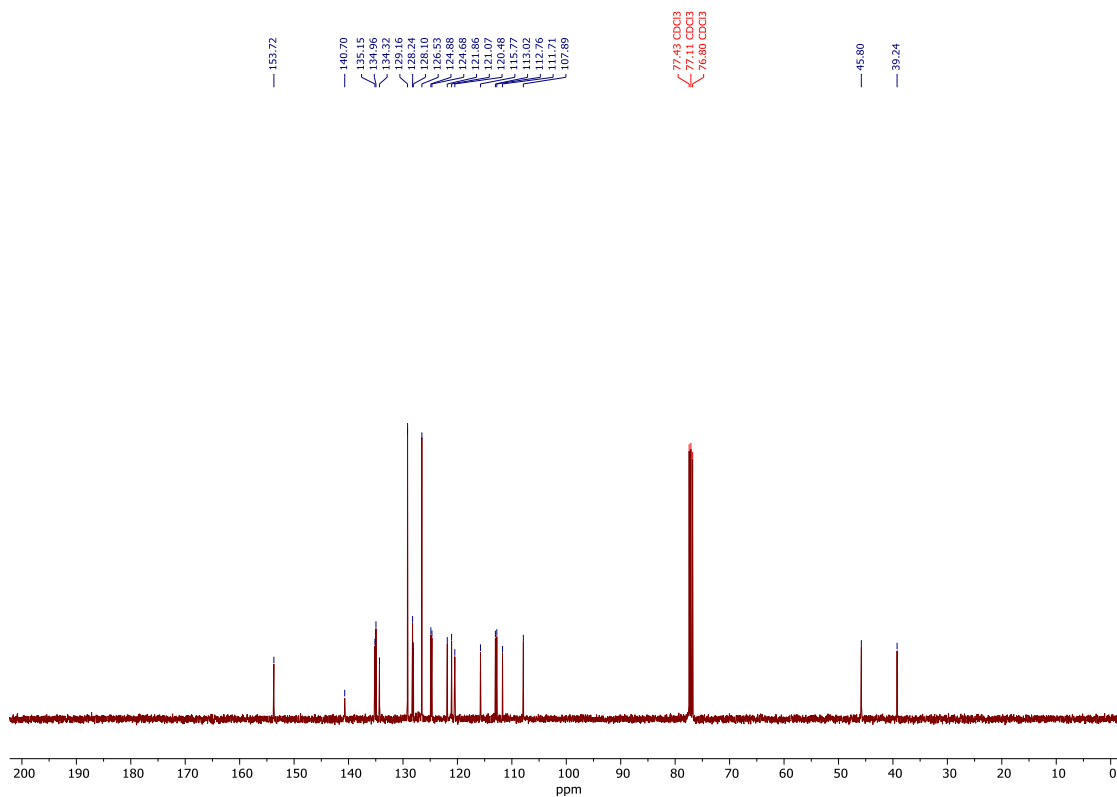

<sup>1</sup>H NMR (CDCl<sub>3</sub>) AJ2-74

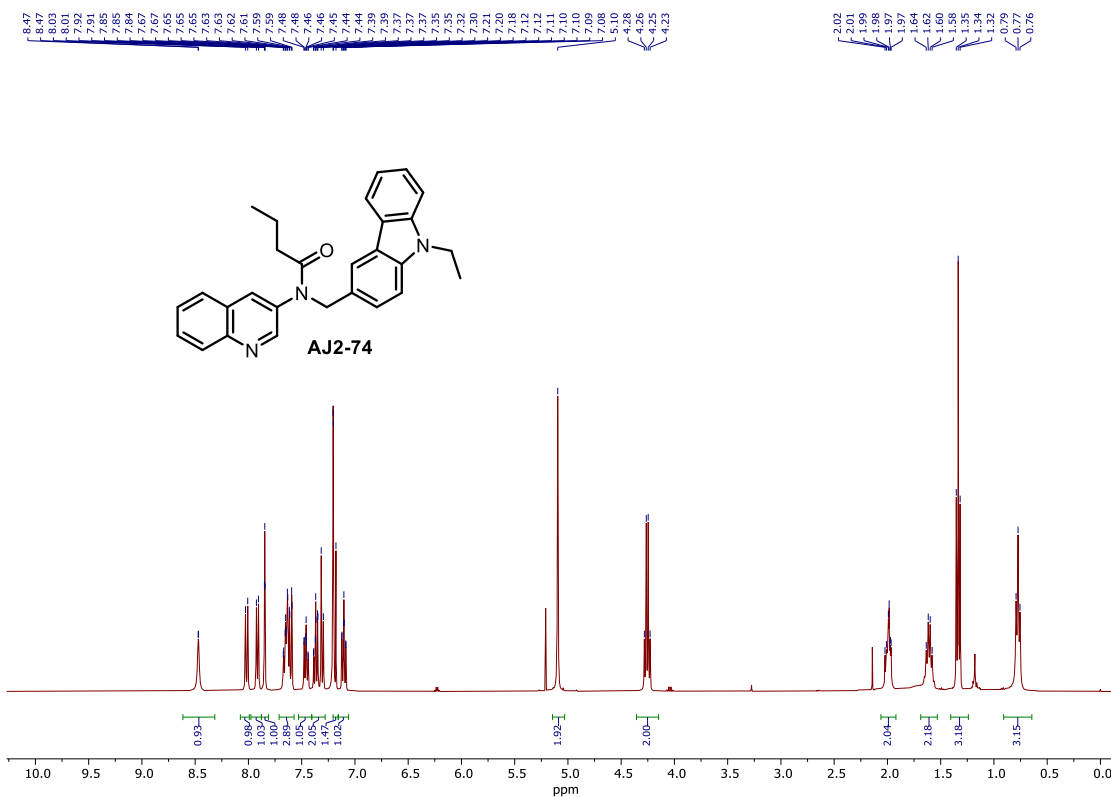

<sup>13</sup>C NMR (CDCl<sub>3</sub>) AJ2-74

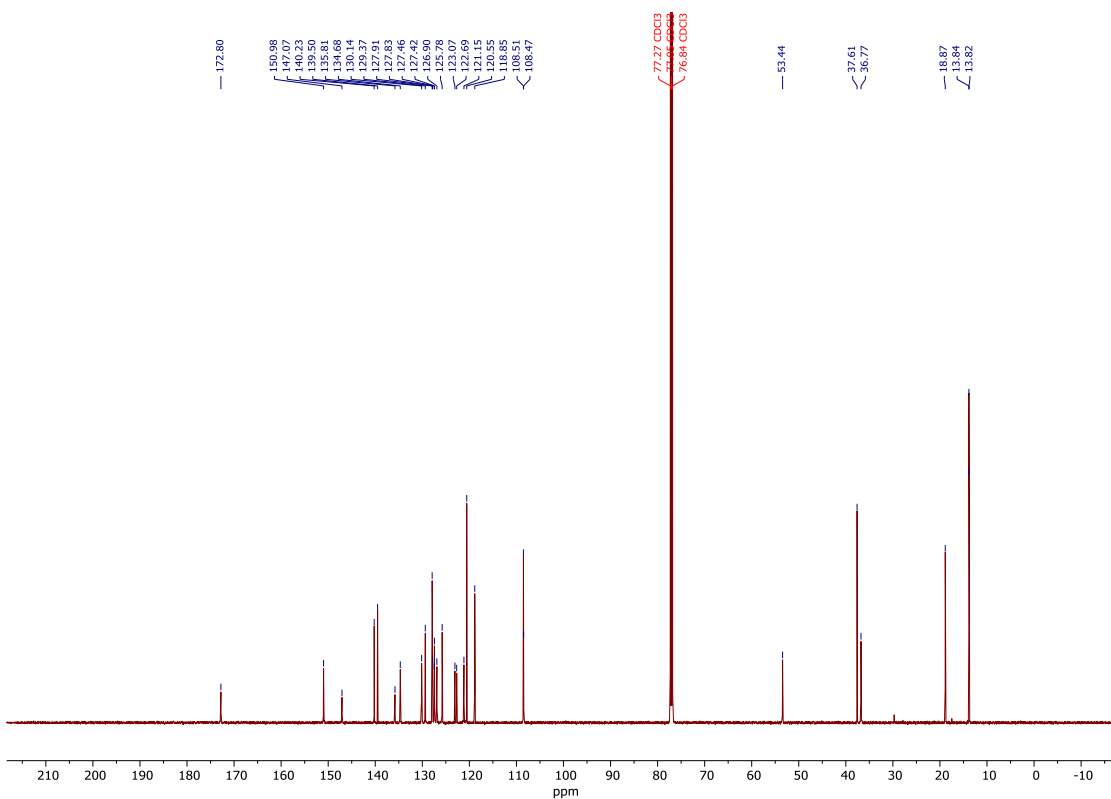

Supplement: NIHMS1994899-supplement-Supplementary_Information.pdf [file NIHMS1994899-supplement-Supplementary_Information.pdf]
